# Supplementary material for: Dehydrogenation of ethanol to acetaldehyde with nitrous oxide over the metal–organic framework NU-1000: a density functional theory study
Source: Royal Society of Chemistry journal article supplement (doi:10.1039/d0cp01451f), 2020-01-01
Supplement: d0cp01451f1.pdf [file d0cp01451f1.pdf]

## Electronic Supplementary Information

### Dehydrogenation of Ethanol to Acetaldehyde with Nitrous Oxide over the Metal-Organic Framework NU-1000: A Density Functional Theory Study

Veerachart Paluka<sup>a</sup>, Thana Maihom<sup>b,c\*</sup>, Michael Probst<sup>d</sup> and Jumras Limtrakul<sup>c</sup>

<sup>a</sup>*Department of Chemistry, Faculty of Science, Kasetsart University, Bangkok 10900, Thailand.*

<sup>b</sup>*Department of Chemistry, Faculty of Liberal Arts and Science, Kasetsart University,  
Kamphaeng Saen Campus, Nakhon Pathom 73140, Thailand*

<sup>c</sup>*Department of Materials Science and Engineering, Vidyasirimedhi Institute of Science and  
Technology, Rayong 21210, Thailand*

<sup>d</sup>*Institute of Ion Physics and Applied Physics, University of Innsbruck, 6020 Innsbruck, Austria.*

#### Contents

|                                                                                                 |    |
|-------------------------------------------------------------------------------------------------|----|
| Section 1: Spin states.....                                                                     | S2 |
| Section 2: N <sub>2</sub> O Decomposition M-Zr-NU1000.....                                      | S3 |
| Section 3: Effect of supported NU-1000 framework.....                                           | S4 |
| Section 4: Ethanol dehydration on Fe-Hf-NU1000 and Fe-Ti-NU1000.....                            | S4 |
| Section 5: Turnover frequencies (TOF).....                                                      | S5 |
| Section 6: Geometry relaxation.....                                                             | S5 |
| Section 7: Coordinates of all optimized structures with total electronic and free energies..... | S6 |

## Section 1: Spin states

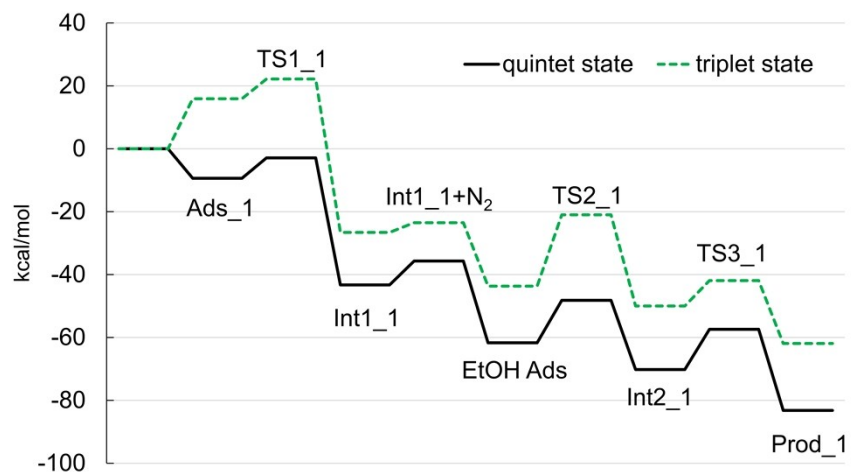

**Fig. S1** Relative energy without thermal corrections for the ethanol dehydration to acetaldehyde with  $N_2O$  over Fe-Zr-NU-1000.

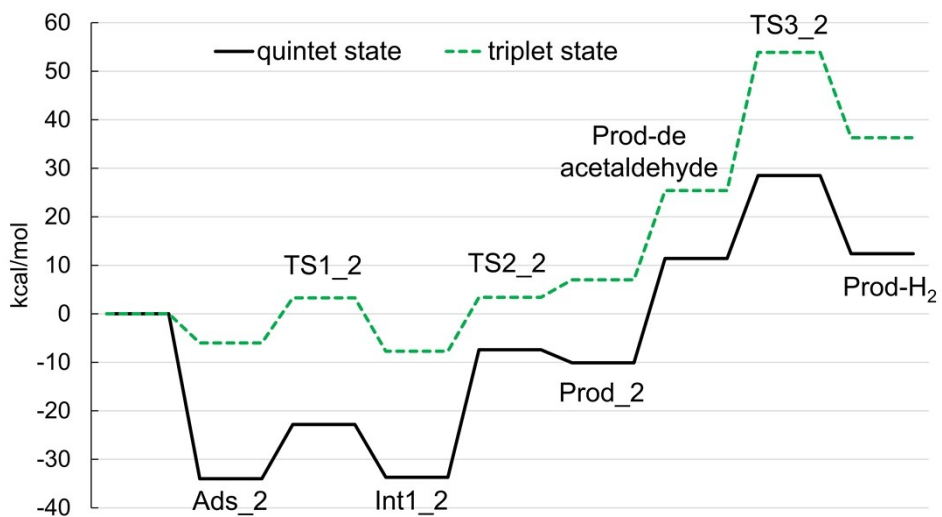

**Fig. S2** Relative energy without thermal corrections for the ethanol dehydration to acetaldehyde without  $N_2O$  over Fe-Zr-NU-1000.

## Section 2: N<sub>2</sub>O Decomposition M-Zr-NU1000

**Table S1** Relative electronic energy without thermal corrections for N<sub>2</sub>O decomposition on M-Zr-NU1000 (M = Co, Ni, Cu and Mn).

| Reaction coordinates         | Relative electronic energy (kcal/mol) |         |               |         |               |         |               |         |
|------------------------------|---------------------------------------|---------|---------------|---------|---------------|---------|---------------|---------|
|                              | Co-Zr-NU-1000                         |         | Ni-Zr-NU-1000 |         | Cu-Zr-NU-1000 |         | Mn-Zr-NU-1000 |         |
|                              | Quartet                               | Doublet | Triplet       | Singlet | Quartet       | Doublet | Sextet        | Quartet |
| M-Zr-NU-1000                 | 0.0                                   | 18.4    | 0.0           | 79.3    | 87.6          | 0.0     | 0.0           | 30.9    |
| N <sub>2</sub> O Ads (Ads_1) | -16.1                                 | 10.5    | -12.8         | 32.5    | 78.0          | -9.3    | -16.7         | 23.8    |
| TS (TS1_1)                   | 10.9                                  | 32.1    | 24.8          | 69.2    | 45.6          | 35.5    | 12.6          | 7.2     |
| Int (Int1_1)                 | -25.5                                 | -10.0   | -5.9          | 20.7    | 22.1          | 7.4     | -16.8         | -46.9   |

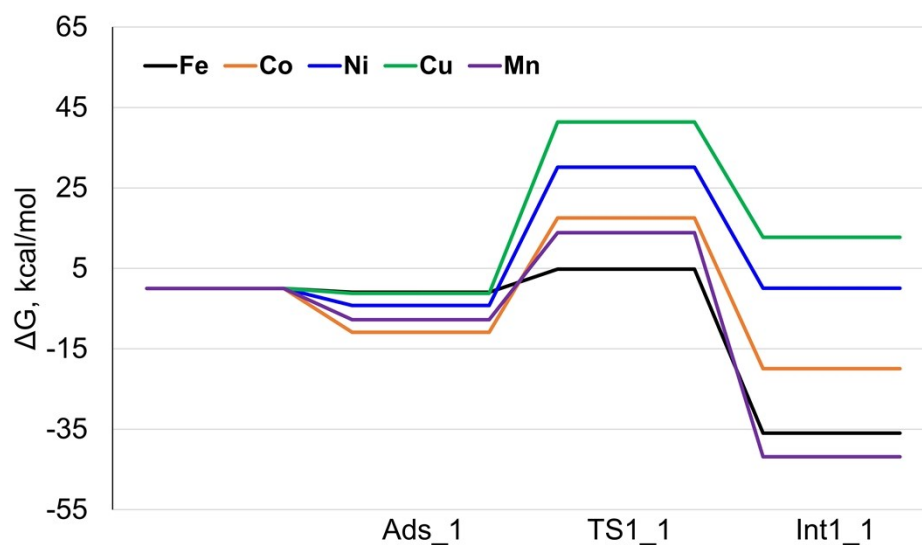

**Fig. S3** Gibbs free energy profile for N<sub>2</sub>O decomposition on M-Zr-NU1000 (M=Fe, Mn, Co, Ni and Cu). The superscript numbers in the energy profiles refer to the spin states of each complex.

### Section 3: Effect of supported NU-1000 framework

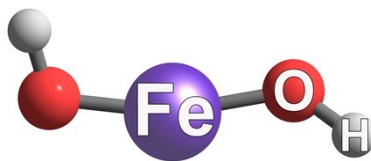

**Fig. S4** Cluster model of Fe-NU-1000 without the whole NU-1000 framework.

### Section 4: Ethanol dehydration on Fe-Hf-NU1000 and Fe-Ti-NU1000

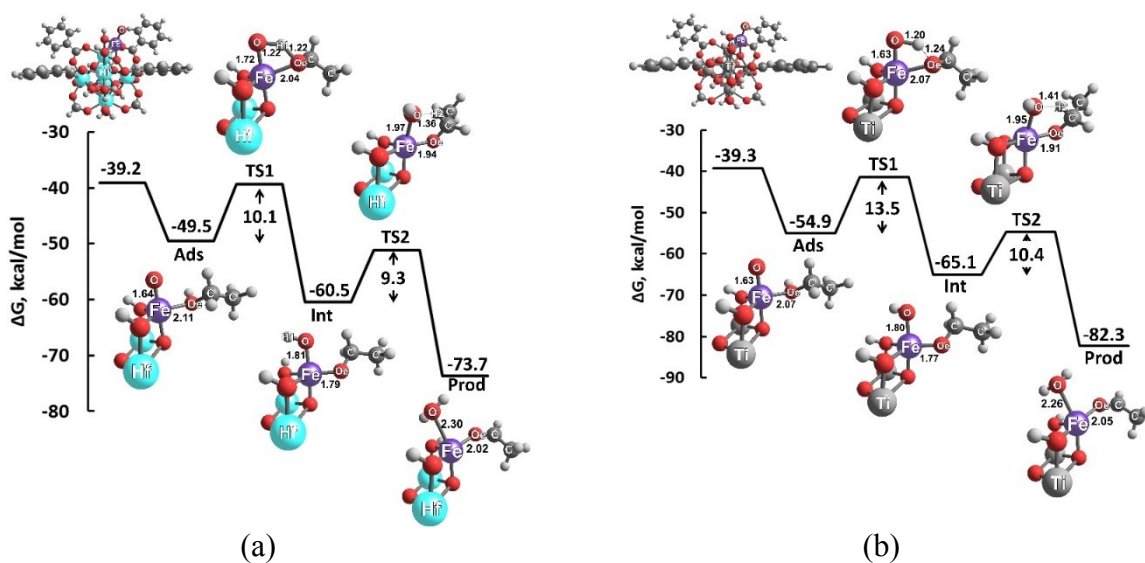

**Fig. S5** Gibbs free energy profile for ethanol dehydration on Fe-Hf-NU1000 (a) and Fe-Ti-NU1000 (b).

### Section 5: Turnover frequencies (TOF) and energy span

The turnover frequencies (TOF) for the catalytic pathways using the energy span model of Kozuch and Shaik via equation (1):

$$TOF = \frac{k_B T}{h} \frac{e^{-\Delta G_r/RT} - 1}{\sum_{i=1, j=0}^N e^{(T_i - I_j - \delta G_{ij}/RT)}} \quad (1)$$

$k_B$  is Boltzmann's constant,  $h$  is Planck's constant,  $T$  is the absolute temperature,  $R$  is the universal gas constant,  $N$  is the number of steps in the catalytic cycle,  $\Delta G_r$  is the reaction Gibbs free energy,  $T_i$  is the energies of transition states,  $I_j$  is the energies of intermediates, and  $\delta G_{ij}$  is defined as

$$\delta G_{ij} = \begin{cases} \Delta G_r, & i > j \\ 0, & i \leq j \end{cases}$$

To calculate the equation 1, for the adsorption and desorption steps that there are no connecting transition state, we set the free energy of the transition states as the free energy of the adsorption (Ads) and the product complex (Prod), respectively which is the same strategies used in reference 26.

### Section 6: Geometry relaxation

The consequences of geometry relaxation was tested by calculating the reaction pathway with fixing only the para-C atoms of benzoate linkers of MOF for non-functionalized and for all functionalized systems, to compare with fixing entire linkers. In the non-functionalized system, both fixing variants give virtually the same relative free energies. For the functionalized system, the relative energies were lower when fixing only para-C atoms (see Table S2), due to hydrogen bond interactions between the reacting molecule and the functionalized groups. The activation energies differ within 1-2 kcal/mol between both sets of restraints. However, in both cases functionalization of the organic linker does not improve the catalytic activity of the MOF.

**Table S2** Relative free energy for the ethanol dehydration with N<sub>2</sub>O over non-functionalized and functionalized Fe-Zr-NU-1000 with fixing only para-C atoms.

| Reaction Coordinates | Relative free energies (kcal/mol) |                  |           |                  |           |
|----------------------|-----------------------------------|------------------|-----------|------------------|-----------|
|                      | -H                                | -NH <sub>2</sub> | -OH       | -NO <sub>2</sub> | -Br       |
| Ads_4                | -11.0                             | -16.0            | -15.5     | -9.2             | -12.3     |
| TS1_4                | -1.4                              | -3.1             | -3.3      | 3.8              | -1.8      |
|                      | (Ea=9.6)                          | (Ea=12.9)        | (Ea=12.2) | (Ea=13.0)        | (Ea=10.5) |
| Int1_4               | -22.3                             | -26.2            | -27.0     | -21.7            | -26.0     |
| TS2_4                | -12.2                             | -15.2            | -16.4     | -11.8            | -15.3     |

|        |           |           |           |          |           |
|--------|-----------|-----------|-----------|----------|-----------|
|        | (Ea=10.1) | (Ea=11.0) | (Ea=10.6) | (Ea=9.9) | (Ea=10.7) |
| Prod 4 | -36.4     | -37.4     | -42.0     | -54.7    | -40.3     |

---

**Section 7: Coordinates of all optimized structures with total electronic and free energies**

**Reacting molecules**

N<sub>2</sub>O

Free Energy: -184.66497

Electronic Energy: -184.657689

|   |              |              |             |
|---|--------------|--------------|-------------|
| N | -0.026220000 | -0.629467000 | 0.000002000 |
| O | 0.752289000  | -2.828363000 | 0.000046000 |
| N | 0.355243000  | -1.707364000 | 0.000024000 |

N<sub>2</sub>

Free Energy: -109.527657

Electronic Energy: -109.5147253

|   |              |              |             |
|---|--------------|--------------|-------------|
| N | -0.040704000 | -0.588870000 | 0.000001000 |
| N | 0.329880000  | -1.635434000 | 0.000022000 |

H<sub>2</sub>

Free Energy: -1.171624

Electronic Energy: -1.1700775

|   |             |              |             |
|---|-------------|--------------|-------------|
| H | 0.655919000 | -2.556201000 | 0.000041000 |
| H | 0.407644000 | -1.855047000 | 0.000027000 |

Ethanol

Free Energy: -154.963603

Electronic Energy: -155.0187494

|   |              |              |              |
|---|--------------|--------------|--------------|
| C | -1.999636000 | 0.933761000  | 0.000000000  |
| H | -1.637939000 | 1.466560000  | 0.883583000  |
| H | -1.637936000 | 1.466559000  | -0.883582000 |
| H | -3.092447000 | 0.966877000  | -0.000002000 |
| C | -1.500108000 | -0.488585000 | 0.000001000  |
| H | -1.886045000 | -1.023863000 | -0.884627000 |
| H | -1.886046000 | -1.023862000 | 0.884630000  |
| O | -0.084628000 | -0.448375000 | 0.000002000  |
| H | 0.230554000  | -1.356191000 | 0.000012000  |

Acetaldehyde

Free Energy: -153.782979

Electronic Energy: -153.8135709

|   |              |              |             |
|---|--------------|--------------|-------------|
| C | -1.404571000 | 1.769809000  | 1.965373000 |
| O | -0.381332000 | 1.939194000  | 1.344082000 |
| H | -1.818564000 | 2.581161000  | 2.614650000 |
| C | -2.216932000 | 0.512800000  | 1.953991000 |
| H | -3.240967000 | 0.730454000  | 1.631983000 |
| H | -1.771665000 | -0.234425000 | 1.296194000 |
| H | -2.297907000 | 0.112220000  | 2.970394000 |

**Reaction with N<sub>2</sub>O**

Fe-NU-1000

Free Energy: -4057.65154

Electronic Energy: -4057.8100964

|   |              |              |              |
|---|--------------|--------------|--------------|
| C | 5.726500000  | -2.889200000 | -2.160200000 |
| C | -5.638900000 | -2.885100000 | -2.451400000 |
| C | 4.388900000  | -3.187700000 | -2.460000000 |
| C | -4.293000000 | -3.161900000 | -2.734600000 |
| C | 4.106400000  | -4.252600000 | -3.328500000 |
| C | -3.986000000 | -4.236300000 | -3.582700000 |
| C | 5.138200000  | -5.020700000 | -3.859400000 |
| C | -4.998200000 | -5.035200000 | -4.107600000 |
| C | 6.482800000  | -4.751200000 | -3.537700000 |
| C | -6.351100000 | -4.782200000 | -3.807100000 |
| C | 6.755800000  | -3.657500000 | -2.694900000 |
| C | -6.649700000 | -3.679700000 | -2.983400000 |
| C | 5.673400000  | 2.762000000  | -2.369400000 |
| C | -5.668800000 | 2.628900000  | -2.684600000 |
| C | 4.341400000  | 3.021300000  | -2.724800000 |
| C | -4.324800000 | 2.872000000  | -3.008000000 |
| C | 4.069900000  | 4.017800000  | -3.673300000 |
| C | -4.019400000 | 3.907100000  | -3.904900000 |
| C | 5.105900000  | 4.760700000  | -4.231200000 |
| C | -5.033000000 | 4.692700000  | -4.448900000 |
| C | 6.444700000  | 4.526400000  | -3.861700000 |
| C | -6.384200000 | 4.462600000  | -4.123400000 |
| C | 6.708200000  | 3.500400000  | -2.934600000 |
| C | -6.680500000 | 3.408600000  | -3.237600000 |
| C | -3.223400000 | -2.332300000 | -2.105800000 |
| C | -3.315200000 | -2.089500000 | 2.441200000  |
| C | -3.322900000 | 2.330100000  | 2.211500000  |
| C | 3.188500000  | 2.437000000  | 2.193700000  |
| C | 3.242000000  | 2.242000000  | -2.086000000 |
| C | 3.280300000  | -2.402400000 | -1.851700000 |
| C | -3.245500000 | 2.084800000  | -2.346700000 |
| C | 3.174600000  | -2.211100000 | 2.426600000  |
| H | 5.937000000  | -2.056700000 | -1.495800000 |
| H | -5.871700000 | -2.048200000 | -1.800500000 |
| H | 3.070800000  | -4.466900000 | -3.573300000 |
| H | -2.943100000 | -4.450000000 | -3.798200000 |
| H | 4.900900000  | -5.847200000 | -4.524400000 |
| H | -4.737200000 | -5.873100000 | -4.749000000 |
| H | 7.786000000  | -3.416500000 | -2.445100000 |
| H | -7.686200000 | -3.452500000 | -2.747200000 |
| H | 5.874800000  | 1.981600000  | -1.642500000 |
| H | -5.899000000 | 1.830200000  | -1.986300000 |

|   |              |              |              |
|---|--------------|--------------|--------------|
| H | 3.038900000  | 4.198500000  | -3.962800000 |
| H | -2.978300000 | 4.100400000  | -4.145000000 |
| H | 4.876900000  | 5.534100000  | -4.959800000 |
| H | -4.774300000 | 5.498300000  | -5.131200000 |
| H | 7.734600000  | 3.290500000  | -2.644500000 |
| H | -7.714900000 | 3.205600000  | -2.972200000 |
| H | -7.139900000 | -5.409200000 | -4.210200000 |
| H | 7.286100000  | -5.356800000 | -3.944800000 |
| H | -7.172900000 | 5.077500000  | -4.544800000 |
| H | 7.252000000  | 5.109100000  | -4.293600000 |
| H | -4.101094000 | -2.666618000 | 2.881887000  |
| H | 3.964843000  | 3.004750000  | 2.662583000  |
| H | -4.111859000 | 2.914440000  | 2.636930000  |
| H | 3.948377000  | -2.768397000 | 2.911976000  |
| O | -3.663700000 | 1.472100000  | 1.337400000  |
| O | -3.610000000 | 1.255400000  | -1.456700000 |
| O | -3.654000000 | -1.258600000 | 1.542900000  |
| O | -2.127300000 | -2.310200000 | 2.835700000  |
| O | 1.970300000  | -2.521800000 | 2.683600000  |
| O | 2.090000000  | -2.742700000 | -2.140600000 |
| O | 3.548200000  | -1.286100000 | 1.640800000  |
| O | 3.614200000  | -1.448400000 | -1.083700000 |
| O | 3.557200000  | 1.485700000  | 1.438500000  |
| O | 3.591800000  | 1.320300000  | -1.285300000 |
| O | 2.046400000  | 2.547800000  | -2.386400000 |
| O | 1.986500000  | 2.771300000  | 2.435700000  |
| O | -2.020200000 | -2.554500000 | -2.444700000 |
| O | -3.604000000 | -1.474700000 | -1.248400000 |
| O | -2.134300000 | 2.562400000  | 2.592300000  |
| O | -2.045100000 | 2.316700000  | -2.694300000 |
| H | -1.970851000 | -2.847065000 | 0.218981000  |
| H | -1.034981000 | 1.810529000  | 4.303636000  |
| H | -0.136305000 | 0.507216000  | 4.146959000  |
| H | -0.753485000 | 1.570597000  | -4.383665000 |
| H | 0.011493000  | 4.083183000  | -0.368329000 |
| H | 0.645251000  | 4.476385000  | 1.651872000  |
| H | 0.938614000  | 4.209255000  | -1.650838000 |
| H | 1.874585000  | 0.160560000  | 2.977068000  |
| H | -1.962513000 | 2.892160000  | -0.091001000 |
| H | -0.815736000 | -1.491085000 | 4.551663000  |
| H | 0.956193000  | -2.704973000 | -4.034519000 |
| H | 0.837710000  | -4.189648000 | 1.944911000  |
| H | 0.775793000  | -4.425078000 | -1.319883000 |
| H | -0.003779000 | -4.016888000 | 0.605089000  |
| O | -1.117948000 | 0.121962000  | 1.536498000  |
| O | -0.018492000 | -3.887267000 | 1.616146000  |
| O | 1.038385000  | 1.518960000  | 0.024993000  |
| O | 1.313644000  | 0.155165000  | 2.194230000  |
| O | -0.078491000 | -1.090012000 | 4.079569000  |



|    |              |              |              |
|----|--------------|--------------|--------------|
| O  | -0.159966000 | 1.517939000  | 4.018534000  |
| O  | 0.282805000  | -2.033303000 | -3.864666000 |
| O  | 1.034666000  | -1.463593000 | 0.207276000  |
| O  | -1.423001000 | -2.054785000 | 0.218504000  |
| O  | -0.004989000 | -3.968432000 | -0.989823000 |
| O  | -0.087096000 | 4.000178000  | 1.246152000  |
| O  | 0.051384000  | 3.945354000  | -1.372669000 |
| O  | -1.423848000 | 2.094390000  | -0.051982000 |
| O  | 0.132569000  | 1.480827000  | -4.011988000 |
| O  | 1.339879000  | -0.099493000 | -2.043309000 |
| O  | -1.110906000 | -0.082659000 | -1.441678000 |
| Zr | 2.462104000  | 0.004423000  | 0.113390000  |
| Zr | -0.086438000 | -1.617152000 | 2.034852000  |
| Zr | -0.043931000 | 1.956849000  | 1.758626000  |
| Zr | -0.017781000 | 1.658044000  | -1.775576000 |
| Zr | -2.554956000 | -0.003411000 | 0.043498000  |
| Zr | -0.000017000 | -1.930276000 | -1.569901000 |
| Fe | 0.987952000  | -0.248843000 | -3.899145000 |

Fe-NU-1000 (Ads\_1)

Free Energy: -4242.318019

Electronic Energy: -4242.4827982

|   |              |              |              |
|---|--------------|--------------|--------------|
| C | 5.726500000  | -2.889200000 | -2.160200000 |
| C | -5.638900000 | -2.885100000 | -2.451400000 |
| C | 4.388900000  | -3.187700000 | -2.460000000 |
| C | -4.293000000 | -3.161898000 | -2.734602000 |
| C | 4.106400000  | -4.252600000 | -3.328500000 |
| C | -3.986000000 | -4.236300000 | -3.582700000 |
| C | 5.138200000  | -5.020700000 | -3.859400000 |
| C | -4.998200000 | -5.035200000 | -4.107600000 |
| C | 6.482800000  | -4.751200000 | -3.537700000 |
| C | -6.351100000 | -4.782200000 | -3.807100000 |
| C | 6.755800000  | -3.657500000 | -2.694900000 |
| C | -6.649700000 | -3.679700000 | -2.983400000 |
| C | 5.673400000  | 2.762000000  | -2.369400000 |
| C | -5.668800000 | 2.628900000  | -2.684600000 |
| C | 4.341400000  | 3.021308000  | -2.724790000 |
| C | -4.324800000 | 2.872000000  | -3.007999000 |
| C | 4.069900000  | 4.017800000  | -3.673300000 |
| C | -4.019400000 | 3.907100000  | -3.904900000 |
| C | 5.105900000  | 4.760700000  | -4.231200000 |
| C | -5.033000000 | 4.692700000  | -4.448900000 |
| C | 6.444700000  | 4.526400000  | -3.861700000 |
| C | -6.384200000 | 4.462600000  | -4.123400000 |
| C | 6.708200000  | 3.500400000  | -2.934600000 |
| C | -6.680500000 | 3.408600000  | -3.237600000 |
| C | -3.223384000 | -2.332228000 | -2.105805000 |
| C | -3.315195000 | -2.089489000 | 2.441205000  |

|   |              |              |              |
|---|--------------|--------------|--------------|
| C | -3.322908000 | 2.330099000  | 2.211501000  |
| C | 3.188500000  | 2.436997000  | 2.193702000  |
| C | 3.241992000  | 2.241996000  | -2.085984000 |
| C | 3.280309000  | -2.402405000 | -1.851728000 |
| C | -3.245504000 | 2.084763000  | -2.346726000 |
| C | 3.174602000  | -2.211102000 | 2.426603000  |
| H | 5.937000000  | -2.056700000 | -1.495800000 |
| H | -5.871700000 | -2.048200000 | -1.800500000 |
| H | 3.070800000  | -4.466900000 | -3.573300000 |
| H | -2.943100000 | -4.450000000 | -3.798200000 |
| H | 4.900900000  | -5.847200000 | -4.524400000 |
| H | -4.737200000 | -5.873100000 | -4.749000000 |
| H | 7.786000000  | -3.416500000 | -2.445100000 |
| H | -7.686200000 | -3.452500000 | -2.747200000 |
| H | 5.874800000  | 1.981600000  | -1.642500000 |
| H | -5.899000000 | 1.830200000  | -1.986300000 |
| H | 3.038900000  | 4.198500000  | -3.962800000 |
| H | -2.978300000 | 4.100400000  | -4.145000000 |
| H | 4.876900000  | 5.534100000  | -4.959800000 |
| H | -4.774300000 | 5.498300000  | -5.131200000 |
| H | 7.734600000  | 3.290500000  | -2.644500000 |
| H | -7.714900000 | 3.205600000  | -2.972200000 |
| H | -7.139900000 | -5.409200000 | -4.210200000 |
| H | 7.286100000  | -5.356800000 | -3.944800000 |
| H | -7.172900000 | 5.077500000  | -4.544800000 |
| H | 7.252000000  | 5.109100000  | -4.293600000 |
| H | -4.101094000 | -2.666621000 | 2.881883000  |
| H | 3.964843000  | 3.004754000  | 2.662579000  |
| H | -4.111859000 | 2.914439000  | 2.636931000  |
| H | 3.948377000  | -2.768397000 | 2.911976000  |
| O | -3.663757000 | 1.472077000  | 1.337383000  |
| O | -3.610003000 | 1.255376000  | -1.456716000 |
| O | -3.653955000 | -1.258607000 | 1.542899000  |
| O | -2.127256000 | -2.310203000 | 2.835720000  |
| O | 1.970329000  | -2.521817000 | 2.683609000  |
| O | 2.090008000  | -2.742663000 | -2.140682000 |
| O | 3.548194000  | -1.286105000 | 1.640818000  |
| O | 3.614209000  | -1.448400000 | -1.083704000 |
| O | 3.557200000  | 1.485679000  | 1.438496000  |
| O | 3.591775000  | 1.320300000  | -1.285291000 |
| O | 2.046390000  | 2.547602000  | -2.386358000 |
| O | 1.986456000  | 2.771286000  | 2.435675000  |
| O | -2.020211000 | -2.554157000 | -2.444516000 |
| O | -3.603926000 | -1.474693000 | -1.248422000 |
| O | -2.134339000 | 2.562387000  | 2.592268000  |
| O | -2.045128000 | 2.316598000  | -2.694348000 |
| H | -1.973684000 | -2.837890000 | 0.208662000  |
| H | -1.036670000 | 1.804901000  | 4.309946000  |
| H | -0.136596000 | 0.502659000  | 4.148161000  |

|    |              |              |              |
|----|--------------|--------------|--------------|
| H  | -0.739751000 | 1.463203000  | -4.383655000 |
| H  | 0.006680000  | 4.086969000  | -0.354660000 |
| H  | 0.643930000  | 4.479582000  | 1.660501000  |
| H  | 0.929672000  | 4.226472000  | -1.638786000 |
| H  | 1.874954000  | 0.159382000  | 2.976548000  |
| H  | -1.971468000 | 2.895733000  | -0.087070000 |
| H  | -0.816116000 | -1.491223000 | 4.550649000  |
| H  | 0.806857000  | -2.635779000 | -4.122504000 |
| H  | 0.840238000  | -4.187823000 | 1.920678000  |
| H  | 0.785847000  | -4.399158000 | -1.331698000 |
| H  | -0.005701000 | -4.004167000 | 0.585051000  |
| O  | -1.118421000 | 0.124735000  | 1.537133000  |
| O  | -0.018880000 | -3.887007000 | 1.598228000  |
| O  | 1.035275000  | 1.537088000  | 0.034799000  |
| O  | 1.311336000  | 0.156479000  | 2.195645000  |
| O  | -0.078144000 | -1.090703000 | 4.079285000  |
| O  | -0.161228000 | 1.514826000  | 4.023886000  |
| O  | 0.274694000  | -1.883584000 | -3.839502000 |
| O  | 1.033226000  | -1.470453000 | 0.215096000  |
| O  | -1.424602000 | -2.046586000 | 0.214085000  |
| O  | -0.004944000 | -3.952466000 | -1.011910000 |
| O  | -0.092051000 | 4.007139000  | 1.256927000  |
| O  | 0.046166000  | 3.952422000  | -1.360457000 |
| O  | -1.429383000 | 2.100368000  | -0.048014000 |
| O  | 0.141766000  | 1.472868000  | -3.992147000 |
| O  | 1.356930000  | -0.089050000 | -1.978699000 |
| O  | -1.110799000 | -0.073166000 | -1.442158000 |
| Zr | 2.444893000  | 0.005405000  | 0.118304000  |
| Zr | -0.088472000 | -1.618906000 | 2.031736000  |
| Zr | -0.047074000 | 1.960544000  | 1.764802000  |
| Zr | -0.026274000 | 1.665516000  | -1.768311000 |
| Zr | -2.555020000 | -0.003646000 | 0.044322000  |
| Zr | 0.003620000  | -1.910596000 | -1.590129000 |
| Fe | 1.210766000  | -0.146403000 | -3.863893000 |
| N  | 4.408525000  | -0.583234000 | -4.343272000 |
| O  | 3.330743000  | -0.988650000 | -4.673709000 |
| N  | 5.430476000  | -0.198156000 | -4.028159000 |

Fe-NU-1000 (TS1\_1)

Free Energy: -4242.308821

Electronic Energy: -4242.4723745

|   |              |              |              |
|---|--------------|--------------|--------------|
| C | 5.726500000  | -2.889200000 | -2.160200000 |
| C | -5.638900000 | -2.885100000 | -2.451400000 |
| C | 4.388900000  | -3.187700000 | -2.460000000 |
| C | -4.293000000 | -3.161900000 | -2.734600000 |
| C | 4.106400000  | -4.252600000 | -3.328500000 |
| C | -3.986000000 | -4.236300000 | -3.582700000 |
| C | 5.138200000  | -5.020700000 | -3.859400000 |
| C | -4.998200000 | -5.035200000 | -4.107600000 |

|   |              |              |              |
|---|--------------|--------------|--------------|
| C | 6.482800000  | -4.751200000 | -3.537700000 |
| C | -6.351100000 | -4.782200000 | -3.807100000 |
| C | 6.755800000  | -3.657500000 | -2.694900000 |
| C | -6.649700000 | -3.679700000 | -2.983400000 |
| C | 5.673400000  | 2.762000000  | -2.369400000 |
| C | -5.668800000 | 2.628900000  | -2.684600000 |
| C | 4.341400000  | 3.021300000  | -2.724800000 |
| C | -4.324800000 | 2.872000000  | -3.008000000 |
| C | 4.069900000  | 4.017800000  | -3.673300000 |
| C | -4.019400000 | 3.907100000  | -3.904900000 |
| C | 5.105900000  | 4.760700000  | -4.231200000 |
| C | -5.033000000 | 4.692700000  | -4.448900000 |
| C | 6.444700000  | 4.526400000  | -3.861700000 |
| C | -6.384200000 | 4.462600000  | -4.123400000 |
| C | 6.708200000  | 3.500400000  | -2.934600000 |
| C | -6.680500000 | 3.408600000  | -3.237600000 |
| C | -3.223400000 | -2.332300000 | -2.105800000 |
| C | -3.315200000 | -2.089500000 | 2.441200000  |
| C | -3.322900000 | 2.330100000  | 2.211500000  |
| C | 3.188500000  | 2.437000000  | 2.193700000  |
| C | 3.242000000  | 2.242000000  | -2.086000000 |
| C | 3.280300000  | -2.402400000 | -1.851700000 |
| C | -3.245500000 | 2.084800000  | -2.346700000 |
| C | 3.174600000  | -2.211100000 | 2.426600000  |
| H | 5.937000000  | -2.056700000 | -1.495800000 |
| H | -5.871700000 | -2.048200000 | -1.800500000 |
| H | 3.070800000  | -4.466900000 | -3.573300000 |
| H | -2.943100000 | -4.450000000 | -3.798200000 |
| H | 4.900900000  | -5.847200000 | -4.524400000 |
| H | -4.737200000 | -5.873100000 | -4.749000000 |
| H | 7.786000000  | -3.416500000 | -2.445100000 |
| H | -7.686200000 | -3.452500000 | -2.747200000 |
| H | 5.874800000  | 1.981600000  | -1.642500000 |
| H | -5.899000000 | 1.830200000  | -1.986300000 |
| H | 3.038900000  | 4.198500000  | -3.962800000 |
| H | -2.978300000 | 4.100400000  | -4.145000000 |
| H | 4.876900000  | 5.534100000  | -4.959800000 |
| H | -4.774300000 | 5.498300000  | -5.131200000 |
| H | 7.734600000  | 3.290500000  | -2.644500000 |
| H | -7.714900000 | 3.205600000  | -2.972200000 |
| H | -7.139900000 | -5.409200000 | -4.210200000 |
| H | 7.286100000  | -5.356800000 | -3.944800000 |
| H | -7.172900000 | 5.077500000  | -4.544800000 |
| H | 7.252000000  | 5.109100000  | -4.293600000 |
| H | -4.101094000 | -2.666618000 | 2.881887000  |
| H | 3.964843000  | 3.004750000  | 2.662583000  |
| H | -4.111859000 | 2.914440000  | 2.636930000  |
| H | 3.948377000  | -2.768397000 | 2.911976000  |
| O | -3.663700000 | 1.472100000  | 1.337400000  |

|    |             |             |             |
|----|-------------|-------------|-------------|
| O  | -3.61000000 | 1.25540000  | -1.45670000 |
| O  | -3.65400000 | -1.25860000 | 1.54290000  |
| O  | -2.12730000 | -2.31020000 | 2.83570000  |
| O  | 1.97030000  | -2.52180000 | 2.68360000  |
| O  | 2.09000000  | -2.74270000 | -2.14060000 |
| O  | 3.54820000  | -1.28610000 | 1.64080000  |
| O  | 3.61420000  | -1.44840000 | -1.08370000 |
| O  | 3.55720000  | 1.48570000  | 1.43850000  |
| O  | 3.59180000  | 1.32030000  | -1.28530000 |
| O  | 2.04640000  | 2.54780000  | -2.38640000 |
| O  | 1.98650000  | 2.77130000  | 2.43570000  |
| O  | -2.02020000 | -2.55450000 | -2.44470000 |
| O  | -3.60400000 | -1.47470000 | -1.24840000 |
| O  | -2.13430000 | 2.56240000  | 2.59230000  |
| O  | -2.04510000 | 2.31670000  | -2.69430000 |
| H  | -1.97464100 | -2.84192500 | 0.21374300  |
| H  | -1.03343500 | 1.81358500  | 4.31413100  |
| H  | -0.13709700 | 0.50924500  | 4.15380600  |
| H  | -0.64529900 | 1.19161500  | -4.40924800 |
| H  | 0.00269300  | 4.08250000  | -0.35731600 |
| H  | 0.64059500  | 4.48242800  | 1.65698800  |
| H  | 0.92456200  | 4.22508400  | -1.64170700 |
| H  | 1.87054900  | 0.16354800  | 2.98614600  |
| H  | -1.97295000 | 2.89588200  | -0.08523700 |
| H  | -0.81332500 | -1.48949200 | 4.56271000  |
| H  | 0.45135800  | -2.47678300 | -4.27961200 |
| H  | 0.84079300  | -4.18955000 | 1.92575200  |
| H  | 0.78909800  | -4.39833200 | -1.33281900 |
| H  | -0.00946100 | -4.01094700 | 0.59568800  |
| O  | -1.12017400 | 0.12360300  | 1.54133400  |
| O  | -0.01954000 | -3.88947500 | 1.60546400  |
| O  | 1.03253400  | 1.53228400  | 0.03550100  |
| O  | 1.31154100  | 0.15733200  | 2.20186200  |
| O  | -0.07851000 | -1.08814200 | 4.08713700  |
| O  | -0.15999000 | 1.52001100  | 4.02557200  |
| O  | 0.21990700  | -1.67269000 | -3.80506600 |
| O  | 1.03261900  | -1.47338800 | 0.22926600  |
| O  | -1.42546700 | -2.05062500 | 0.21902200  |
| O  | -0.00810900 | -3.95899000 | -1.01771300 |
| O  | -0.09250100 | 4.00591000  | 1.25298000  |
| O  | 0.04270700  | 3.94594800  | -1.36323500 |
| O  | -1.43131000 | 2.10013200  | -0.04689600 |
| O  | 0.19739300  | 1.33608200  | -3.96288700 |
| O  | 1.36566400  | -0.09841000 | -1.93553400 |
| O  | -1.10445100 | -0.07298100 | -1.42845700 |
| Zr | 2.45342600  | 0.00359100  | 0.12872800  |
| Zr | -0.09032700 | -1.61768300 | 2.04194000  |
| Zr | -0.04710900 | 1.96059800  | 1.76440700  |
| Zr | -0.03098100 | 1.66082300  | -1.76942900 |

|    |              |              |              |
|----|--------------|--------------|--------------|
| Zr | -2.557594000 | -0.001409000 | 0.047855000  |
| Zr | 0.005420000  | -1.914608000 | -1.564820000 |
| Fe | 1.467674000  | -0.152840000 | -3.803084000 |
| N  | 4.386411000  | -0.116162000 | -4.195439000 |
| O  | 3.221977000  | -0.534966000 | -4.557369000 |
| N  | 5.520166000  | -0.331917000 | -4.142179000 |

Fe-NU-1000 (Int1\_1)

Free Energy: -4242.373808

Electronic Energy: -4242.5368585

|   |              |              |              |
|---|--------------|--------------|--------------|
| C | 5.726500000  | -2.889200000 | -2.160200000 |
| C | -5.638900000 | -2.885100000 | -2.451400000 |
| C | 4.388900000  | -3.187700000 | -2.460000000 |
| C | -4.292997000 | -3.161921000 | -2.734577000 |
| C | 4.106400000  | -4.252600000 | -3.328500000 |
| C | -3.986000000 | -4.236300000 | -3.582700000 |
| C | 5.138200000  | -5.020700000 | -3.859400000 |
| C | -4.998200000 | -5.035200000 | -4.107600000 |
| C | 6.482800000  | -4.751200000 | -3.537700000 |
| C | -6.351100000 | -4.782200000 | -3.807100000 |
| C | 6.755800000  | -3.657500000 | -2.694900000 |
| C | -6.649700000 | -3.679700000 | -2.983400000 |
| C | 5.673400000  | 2.762000000  | -2.369400000 |
| C | -5.668800000 | 2.628900000  | -2.684600000 |
| C | 4.341399000  | 3.021328000  | -2.724767000 |
| C | -4.324798000 | 2.872022000  | -3.007977000 |
| C | 4.069900000  | 4.017800000  | -3.673300000 |
| C | -4.019400000 | 3.907100000  | -3.904900000 |
| C | 5.105900000  | 4.760700000  | -4.231200000 |
| C | -5.033000000 | 4.692700000  | -4.448900000 |
| C | 6.444700000  | 4.526400000  | -3.861700000 |
| C | -6.384200000 | 4.462600000  | -4.123400000 |
| C | 6.708200000  | 3.500400000  | -2.934600000 |
| C | -6.680500000 | 3.408600000  | -3.237600000 |
| C | -3.223415000 | -2.332400000 | -2.105766000 |
| C | -3.315199000 | -2.089484000 | 2.441202000  |
| C | -3.322897000 | 2.330080000  | 2.211499000  |
| C | 3.188517000  | 2.437024000  | 2.193677000  |
| C | 3.241979000  | 2.242011000  | -2.085859000 |
| C | 3.280341000  | -2.402498000 | -1.851748000 |
| C | -3.245519000 | 2.084910000  | -2.346686000 |
| C | 3.174575000  | -2.211057000 | 2.426634000  |
| H | 5.937000000  | -2.056700000 | -1.495800000 |
| H | -5.871700000 | -2.048200000 | -1.800500000 |
| H | 3.070800000  | -4.466900000 | -3.573300000 |
| H | -2.943100000 | -4.450000000 | -3.798200000 |
| H | 4.900900000  | -5.847200000 | -4.524400000 |
| H | -4.737200000 | -5.873100000 | -4.749000000 |
| H | 7.786000000  | -3.416500000 | -2.445100000 |

|   |              |              |              |
|---|--------------|--------------|--------------|
| H | -7.686200000 | -3.452500000 | -2.747200000 |
| H | 5.874800000  | 1.981600000  | -1.642500000 |
| H | -5.899000000 | 1.830200000  | -1.986300000 |
| H | 3.038900000  | 4.198500000  | -3.962800000 |
| H | -2.978300000 | 4.100400000  | -4.145000000 |
| H | 4.876900000  | 5.534100000  | -4.959800000 |
| H | -4.774300000 | 5.498300000  | -5.131200000 |
| H | 7.734600000  | 3.290500000  | -2.644500000 |
| H | -7.714900000 | 3.205600000  | -2.972200000 |
| H | -7.139900000 | -5.409200000 | -4.210200000 |
| H | 7.286100000  | -5.356800000 | -3.944800000 |
| H | -7.172900000 | 5.077500000  | -4.544800000 |
| H | 7.252000000  | 5.109100000  | -4.293600000 |
| H | -4.101095000 | -2.666615000 | 2.881890000  |
| H | 3.964843000  | 3.004768000  | 2.662561000  |
| H | -4.111860000 | 2.914433000  | 2.636937000  |
| H | 3.948376000  | -2.768371000 | 2.912006000  |
| O | -3.663686000 | 1.472100000  | 1.337408000  |
| O | -3.609978000 | 1.255468000  | -1.456645000 |
| O | -3.654020000 | -1.258567000 | 1.542918000  |
| O | -2.127309000 | -2.310237000 | 2.835660000  |
| O | 1.970301000  | -2.521778000 | 2.683569000  |
| O | 2.089996000  | -2.742359000 | -2.140644000 |
| O | 3.548250000  | -1.286123000 | 1.640746000  |
| O | 3.614208000  | -1.448470000 | -1.083639000 |
| O | 3.557133000  | 1.485630000  | 1.438593000  |
| O | 3.591787000  | 1.320303000  | -1.285310000 |
| O | 2.046421000  | 2.547577000  | -2.386517000 |
| O | 1.986506000  | 2.771319000  | 2.435644000  |
| O | -2.020213000 | -2.554320000 | -2.444846000 |
| O | -3.604000000 | -1.474740000 | -1.248349000 |
| O | -2.134298000 | 2.562423000  | 2.592289000  |
| O | -2.045084000 | 2.316417000  | -2.694327000 |
| H | -1.957477000 | -2.857516000 | 0.227435000  |
| H | -1.032135000 | 1.819469000  | 4.292425000  |
| H | -0.137246000 | 0.514043000  | 4.142000000  |
| H | -0.347318000 | 1.560208000  | -4.718826000 |
| H | 0.003621000  | 4.062331000  | -0.397231000 |
| H | 0.644209000  | 4.474136000  | 1.631720000  |
| H | 0.935227000  | 4.174526000  | -1.672247000 |
| H | 1.868695000  | 0.166263000  | 2.984459000  |
| H | -1.959230000 | 2.885695000  | -0.095057000 |
| H | -0.815486000 | -1.489692000 | 4.551063000  |
| H | -0.367213000 | -2.100355000 | -4.482354000 |
| H | 0.840657000  | -4.193164000 | 1.944696000  |
| H | 0.750588000  | -4.433031000 | -1.353205000 |
| H | 0.005727000  | -4.019033000 | 0.599133000  |
| O | -1.120362000 | 0.119320000  | 1.541762000  |
| O | -0.011178000 | -3.884735000 | 1.610652000  |

|    |              |              |              |
|----|--------------|--------------|--------------|
| O  | 1.035839000  | 1.493966000  | 0.006989000  |
| O  | 1.317083000  | 0.156067000  | 2.194990000  |
| O  | -0.078195000 | -1.090040000 | 4.077758000  |
| O  | -0.157383000 | 1.523051000  | 4.009909000  |
| O  | 0.200434000  | -1.801186000 | -3.766675000 |
| O  | 1.040918000  | -1.446546000 | 0.202689000  |
| O  | -1.419763000 | -2.058243000 | 0.222915000  |
| O  | -0.010276000 | -3.967391000 | -0.990455000 |
| O  | -0.083814000 | 3.991011000  | 1.226568000  |
| O  | 0.043686000  | 3.919631000  | -1.399087000 |
| O  | -1.424507000 | 2.085398000  | -0.053087000 |
| O  | 0.205358000  | 1.347924000  | -3.961793000 |
| O  | 1.308856000  | -0.114802000 | -2.126840000 |
| O  | -1.119018000 | -0.091952000 | -1.421246000 |
| Zr | 2.474873000  | 0.004023000  | 0.121221000  |
| Zr | -0.085145000 | -1.616024000 | 2.035301000  |
| Zr | -0.041972000 | 1.951943000  | 1.745916000  |
| Zr | -0.037140000 | 1.622369000  | -1.796823000 |
| Zr | -2.562158000 | -0.001361000 | 0.050352000  |
| Zr | 0.002650000  | -1.926864000 | -1.559939000 |
| Fe | 1.248550000  | -0.254865000 | -4.045754000 |
| N  | 3.537448000  | -0.175433000 | -4.023928000 |
| O  | 1.354490000  | -0.355690000 | -5.675627000 |
| N  | 4.638729000  | -0.143961000 | -4.152010000 |

Fe-NU-1000 (Int1\_1+N<sub>2</sub>)

Free Energy: -4132.850814

Electronic Energy: -4133.0099428

|   |              |              |              |
|---|--------------|--------------|--------------|
| C | 5.726500000  | -2.889200000 | -2.160200000 |
| C | -5.638900000 | -2.885100000 | -2.451400000 |
| C | 4.388900000  | -3.187703000 | -2.459997000 |
| C | -4.293001000 | -3.161895000 | -2.734605000 |
| C | 4.106400000  | -4.252600000 | -3.328500000 |
| C | -3.986000000 | -4.236300000 | -3.582700000 |
| C | 5.138200000  | -5.020700000 | -3.859400000 |
| C | -4.998200000 | -5.035200000 | -4.107600000 |
| C | 6.482800000  | -4.751200000 | -3.537700000 |
| C | -6.351100000 | -4.782200000 | -3.807100000 |
| C | 6.755800000  | -3.657500000 | -2.694900000 |
| C | -6.649700000 | -3.679700000 | -2.983400000 |
| C | 5.673400000  | 2.762000000  | -2.369400000 |
| C | -5.668800000 | 2.628900000  | -2.684600000 |
| C | 4.341400000  | 3.021292000  | -2.724809000 |
| C | -4.324801000 | 2.871991000  | -3.008009000 |
| C | 4.069900000  | 4.017800000  | -3.673300000 |
| C | -4.019400000 | 3.907100000  | -3.904900000 |
| C | 5.105900000  | 4.760700000  | -4.231200000 |
| C | -5.033000000 | 4.692700000  | -4.448900000 |
| C | 6.444700000  | 4.526400000  | -3.861700000 |



|   |              |              |              |
|---|--------------|--------------|--------------|
| C | -6.384200000 | 4.462600000  | -4.123400000 |
| C | 6.708200000  | 3.500400000  | -2.934600000 |
| C | -6.680500000 | 3.408600000  | -3.237600000 |
| C | -3.223393000 | -2.332292000 | -2.105780000 |
| C | -3.315196000 | -2.089501000 | 2.441198000  |
| C | -3.322899000 | 2.330098000  | 2.211499000  |
| C | 3.188509000  | 2.437018000  | 2.193684000  |
| C | 3.241994000  | 2.241993000  | -2.086000000 |
| C | 3.280295000  | -2.402406000 | -1.851695000 |
| C | -3.245498000 | 2.084781000  | -2.346695000 |
| C | 3.174588000  | -2.211087000 | 2.426611000  |
| H | 5.937000000  | -2.056700000 | -1.495800000 |
| H | -5.871700000 | -2.048200000 | -1.800500000 |
| H | 3.070800000  | -4.466900000 | -3.573300000 |
| H | -2.943100000 | -4.450000000 | -3.798200000 |
| H | 4.900900000  | -5.847200000 | -4.524400000 |
| H | -4.737200000 | -5.873100000 | -4.749000000 |
| H | 7.786000000  | -3.416500000 | -2.445100000 |
| H | -7.686200000 | -3.452500000 | -2.747200000 |
| H | 5.874800000  | 1.981600000  | -1.642500000 |
| H | -5.899000000 | 1.830200000  | -1.986300000 |
| H | 3.038900000  | 4.198500000  | -3.962800000 |
| H | -2.978300000 | 4.100400000  | -4.145000000 |
| H | 4.876900000  | 5.534100000  | -4.959800000 |
| H | -4.774300000 | 5.498300000  | -5.131200000 |
| H | 7.734600000  | 3.290500000  | -2.644500000 |
| H | -7.714900000 | 3.205600000  | -2.972200000 |
| H | -7.139900000 | -5.409200000 | -4.210200000 |
| H | 7.286100000  | -5.356800000 | -3.944800000 |
| H | -7.172900000 | 5.077500000  | -4.544800000 |
| H | 7.252000000  | 5.109100000  | -4.293600000 |
| H | -4.101095000 | -2.666615000 | 2.881890000  |
| H | 3.964843000  | 3.004750000  | 2.662584000  |
| H | -4.111860000 | 2.914436000  | 2.636934000  |
| H | 3.948377000  | -2.768394000 | 2.911979000  |
| O | -3.663703000 | 1.472098000  | 1.337385000  |
| O | -3.610027000 | 1.255383000  | -1.456728000 |
| O | -3.653991000 | -1.258610000 | 1.542882000  |
| O | -2.127297000 | -2.310157000 | 2.835679000  |
| O | 1.970308000  | -2.521772000 | 2.683586000  |
| O | 2.089973000  | -2.742935000 | -2.140712000 |
| O | 3.548173000  | -1.286056000 | 1.640825000  |
| O | 3.614184000  | -1.448414000 | -1.083660000 |
| O | 3.557305000  | 1.485691000  | 1.438468000  |
| O | 3.591853000  | 1.320324000  | -1.285291000 |
| O | 2.046408000  | 2.547971000  | -2.386299000 |
| O | 1.986479000  | 2.771327000  | 2.435704000  |
| O | -2.020234000 | -2.554647000 | -2.444698000 |
| O | -3.604006000 | -1.474709000 | -1.248417000 |

|    |              |              |              |
|----|--------------|--------------|--------------|
| O  | -2.134307000 | 2.562376000  | 2.592285000  |
| O  | -2.045115000 | 2.316842000  | -2.694220000 |
| H  | -1.965348000 | -2.852879000 | 0.222724000  |
| H  | -1.029523000 | 1.821778000  | 4.298306000  |
| H  | -0.136613000 | 0.514993000  | 4.145343000  |
| H  | -0.492261000 | 1.428037000  | -4.613400000 |
| H  | 0.007319000  | 4.077274000  | -0.380496000 |
| H  | 0.642471000  | 4.478481000  | 1.641384000  |
| H  | 0.932768000  | 4.199456000  | -1.664228000 |
| H  | 1.868110000  | 0.165044000  | 2.984585000  |
| H  | -1.965555000 | 2.890971000  | -0.089646000 |
| H  | -0.813253000 | -1.489137000 | 4.554888000  |
| H  | 0.243219000  | -2.394685000 | -4.487653000 |
| H  | 0.840629000  | -4.193232000 | 1.944196000  |
| H  | 0.773843000  | -4.424351000 | -1.336078000 |
| H  | -0.002609000 | -4.023186000 | 0.606973000  |
| O  | -1.119644000 | 0.120280000  | 1.538668000  |
| O  | -0.013987000 | -3.887178000 | 1.614504000  |
| O  | 1.034070000  | 1.501078000  | 0.012544000  |
| O  | 1.316173000  | 0.155888000  | 2.195222000  |
| O  | -0.078337000 | -1.088090000 | 4.079041000  |
| O  | -0.156518000 | 1.523792000  | 4.012145000  |
| O  | 0.177436000  | -1.723409000 | -3.802007000 |
| O  | 1.038241000  | -1.453588000 | 0.205129000  |
| O  | -1.419347000 | -2.059154000 | 0.220334000  |
| O  | -0.008717000 | -3.972598000 | -1.002022000 |
| O  | -0.083883000 | 3.995362000  | 1.233101000  |
| O  | 0.045182000  | 3.937105000  | -1.384661000 |
| O  | -1.426230000 | 2.093346000  | -0.053960000 |
| O  | 0.211644000  | 1.353150000  | -3.961937000 |
| O  | 1.346151000  | -0.105254000 | -2.070829000 |
| O  | -1.096468000 | -0.085047000 | -1.424955000 |
| Zr | 2.478712000  | 0.007013000  | 0.122876000  |
| Zr | -0.086112000 | -1.615016000 | 2.037856000  |
| Zr | -0.042073000 | 1.954562000  | 1.749661000  |
| Zr | -0.035793000 | 1.654494000  | -1.790744000 |
| Zr | -2.557661000 | -0.001928000 | 0.045797000  |
| Zr | 0.006110000  | -1.934685000 | -1.554898000 |
| Fe | 1.317275000  | -0.238756000 | -3.920984000 |
| O  | 2.043298000  | -0.415033000 | -5.363973000 |

Fe-NU-1000 (C<sub>2</sub>H<sub>5</sub>OH Ads)

Free Energy: -4287.830594

Electronic Energy: -4288.0701278

|   |              |              |              |
|---|--------------|--------------|--------------|
| C | 5.726500000  | -2.889200000 | -2.160200000 |
| C | -5.638900000 | -2.885100000 | -2.451400000 |
| C | 4.388900000  | -3.187700000 | -2.460000000 |
| C | -4.293000000 | -3.161900000 | -2.734600000 |
| C | 4.106400000  | -4.252600000 | -3.328500000 |

|   |              |              |              |
|---|--------------|--------------|--------------|
| C | -3.986000000 | -4.236300000 | -3.582700000 |
| C | 5.138200000  | -5.020700000 | -3.859400000 |
| C | -4.998200000 | -5.035200000 | -4.107600000 |
| C | 6.482800000  | -4.751200000 | -3.537700000 |
| C | -6.351100000 | -4.782200000 | -3.807100000 |
| C | 6.755800000  | -3.657500000 | -2.694900000 |
| C | -6.649700000 | -3.679700000 | -2.983400000 |
| C | 5.673400000  | 2.762000000  | -2.369400000 |
| C | -5.668800000 | 2.628900000  | -2.684600000 |
| C | 4.341400000  | 3.021300000  | -2.724800000 |
| C | -4.324800000 | 2.872000000  | -3.008000000 |
| C | 4.069900000  | 4.017800000  | -3.673300000 |
| C | -4.019400000 | 3.907100000  | -3.904900000 |
| C | 5.105900000  | 4.760700000  | -4.231200000 |
| C | -5.033000000 | 4.692700000  | -4.448900000 |
| C | 6.444700000  | 4.526400000  | -3.861700000 |
| C | -6.384200000 | 4.462600000  | -4.123400000 |
| C | 6.708200000  | 3.500400000  | -2.934600000 |
| C | -6.680500000 | 3.408600000  | -3.237600000 |
| C | -3.223400000 | -2.332300000 | -2.105800000 |
| C | -3.315200000 | -2.089500000 | 2.441200000  |
| C | -3.322900000 | 2.330100000  | 2.211500000  |
| C | 3.188500000  | 2.437000000  | 2.193700000  |
| C | 3.242000000  | 2.242000000  | -2.086000000 |
| C | 3.280300000  | -2.402400000 | -1.851700000 |
| C | -3.245500000 | 2.084800000  | -2.346700000 |
| C | 3.174600000  | -2.211100000 | 2.426600000  |
| H | 5.937000000  | -2.056700000 | -1.495800000 |
| H | -5.871700000 | -2.048200000 | -1.800500000 |
| H | 3.070800000  | -4.466900000 | -3.573300000 |
| H | -2.943100000 | -4.450000000 | -3.798200000 |
| H | 4.900900000  | -5.847200000 | -4.524400000 |
| H | -4.737200000 | -5.873100000 | -4.749000000 |
| H | 7.786000000  | -3.416500000 | -2.445100000 |
| H | -7.686200000 | -3.452500000 | -2.747200000 |
| H | 5.874800000  | 1.981600000  | -1.642500000 |
| H | -5.899000000 | 1.830200000  | -1.986300000 |
| H | 3.038900000  | 4.198500000  | -3.962800000 |
| H | -2.978300000 | 4.100400000  | -4.145000000 |
| H | 4.876900000  | 5.534100000  | -4.959800000 |
| H | -4.774300000 | 5.498300000  | -5.131200000 |
| H | 7.734600000  | 3.290500000  | -2.644500000 |
| H | -7.714900000 | 3.205600000  | -2.972200000 |
| H | -7.139900000 | -5.409200000 | -4.210200000 |
| H | 7.286100000  | -5.356800000 | -3.944800000 |
| H | -7.172900000 | 5.077500000  | -4.544800000 |
| H | 7.252000000  | 5.109100000  | -4.293600000 |
| H | -4.101094000 | -2.666618000 | 2.881887000  |
| H | 3.964843000  | 3.004750000  | 2.662583000  |

|    |              |              |              |
|----|--------------|--------------|--------------|
| H  | -4.111859000 | 2.914440000  | 2.636930000  |
| H  | 3.948377000  | -2.768397000 | 2.911976000  |
| O  | -3.663700000 | 1.472100000  | 1.337400000  |
| O  | -3.610000000 | 1.255400000  | -1.456700000 |
| O  | -3.654000000 | -1.258600000 | 1.542900000  |
| O  | -2.127300000 | -2.310200000 | 2.835700000  |
| O  | 1.970300000  | -2.521800000 | 2.683600000  |
| O  | 2.090000000  | -2.742700000 | -2.140600000 |
| O  | 3.548200000  | -1.286100000 | 1.640800000  |
| O  | 3.614200000  | -1.448400000 | -1.083700000 |
| O  | 3.557200000  | 1.485700000  | 1.438500000  |
| O  | 3.591800000  | 1.320300000  | -1.285300000 |
| O  | 2.046400000  | 2.547800000  | -2.386400000 |
| O  | 1.986500000  | 2.771300000  | 2.435700000  |
| O  | -2.020200000 | -2.554500000 | -2.444700000 |
| O  | -3.604000000 | -1.474700000 | -1.248400000 |
| O  | -2.134300000 | 2.562400000  | 2.592300000  |
| O  | -2.045100000 | 2.316700000  | -2.694300000 |
| H  | -1.955611000 | -2.858574000 | 0.228896000  |
| H  | -1.037154000 | 1.815810000  | 4.282139000  |
| H  | -0.137629000 | 0.513364000  | 4.138260000  |
| H  | -0.402591000 | 1.552332000  | -4.694340000 |
| H  | 0.003353000  | 4.057525000  | -0.403710000 |
| H  | 0.646242000  | 4.471303000  | 1.630067000  |
| H  | 0.937546000  | 4.164860000  | -1.674704000 |
| H  | 1.869379000  | 0.166005000  | 2.983227000  |
| H  | -1.957426000 | 2.882655000  | -0.096782000 |
| H  | -0.817903000 | -1.489613000 | 4.546522000  |
| H  | -0.520465000 | -2.100295000 | -4.388557000 |
| H  | 0.842990000  | -4.189718000 | 1.941793000  |
| H  | 0.752635000  | -4.428890000 | -1.351807000 |
| H  | 0.008961000  | -4.015574000 | 0.593668000  |
| O  | -1.120489000 | 0.118639000  | 1.542737000  |
| O  | -0.009941000 | -3.884427000 | 1.607873000  |
| O  | 1.037937000  | 1.491662000  | 0.004458000  |
| O  | 1.317736000  | 0.155555000  | 2.193933000  |
| O  | -0.077527000 | -1.091736000 | 4.076596000  |
| O  | -0.158742000 | 1.522472000  | 4.007561000  |
| O  | 0.181360000  | -1.880857000 | -3.768064000 |
| O  | 1.043184000  | -1.446595000 | 0.202004000  |
| O  | -1.420391000 | -2.057781000 | 0.223365000  |
| O  | -0.008479000 | -3.966233000 | -0.986317000 |
| O  | -0.083760000 | 3.990361000  | 1.226034000  |
| O  | 0.043509000  | 3.916177000  | -1.404565000 |
| O  | -1.423929000 | 2.081748000  | -0.053357000 |
| O  | 0.197577000  | 1.371929000  | -3.965242000 |
| O  | 1.276469000  | -0.115515000 | -2.152814000 |
| O  | -1.133535000 | -0.096342000 | -1.425086000 |
| Zr | 2.472195000  | 0.000863000  | 0.116693000  |

|    |              |              |              |
|----|--------------|--------------|--------------|
| Zr | -0.084369000 | -1.616433000 | 2.032245000  |
| Zr | -0.040392000 | 1.950324000  | 1.741320000  |
| Zr | -0.037675000 | 1.610574000  | -1.803892000 |
| Zr | -2.562249000 | -0.001674000 | 0.051341000  |
| Zr | 0.001890000  | -1.922565000 | -1.566292000 |
| Fe | 1.178850000  | -0.275045000 | -4.099957000 |
| O  | 1.110414000  | -0.336069000 | -5.736759000 |
| C  | 4.033058000  | 0.205550000  | -4.848234000 |
| C  | 5.477764000  | 0.055256000  | -4.460024000 |
| H  | 3.848681000  | 0.107538000  | -5.923087000 |
| H  | 3.633000000  | 1.176838000  | -4.538486000 |
| H  | 5.573147000  | 0.111544000  | -3.371826000 |
| H  | 5.888644000  | -0.902890000 | -4.795128000 |
| H  | 6.072701000  | 0.859896000  | -4.902342000 |
| O  | 3.228761000  | -0.773999000 | -4.136726000 |
| H  | 3.295456000  | -1.621016000 | -4.601247000 |

Fe-NU-1000 (TS2\_1)

Free Energy: -4287.814494

Electronic Energy: -4288.0486191

|   |              |              |              |
|---|--------------|--------------|--------------|
| C | 5.726500000  | -2.889200000 | -2.160200000 |
| C | -5.638900000 | -2.885100000 | -2.451400000 |
| C | 4.388900000  | -3.187700000 | -2.460000000 |
| C | -4.293000000 | -3.161900000 | -2.734600000 |
| C | 4.106400000  | -4.252600000 | -3.328500000 |
| C | -3.986000000 | -4.236300000 | -3.582700000 |
| C | 5.138200000  | -5.020700000 | -3.859400000 |
| C | -4.998200000 | -5.035200000 | -4.107600000 |
| C | 6.482800000  | -4.751200000 | -3.537700000 |
| C | -6.351100000 | -4.782200000 | -3.807100000 |
| C | 6.755800000  | -3.657500000 | -2.694900000 |
| C | -6.649700000 | -3.679700000 | -2.983400000 |
| C | 5.673400000  | 2.762000000  | -2.369400000 |
| C | -5.668800000 | 2.628900000  | -2.684600000 |
| C | 4.341400000  | 3.021300000  | -2.724800000 |
| C | -4.324800000 | 2.872000000  | -3.008000000 |
| C | 4.069900000  | 4.017800000  | -3.673300000 |
| C | -4.019400000 | 3.907100000  | -3.904900000 |
| C | 5.105900000  | 4.760700000  | -4.231200000 |
| C | -5.033000000 | 4.692700000  | -4.448900000 |
| C | 6.444700000  | 4.526400000  | -3.861700000 |
| C | -6.384200000 | 4.462600000  | -4.123400000 |
| C | 6.708200000  | 3.500400000  | -2.934600000 |
| C | -6.680500000 | 3.408600000  | -3.237600000 |
| C | -3.223400000 | -2.332300000 | -2.105800000 |
| C | -3.315200000 | -2.089500000 | 2.441200000  |
| C | -3.322900000 | 2.330100000  | 2.211500000  |
| C | 3.188500000  | 2.437000000  | 2.193700000  |
| C | 3.242000000  | 2.242000000  | -2.086000000 |

|   |              |              |              |
|---|--------------|--------------|--------------|
| C | 3.280300000  | -2.402400000 | -1.851700000 |
| C | -3.245500000 | 2.084800000  | -2.346700000 |
| C | 3.174600000  | -2.211100000 | 2.426600000  |
| H | 5.937000000  | -2.056700000 | -1.495800000 |
| H | -5.871700000 | -2.048200000 | -1.800500000 |
| H | 3.070800000  | -4.466900000 | -3.573300000 |
| H | -2.943100000 | -4.450000000 | -3.798200000 |
| H | 4.900900000  | -5.847200000 | -4.524400000 |
| H | -4.737200000 | -5.873100000 | -4.749000000 |
| H | 7.786000000  | -3.416500000 | -2.445100000 |
| H | -7.686200000 | -3.452500000 | -2.747200000 |
| H | 5.874800000  | 1.981600000  | -1.642500000 |
| H | -5.899000000 | 1.830200000  | -1.986300000 |
| H | 3.038900000  | 4.198500000  | -3.962800000 |
| H | -2.978300000 | 4.100400000  | -4.145000000 |
| H | 4.876900000  | 5.534100000  | -4.959800000 |
| H | -4.774300000 | 5.498300000  | -5.131200000 |
| H | 7.734600000  | 3.290500000  | -2.644500000 |
| H | -7.714900000 | 3.205600000  | -2.972200000 |
| H | -7.139900000 | -5.409200000 | -4.210200000 |
| H | 7.286100000  | -5.356800000 | -3.944800000 |
| H | -7.172900000 | 5.077500000  | -4.544800000 |
| H | 7.252000000  | 5.109100000  | -4.293600000 |
| H | -4.101094000 | -2.666618000 | 2.881887000  |
| H | 3.964843000  | 3.004750000  | 2.662583000  |
| H | -4.111859000 | 2.914440000  | 2.636930000  |
| H | 3.948377000  | -2.768397000 | 2.911976000  |
| O | -3.663700000 | 1.472100000  | 1.337400000  |
| O | -3.610000000 | 1.255400000  | -1.456700000 |
| O | -3.654000000 | -1.258600000 | 1.542900000  |
| O | -2.127300000 | -2.310200000 | 2.835700000  |
| O | 1.970300000  | -2.521800000 | 2.683600000  |
| O | 2.090000000  | -2.742700000 | -2.140600000 |
| O | 3.548200000  | -1.286100000 | 1.640800000  |
| O | 3.614200000  | -1.448400000 | -1.083700000 |
| O | 3.557200000  | 1.485700000  | 1.438500000  |
| O | 3.591800000  | 1.320300000  | -1.285300000 |
| O | 2.046400000  | 2.547800000  | -2.386400000 |
| O | 1.986500000  | 2.771300000  | 2.435700000  |
| O | -2.020200000 | -2.554500000 | -2.444700000 |
| O | -3.604000000 | -1.474700000 | -1.248400000 |
| O | -2.134300000 | 2.562400000  | 2.592300000  |
| O | -2.045100000 | 2.316700000  | -2.694300000 |
| H | -1.954128000 | -2.853152000 | 0.223615000  |
| H | -1.031651000 | 1.820567000  | 4.280389000  |
| H | -0.139438000 | 0.512736000  | 4.133031000  |
| H | -0.587658000 | 1.566609000  | -4.587779000 |
| H | 0.014884000  | 4.077540000  | -0.389784000 |
| H | 0.646573000  | 4.474007000  | 1.640109000  |

|    |             |             |             |
|----|-------------|-------------|-------------|
| H  | 0.93860000  | 4.19076000  | -1.67513600 |
| H  | 1.86165400  | 0.16366400  | 2.99080300  |
| H  | -1.95762300 | 2.89172700  | -0.08734600 |
| H  | -0.81605500 | -1.49329600 | 4.53563300  |
| H  | -0.48219200 | -2.04185700 | -4.44268200 |
| H  | 0.84024800  | -4.19564100 | 1.93824700  |
| H  | 0.73827400  | -4.43969700 | -1.36595800 |
| H  | 0.00836800  | -4.01840200 | 0.58887900  |
| O  | -1.11923600 | 0.12083200  | 1.53877500  |
| O  | -0.00720500 | -3.88005100 | 1.60022100  |
| O  | 1.04350300  | 1.47790700  | -0.00128300 |
| O  | 1.32133500  | 0.15473500  | 2.19347100  |
| O  | -0.07771400 | -1.09202000 | 4.06522000  |
| O  | -0.15630600 | 1.52171700  | 4.00161400  |
| O  | 0.17467800  | -1.81442600 | -3.77708300 |
| O  | 1.04582000  | -1.42500600 | 0.17733100  |
| O  | -1.41442500 | -2.05515900 | 0.21472400  |
| O  | -0.01495800 | -3.96751800 | -0.99559500 |
| O  | -0.07644500 | 3.98999800  | 1.22718400  |
| O  | 0.04905600  | 3.93722800  | -1.39258800 |
| O  | -1.42084500 | 2.09221800  | -0.05599800 |
| O  | 0.12207800  | 1.44263600  | -3.95013400 |
| O  | 1.31728500  | -0.10528000 | -2.23448500 |
| O  | -1.09347700 | -0.08510300 | -1.42288800 |
| Zr | 2.49609800  | 0.00991600  | 0.12975100  |
| Zr | -0.08146600 | -1.61345100 | 2.02242700  |
| Zr | -0.03735100 | 1.94912300  | 1.73821000  |
| Zr | -0.03385500 | 1.65392800  | -1.80488800 |
| Zr | -2.55399300 | -0.00058700 | 0.04449900  |
| Zr | 0.00669100  | -1.93312600 | -1.57966000 |
| Fe | 1.15183900  | -0.20367400 | -4.08979000 |
| O  | 1.02570800  | -0.29232900 | -5.80503600 |
| C  | 4.02541600  | -0.66282100 | -4.82675000 |
| C  | 5.20902000  | -0.18812600 | -4.02710600 |
| H  | 3.64693400  | -1.62266900 | -4.44041100 |
| H  | 4.30765300  | -0.84441900 | -5.87359800 |
| H  | 5.57483600  | 0.76497400  | -4.41983000 |
| H  | 4.93508400  | -0.04546600 | -2.97665400 |
| H  | 6.02018000  | -0.92079800 | -4.07908800 |
| O  | 2.98759400  | 0.32009600  | -4.81171400 |
| H  | 2.17604700  | 0.09715100  | -5.70304500 |

Fe-NU-1000 (Int2\_1)

Free Energy: -4287.847224

Electronic Energy: -4288.0836917

|   |             |             |             |
|---|-------------|-------------|-------------|
| C | 5.72718100  | -2.88920500 | -2.16011100 |
| C | -5.63890000 | -2.88510000 | -2.45140000 |
| C | 4.38942500  | -3.18809500 | -2.46027400 |
| C | -4.29300000 | -3.16189800 | -2.73460200 |

|   |              |              |              |
|---|--------------|--------------|--------------|
| C | 4.105980000  | -4.252480000 | -3.328510000 |
| C | -3.986000000 | -4.236300000 | -3.582700000 |
| C | 5.138196000  | -5.020741000 | -3.859348000 |
| C | -4.998200000 | -5.035200000 | -4.107600000 |
| C | 6.482800000  | -4.751198000 | -3.537703000 |
| C | -6.351100000 | -4.782200000 | -3.807100000 |
| C | 6.755613000  | -3.657663000 | -2.695026000 |
| C | -6.649700000 | -3.679700000 | -2.983400000 |
| C | 5.673400000  | 2.762000000  | -2.369400000 |
| C | -5.668800000 | 2.628900000  | -2.684600000 |
| C | 4.341400000  | 3.021300000  | -2.724800000 |
| C | -4.324800000 | 2.872000000  | -3.008000000 |
| C | 4.069900000  | 4.017800000  | -3.673300000 |
| C | -4.019400000 | 3.907100000  | -3.904900000 |
| C | 5.105900000  | 4.760700000  | -4.231200000 |
| C | -5.033000000 | 4.692700000  | -4.448900000 |
| C | 6.444700000  | 4.526400000  | -3.861700000 |
| C | -6.384200000 | 4.462600000  | -4.123400000 |
| C | 6.708200000  | 3.500400000  | -2.934600000 |
| C | -6.680500000 | 3.408600000  | -3.237600000 |
| C | -3.223399000 | -2.332322000 | -2.105784000 |
| C | -3.315200000 | -2.089492000 | 2.441207000  |
| C | -3.322901000 | 2.330086000  | 2.211511000  |
| C | 3.188501000  | 2.436997000  | 2.193705000  |
| C | 3.242001000  | 2.242013000  | -2.085986000 |
| C | 3.280436000  | -2.402359000 | -1.851501000 |
| C | -3.245500000 | 2.084810000  | -2.346693000 |
| C | 3.174599000  | -2.211094000 | 2.426607000  |
| H | 5.936268000  | -2.056314000 | -1.495647000 |
| H | -5.871700000 | -2.048200000 | -1.800500000 |
| H | 3.070804000  | -4.466850000 | -3.573363000 |
| H | -2.943100000 | -4.450000000 | -3.798200000 |
| H | 4.900900000  | -5.847200000 | -4.524400000 |
| H | -4.737200000 | -5.873100000 | -4.749000000 |
| H | 7.786000000  | -3.416505000 | -2.445093000 |
| H | -7.686200000 | -3.452500000 | -2.747200000 |
| H | 5.874800000  | 1.981600000  | -1.642500000 |
| H | -5.899000000 | 1.830200000  | -1.986300000 |
| H | 3.038900000  | 4.198500000  | -3.962800000 |
| H | -2.978300000 | 4.100400000  | -4.145000000 |
| H | 4.876900000  | 5.534100000  | -4.959800000 |
| H | -4.774300000 | 5.498300000  | -5.131200000 |
| H | 7.734600000  | 3.290500000  | -2.644500000 |
| H | -7.714900000 | 3.205600000  | -2.972200000 |
| H | -7.139900000 | -5.409200000 | -4.210200000 |
| H | 7.286100000  | -5.356800000 | -3.944800000 |
| H | -7.172900000 | 5.077500000  | -4.544800000 |
| H | 7.252000000  | 5.109100000  | -4.293600000 |
| H | -4.101094000 | -2.666618000 | 2.881887000  |



|   |              |              |              |
|---|--------------|--------------|--------------|
| H | 3.964843000  | 3.004750000  | 2.662584000  |
| H | -4.111859000 | 2.914439000  | 2.636931000  |
| H | 3.948377000  | -2.768397000 | 2.911976000  |
| O | -3.663700000 | 1.472105000  | 1.337396000  |
| O | -3.610000000 | 1.255403000  | -1.456697000 |
| O | -3.654000000 | -1.258608000 | 1.542895000  |
| O | -2.127299000 | -2.310202000 | 2.835699000  |
| O | 1.970300000  | -2.521801000 | 2.683598000  |
| O | 2.090004000  | -2.742667000 | -2.140644000 |
| O | 3.548203000  | -1.286101000 | 1.640789000  |
| O | 3.614198000  | -1.448425000 | -1.083670000 |
| O | 3.557196000  | 1.485699000  | 1.438500000  |
| O | 3.591794000  | 1.320297000  | -1.285314000 |
| O | 2.046403000  | 2.547789000  | -2.386408000 |
| O | 1.986502000  | 2.771309000  | 2.435689000  |
| O | -2.020202000 | -2.554482000 | -2.444706000 |
| O | -3.604000000 | -1.474698000 | -1.248399000 |
| O | -2.134300000 | 2.562414000  | 2.592291000  |
| O | -2.045105000 | 2.316682000  | -2.694308000 |
| H | -1.968561000 | -2.848650000 | 0.224099000  |
| H | -1.032086000 | 1.828837000  | 4.276126000  |
| H | -0.139279000 | 0.522279000  | 4.136657000  |
| H | -0.590358000 | 1.251273000  | -4.474458000 |
| H | 0.007152000  | 4.073527000  | -0.389341000 |
| H | 0.646742000  | 4.476155000  | 1.635513000  |
| H | 0.932409000  | 4.194647000  | -1.672537000 |
| H | 1.864162000  | 0.168869000  | 2.986668000  |
| H | -1.962307000 | 2.892251000  | -0.085290000 |
| H | -0.813356000 | -1.487893000 | 4.545509000  |
| H | 0.256490000  | -2.411132000 | -4.341794000 |
| H | 0.847580000  | -4.188990000 | 1.921564000  |
| H | 0.777032000  | -4.410337000 | -1.347155000 |
| H | -0.005198000 | -4.016392000 | 0.589045000  |
| O | -1.121614000 | 0.120157000  | 1.539628000  |
| O | -0.008817000 | -3.882330000 | 1.597551000  |
| O | 1.037475000  | 1.485125000  | -0.000712000 |
| O | 1.319143000  | 0.156757000  | 2.192711000  |
| O | -0.075243000 | -1.089007000 | 4.072812000  |
| O | -0.155310000 | 1.529817000  | 4.002000000  |
| O | 0.139677000  | -1.652858000 | -3.761152000 |
| O | 1.041751000  | -1.440552000 | 0.195741000  |
| O | -1.422451000 | -2.055283000 | 0.220157000  |
| O | -0.013476000 | -3.968430000 | -1.018971000 |
| O | -0.078675000 | 3.993497000  | 1.225319000  |
| O | 0.043526000  | 3.935303000  | -1.393390000 |
| O | -1.424600000 | 2.093361000  | -0.057379000 |
| O | 0.209639000  | 1.338515000  | -3.945213000 |
| O | 1.347748000  | -0.111937000 | -2.104756000 |
| O | -1.096391000 | -0.077803000 | -1.423259000 |

|    |              |              |              |
|----|--------------|--------------|--------------|
| Zr | 2.491992000  | 0.011136000  | 0.122491000  |
| Zr | -0.084930000 | -1.611419000 | 2.030373000  |
| Zr | -0.038474000 | 1.950623000  | 1.733339000  |
| Zr | -0.029687000 | 1.656379000  | -1.817919000 |
| Zr | -2.556027000 | 0.001588000  | 0.043599000  |
| Zr | -0.000449000 | -1.921896000 | -1.559809000 |
| Fe | 1.493176000  | -0.246003000 | -3.931942000 |
| O  | 1.485396000  | -0.543214000 | -5.722901000 |
| C  | 4.077270000  | -0.144510000 | -5.080411000 |
| C  | 5.511259000  | -0.021161000 | -4.606662000 |
| H  | 3.876406000  | -1.165840000 | -5.434883000 |
| H  | 3.862953000  | 0.530427000  | -5.921284000 |
| H  | 5.763294000  | 1.016533000  | -4.376569000 |
| H  | 5.635301000  | -0.616031000 | -3.697524000 |
| H  | 6.197679000  | -0.392605000 | -5.372938000 |
| O  | 3.235121000  | 0.169415000  | -3.994128000 |
| H  | 0.586987000  | -0.790640000 | -5.980452000 |

Fe-NU-1000 (TS3\_1)

Free Energy: -4287.833074

Electronic Energy: -4288.0632164

|   |              |              |              |
|---|--------------|--------------|--------------|
| C | 5.726500000  | -2.889200000 | -2.160200000 |
| C | -5.638900000 | -2.885100000 | -2.451400000 |
| C | 4.388900000  | -3.187700000 | -2.460000000 |
| C | -4.293000000 | -3.161900000 | -2.734600000 |
| C | 4.106400000  | -4.252600000 | -3.328500000 |
| C | -3.986000000 | -4.236300000 | -3.582700000 |
| C | 5.138200000  | -5.020700000 | -3.859400000 |
| C | -4.998200000 | -5.035200000 | -4.107600000 |
| C | 6.482800000  | -4.751200000 | -3.537700000 |
| C | -6.351100000 | -4.782200000 | -3.807100000 |
| C | 6.755800000  | -3.657500000 | -2.694900000 |
| C | -6.649700000 | -3.679700000 | -2.983400000 |
| C | 5.673400000  | 2.762000000  | -2.369400000 |
| C | -5.668800000 | 2.628900000  | -2.684600000 |
| C | 4.341400000  | 3.021300000  | -2.724800000 |
| C | -4.324800000 | 2.872000000  | -3.008000000 |
| C | 4.069900000  | 4.017800000  | -3.673300000 |
| C | -4.019400000 | 3.907100000  | -3.904900000 |
| C | 5.105900000  | 4.760700000  | -4.231200000 |
| C | -5.033000000 | 4.692700000  | -4.448900000 |
| C | 6.444700000  | 4.526400000  | -3.861700000 |
| C | -6.384200000 | 4.462600000  | -4.123400000 |
| C | 6.708200000  | 3.500400000  | -2.934600000 |
| C | -6.680500000 | 3.408600000  | -3.237600000 |
| C | -3.223400000 | -2.332300000 | -2.105800000 |
| C | -3.315200000 | -2.089500000 | 2.441200000  |
| C | -3.322900000 | 2.330100000  | 2.211500000  |
| C | 3.188500000  | 2.437000000  | 2.193700000  |

|   |              |              |              |
|---|--------------|--------------|--------------|
| C | 3.242000000  | 2.242000000  | -2.086000000 |
| C | 3.280300000  | -2.402400000 | -1.851700000 |
| C | -3.245500000 | 2.084800000  | -2.346700000 |
| C | 3.174600000  | -2.211100000 | 2.426600000  |
| H | 5.937000000  | -2.056700000 | -1.495800000 |
| H | -5.871700000 | -2.048200000 | -1.800500000 |
| H | 3.070800000  | -4.466900000 | -3.573300000 |
| H | -2.943100000 | -4.450000000 | -3.798200000 |
| H | 4.900900000  | -5.847200000 | -4.524400000 |
| H | -4.737200000 | -5.873100000 | -4.749000000 |
| H | 7.786000000  | -3.416500000 | -2.445100000 |
| H | -7.686200000 | -3.452500000 | -2.747200000 |
| H | 5.874800000  | 1.981600000  | -1.642500000 |
| H | -5.899000000 | 1.830200000  | -1.986300000 |
| H | 3.038900000  | 4.198500000  | -3.962800000 |
| H | -2.978300000 | 4.100400000  | -4.145000000 |
| H | 4.876900000  | 5.534100000  | -4.959800000 |
| H | -4.774300000 | 5.498300000  | -5.131200000 |
| H | 7.734600000  | 3.290500000  | -2.644500000 |
| H | -7.714900000 | 3.205600000  | -2.972200000 |
| H | -7.139900000 | -5.409200000 | -4.210200000 |
| H | 7.286100000  | -5.356800000 | -3.944800000 |
| H | -7.172900000 | 5.077500000  | -4.544800000 |
| H | 7.252000000  | 5.109100000  | -4.293600000 |
| H | -4.101094000 | -2.666618000 | 2.881887000  |
| H | 3.964843000  | 3.004750000  | 2.662583000  |
| H | -4.111859000 | 2.914440000  | 2.636930000  |
| H | 3.948377000  | -2.768397000 | 2.911976000  |
| O | -3.663700000 | 1.472100000  | 1.337400000  |
| O | -3.610000000 | 1.255400000  | -1.456700000 |
| O | -3.654000000 | -1.258600000 | 1.542900000  |
| O | -2.127300000 | -2.310200000 | 2.835700000  |
| O | 1.970300000  | -2.521800000 | 2.683600000  |
| O | 2.090000000  | -2.742700000 | -2.140600000 |
| O | 3.548200000  | -1.286100000 | 1.640800000  |
| O | 3.614200000  | -1.448400000 | -1.083700000 |
| O | 3.557200000  | 1.485700000  | 1.438500000  |
| O | 3.591800000  | 1.320300000  | -1.285300000 |
| O | 2.046400000  | 2.547800000  | -2.386400000 |
| O | 1.986500000  | 2.771300000  | 2.435700000  |
| O | -2.020200000 | -2.554500000 | -2.444700000 |
| O | -3.604000000 | -1.474700000 | -1.248400000 |
| O | -2.134300000 | 2.562400000  | 2.592300000  |
| O | -2.045100000 | 2.316700000  | -2.694300000 |
| H | -1.963536000 | -2.855001000 | 0.235293000  |
| H | -1.038078000 | 1.817343000  | 4.294779000  |
| H | -0.136904000 | 0.516066000  | 4.148303000  |
| H | -0.581653000 | 1.309137000  | -4.502754000 |
| H | 0.005234000  | 4.068710000  | -0.386861000 |

|    |              |              |              |
|----|--------------|--------------|--------------|
| H  | 0.645328000  | 4.477172000  | 1.637204000  |
| H  | 0.939718000  | 4.176604000  | -1.662696000 |
| H  | 1.871362000  | 0.170074000  | 2.987662000  |
| H  | -1.963388000 | 2.886642000  | -0.092394000 |
| H  | -0.816268000 | -1.487349000 | 4.557514000  |
| H  | -0.694474000 | -1.761719000 | -4.153449000 |
| H  | 0.843432000  | -4.183759000 | 1.964364000  |
| H  | 0.728208000  | -4.462193000 | -1.343324000 |
| H  | 0.001970000  | -4.028576000 | 0.623177000  |
| O  | -1.119781000 | 0.121727000  | 1.545729000  |
| O  | -0.015070000 | -3.889859000 | 1.633473000  |
| O  | 1.035572000  | 1.509954000  | 0.019575000  |
| O  | 1.315625000  | 0.159200000  | 2.201255000  |
| O  | -0.077365000 | -1.087631000 | 4.086835000  |
| O  | -0.160255000 | 1.525340000  | 4.017422000  |
| O  | 0.172032000  | -1.784833000 | -3.732624000 |
| O  | 1.044344000  | -1.461657000 | 0.225942000  |
| O  | -1.422058000 | -2.058476000 | 0.226965000  |
| O  | -0.017103000 | -3.982175000 | -0.967970000 |
| O  | -0.087103000 | 3.997617000  | 1.235710000  |
| O  | 0.045802000  | 3.928150000  | -1.389659000 |
| O  | -1.425169000 | 2.088635000  | -0.053573000 |
| O  | 0.208081000  | 1.300228000  | -3.952820000 |
| O  | 1.368065000  | -0.117335000 | -2.015738000 |
| O  | -1.100909000 | -0.088907000 | -1.423334000 |
| Zr | 2.472970000  | 0.007613000  | 0.116210000  |
| Zr | -0.082241000 | -1.615454000 | 2.042712000  |
| Zr | -0.040682000 | 1.955945000  | 1.751985000  |
| Zr | -0.022887000 | 1.637478000  | -1.790053000 |
| Zr | -2.549583000 | 0.000045000  | 0.050931000  |
| Zr | 0.012961000  | -1.943628000 | -1.542291000 |
| Fe | 1.455465000  | -0.239277000 | -3.892751000 |
| O  | 1.730506000  | -0.755129000 | -5.780534000 |
| C  | 3.974556000  | 0.152413000  | -5.231478000 |
| C  | 5.141114000  | -0.799325000 | -5.197954000 |
| H  | 3.024145000  | -0.395403000 | -5.897449000 |
| H  | 4.141182000  | 1.093045000  | -5.786823000 |
| H  | 5.900445000  | -0.433940000 | -4.495887000 |
| H  | 4.836376000  | -1.791934000 | -4.852123000 |
| H  | 5.601066000  | -0.893819000 | -6.185110000 |
| O  | 3.303632000  | 0.319121000  | -4.096781000 |
| H  | 1.543156000  | -1.676323000 | -6.006022000 |

Fe-NU-1000 (Prod\_1)

Free Energy: -4287.870046

Electronic Energy: -4288.1044535

|   |              |              |              |
|---|--------------|--------------|--------------|
| C | 5.726500000  | -2.889200000 | -2.160200000 |
| C | -5.638900000 | -2.885100000 | -2.451400000 |

|   |              |              |              |
|---|--------------|--------------|--------------|
| C | 4.388900000  | -3.187700000 | -2.460000000 |
| C | -4.293000000 | -3.161900000 | -2.734600000 |
| C | 4.106400000  | -4.252600000 | -3.328500000 |
| C | -3.986000000 | -4.236300000 | -3.582700000 |
| C | 5.138200000  | -5.020700000 | -3.859400000 |
| C | -4.998200000 | -5.035200000 | -4.107600000 |
| C | 6.482800000  | -4.751200000 | -3.537700000 |
| C | -6.351100000 | -4.782200000 | -3.807100000 |
| C | 6.755800000  | -3.657500000 | -2.694900000 |
| C | -6.649700000 | -3.679700000 | -2.983400000 |
| C | 5.673400000  | 2.762000000  | -2.369400000 |
| C | -5.668800000 | 2.628900000  | -2.684600000 |
| C | 4.341400000  | 3.021300000  | -2.724800000 |
| C | -4.324800000 | 2.872000000  | -3.008000000 |
| C | 4.069900000  | 4.017800000  | -3.673300000 |
| C | -4.019400000 | 3.907100000  | -3.904900000 |
| C | 5.105900000  | 4.760700000  | -4.231200000 |
| C | -5.033000000 | 4.692700000  | -4.448900000 |
| C | 6.444700000  | 4.526400000  | -3.861700000 |
| C | -6.384200000 | 4.462600000  | -4.123400000 |
| C | 6.708200000  | 3.500400000  | -2.934600000 |
| C | -6.680500000 | 3.408600000  | -3.237600000 |
| C | -3.223400000 | -2.332300000 | -2.105800000 |
| C | -3.315200000 | -2.089500000 | 2.441200000  |
| C | -3.322900000 | 2.330100000  | 2.211500000  |
| C | 3.188500000  | 2.437000000  | 2.193700000  |
| C | 3.242000000  | 2.242000000  | -2.086000000 |
| C | 3.280300000  | -2.402400000 | -1.851700000 |
| C | -3.245500000 | 2.084800000  | -2.346700000 |
| C | 3.174600000  | -2.211100000 | 2.426600000  |
| H | 5.937000000  | -2.056700000 | -1.495800000 |
| H | -5.871700000 | -2.048200000 | -1.800500000 |
| H | 3.070800000  | -4.466900000 | -3.573300000 |
| H | -2.943100000 | -4.450000000 | -3.798200000 |
| H | 4.900900000  | -5.847200000 | -4.524400000 |
| H | -4.737200000 | -5.873100000 | -4.749000000 |
| H | 7.786000000  | -3.416500000 | -2.445100000 |
| H | -7.686200000 | -3.452500000 | -2.747200000 |
| H | 5.874800000  | 1.981600000  | -1.642500000 |
| H | -5.899000000 | 1.830200000  | -1.986300000 |
| H | 3.038900000  | 4.198500000  | -3.962800000 |
| H | -2.978300000 | 4.100400000  | -4.145000000 |
| H | 4.876900000  | 5.534100000  | -4.959800000 |
| H | -4.774300000 | 5.498300000  | -5.131200000 |
| H | 7.734600000  | 3.290500000  | -2.644500000 |
| H | -7.714900000 | 3.205600000  | -2.972200000 |
| H | -7.139900000 | -5.409200000 | -4.210200000 |
| H | 7.286100000  | -5.356800000 | -3.944800000 |
| H | -7.172900000 | 5.077500000  | -4.544800000 |

|   |              |              |              |
|---|--------------|--------------|--------------|
| H | 7.252000000  | 5.109100000  | -4.293600000 |
| H | -4.101094000 | -2.666618000 | 2.881887000  |
| H | 3.964843000  | 3.004750000  | 2.662583000  |
| H | -4.111859000 | 2.914440000  | 2.636930000  |
| H | 3.948377000  | -2.768397000 | 2.911976000  |
| O | -3.663700000 | 1.472100000  | 1.337400000  |
| O | -3.610000000 | 1.255400000  | -1.456700000 |
| O | -3.654000000 | -1.258600000 | 1.542900000  |
| O | -2.127300000 | -2.310200000 | 2.835700000  |
| O | 1.970300000  | -2.521800000 | 2.683600000  |
| O | 2.090000000  | -2.742700000 | -2.140600000 |
| O | 3.548200000  | -1.286100000 | 1.640800000  |
| O | 3.614200000  | -1.448400000 | -1.083700000 |
| O | 3.557200000  | 1.485700000  | 1.438500000  |
| O | 3.591800000  | 1.320300000  | -1.285300000 |
| O | 2.046400000  | 2.547800000  | -2.386400000 |
| O | 1.986500000  | 2.771300000  | 2.435700000  |
| O | -2.020200000 | -2.554500000 | -2.444700000 |
| O | -3.604000000 | -1.474700000 | -1.248400000 |
| O | -2.134300000 | 2.562400000  | 2.592300000  |
| O | -2.045100000 | 2.316700000  | -2.694300000 |
| H | -1.970771000 | -2.846667000 | 0.217442000  |
| H | -1.043446000 | 1.807048000  | 4.292066000  |
| H | -0.135854000 | 0.510738000  | 4.144693000  |
| H | -0.586469000 | 1.483463000  | -4.509205000 |
| H | 0.002241000  | 4.062075000  | -0.389833000 |
| H | 0.645521000  | 4.475631000  | 1.640963000  |
| H | 0.937778000  | 4.180086000  | -1.658951000 |
| H | 1.881178000  | 0.163060000  | 2.968391000  |
| H | -1.965213000 | 2.878910000  | -0.103935000 |
| H | -0.820741000 | -1.487115000 | 4.554120000  |
| H | 0.894637000  | -2.739594000 | -3.946727000 |
| H | 0.843379000  | -4.180109000 | 1.931148000  |
| H | 0.790120000  | -4.403383000 | -1.311283000 |
| H | -0.003466000 | -4.003770000 | 0.593857000  |
| O | -1.118838000 | 0.120575000  | 1.539442000  |
| O | -0.019185000 | -3.888385000 | 1.609398000  |
| O | 1.036304000  | 1.530040000  | 0.025898000  |
| O | 1.310001000  | 0.156426000  | 2.193230000  |
| O | -0.078873000 | -1.091309000 | 4.084986000  |
| O | -0.162725000 | 1.520923000  | 4.017987000  |
| O | 0.236950000  | -2.042579000 | -3.824025000 |
| O | 1.035740000  | -1.479958000 | 0.221540000  |
| O | -1.427264000 | -2.051735000 | 0.222318000  |
| O | -0.001102000 | -3.956599000 | -0.993980000 |
| O | -0.093800000 | 4.002853000  | 1.244152000  |
| O | 0.045547000  | 3.924448000  | -1.390837000 |
| O | -1.425923000 | 2.082423000  | -0.053810000 |
| O | 0.199351000  | 1.402126000  | -3.958953000 |

|    |              |              |              |
|----|--------------|--------------|--------------|
| O  | 1.325544000  | -0.106748000 | -2.017280000 |
| O  | -1.137511000 | -0.094371000 | -1.446654000 |
| Zr | 2.428511000  | 0.006460000  | 0.108605000  |
| Zr | -0.089542000 | -1.618821000 | 2.038034000  |
| Zr | -0.046322000 | 1.960371000  | 1.752420000  |
| Zr | -0.021760000 | 1.617112000  | -1.799135000 |
| Zr | -2.558429000 | -0.002439000 | 0.046787000  |
| Zr | -0.002387000 | -1.904058000 | -1.572900000 |
| Fe | 1.228273000  | -0.289966000 | -4.033727000 |
| O  | 0.304503000  | -0.644464000 | -6.134343000 |
| C  | 4.148792000  | -1.135766000 | -4.709725000 |
| C  | 4.905006000  | -0.086078000 | -3.999237000 |
| H  | 4.694794000  | -1.935915000 | -5.236973000 |
| H  | 0.941803000  | -1.030759000 | -6.743180000 |
| H  | 4.676781000  | 0.896541000  | -4.432500000 |
| H  | 4.578279000  | -0.040454000 | -2.949944000 |
| H  | 5.982735000  | -0.249650000 | -4.042370000 |
| O  | 2.907314000  | -1.163636000 | -4.751307000 |
| H  | -0.144818000 | -1.404112000 | -5.721373000 |

### Reaction without N<sub>2</sub>O

Fe-NU-1000 (Ads\_2)

Free Energy: -4212.647726

Electronic Energy: -4212.8829931

|   |              |              |              |
|---|--------------|--------------|--------------|
| C | 5.726500000  | -2.889200000 | -2.160200000 |
| C | -5.638900000 | -2.885100000 | -2.451400000 |
| C | 4.388900000  | -3.187700000 | -2.460000000 |
| C | -4.293000000 | -3.161900000 | -2.734600000 |
| C | 4.106400000  | -4.252600000 | -3.328500000 |
| C | -3.986000000 | -4.236300000 | -3.582700000 |
| C | 5.138200000  | -5.020700000 | -3.859400000 |
| C | -4.998200000 | -5.035200000 | -4.107600000 |
| C | 6.482800000  | -4.751200000 | -3.537700000 |
| C | -6.351100000 | -4.782200000 | -3.807100000 |
| C | 6.755800000  | -3.657500000 | -2.694900000 |
| C | -6.649700000 | -3.679700000 | -2.983400000 |
| C | 5.673400000  | 2.762000000  | -2.369400000 |
| C | -5.668800000 | 2.628900000  | -2.684600000 |
| C | 4.341400000  | 3.021300000  | -2.724800000 |
| C | -4.324800000 | 2.872000000  | -3.008000000 |
| C | 4.069900000  | 4.017800000  | -3.673300000 |
| C | -4.019400000 | 3.907100000  | -3.904900000 |
| C | 5.105900000  | 4.760700000  | -4.231200000 |
| C | -5.033000000 | 4.692700000  | -4.448900000 |
| C | 6.444700000  | 4.526400000  | -3.861700000 |
| C | -6.384200000 | 4.462600000  | -4.123400000 |
| C | 6.708200000  | 3.500400000  | -2.934600000 |
| C | -6.680500000 | 3.408600000  | -3.237600000 |
| C | -3.223400000 | -2.332300000 | -2.105800000 |
| C | -3.315200000 | -2.089500000 | 2.441200000  |
| C | -3.322900000 | 2.330100000  | 2.211500000  |
| C | 3.188500000  | 2.437000000  | 2.193700000  |
| C | 3.242000000  | 2.242000000  | -2.086000000 |

|   |              |              |              |
|---|--------------|--------------|--------------|
| C | 3.280300000  | -2.402400000 | -1.851700000 |
| C | -3.245500000 | 2.084800000  | -2.346700000 |
| C | 3.174600000  | -2.211100000 | 2.426600000  |
| H | 5.937000000  | -2.056700000 | -1.495800000 |
| H | -5.871700000 | -2.048200000 | -1.800500000 |
| H | 3.070800000  | -4.466900000 | -3.573300000 |
| H | -2.943100000 | -4.450000000 | -3.798200000 |
| H | 4.900900000  | -5.847200000 | -4.524400000 |
| H | -4.737200000 | -5.873100000 | -4.749000000 |
| H | 7.786000000  | -3.416500000 | -2.445100000 |
| H | -7.686200000 | -3.452500000 | -2.747200000 |
| H | 5.874800000  | 1.981600000  | -1.642500000 |
| H | -5.899000000 | 1.830200000  | -1.986300000 |
| H | 3.038900000  | 4.198500000  | -3.962800000 |
| H | -2.978300000 | 4.100400000  | -4.145000000 |
| H | 4.876900000  | 5.534100000  | -4.959800000 |
| H | -4.774300000 | 5.498300000  | -5.131200000 |
| H | 7.734600000  | 3.290500000  | -2.644500000 |
| H | -7.714900000 | 3.205600000  | -2.972200000 |
| H | -7.139900000 | -5.409200000 | -4.210200000 |
| H | 7.286100000  | -5.356800000 | -3.944800000 |
| H | -7.172900000 | 5.077500000  | -4.544800000 |
| H | 7.252000000  | 5.109100000  | -4.293600000 |
| H | -4.101094000 | -2.666618000 | 2.881887000  |
| H | 3.964843000  | 3.004750000  | 2.662583000  |
| H | -4.111859000 | 2.914440000  | 2.636930000  |
| H | 3.948377000  | -2.768397000 | 2.911976000  |
| O | -3.663700000 | 1.472100000  | 1.337400000  |
| O | -3.610000000 | 1.255400000  | -1.456700000 |
| O | -3.654000000 | -1.258600000 | 1.542900000  |
| O | -2.127300000 | -2.310200000 | 2.835700000  |
| O | 1.970300000  | -2.521800000 | 2.683600000  |
| O | 2.090000000  | -2.742700000 | -2.140600000 |
| O | 3.548200000  | -1.286100000 | 1.640800000  |
| O | 3.614200000  | -1.448400000 | -1.083700000 |
| O | 3.557200000  | 1.485700000  | 1.438500000  |
| O | 3.591800000  | 1.320300000  | -1.285300000 |
| O | 2.046400000  | 2.547800000  | -2.386400000 |
| O | 1.986500000  | 2.771300000  | 2.435700000  |
| O | -2.020200000 | -2.554500000 | -2.444700000 |
| O | -3.604000000 | -1.474700000 | -1.248400000 |
| O | -2.134300000 | 2.562400000  | 2.592300000  |
| O | -2.045100000 | 2.316700000  | -2.694300000 |
| H | -1.964756000 | -2.859643000 | 0.230329000  |
| H | -1.045583000 | 1.811491000  | 4.305331000  |
| H | -0.136075000 | 0.517403000  | 4.160129000  |
| H | -0.566501000 | 1.466729000  | -4.498674000 |
| H | -0.006017000 | 4.052076000  | -0.388373000 |
| H | 0.639591000  | 4.480165000  | 1.640724000  |
| H | 0.932089000  | 4.172429000  | -1.653155000 |
| H | 1.883383000  | 0.168635000  | 2.981694000  |
| H | -1.967386000 | 2.871946000  | -0.106998000 |
| H | -0.819790000 | -1.485542000 | 4.580302000  |
| H | -0.715458000 | -1.808565000 | -4.142225000 |
| H | 0.845481000  | -4.178561000 | 1.966384000  |
| H | 0.737422000  | -4.451585000 | -1.335179000 |



|    |              |              |              |
|----|--------------|--------------|--------------|
| H  | 0.000337000  | -4.023706000 | 0.630287000  |
| O  | -1.117928000 | 0.118229000  | 1.549420000  |
| O  | -0.020592000 | -3.898236000 | 1.642985000  |
| O  | 1.037630000  | 1.547592000  | 0.044607000  |
| O  | 1.307636000  | 0.158145000  | 2.209970000  |
| O  | -0.080547000 | -1.090161000 | 4.106762000  |
| O  | -0.164941000 | 1.526217000  | 4.030478000  |
| O  | 0.173949000  | -1.832516000 | -3.771519000 |
| O  | 1.038084000  | -1.501730000 | 0.263883000  |
| O  | -1.426406000 | -2.061112000 | 0.233038000  |
| O  | -0.010622000 | -3.973867000 | -0.962880000 |
| O  | -0.102335000 | 4.005936000  | 1.250596000  |
| O  | 0.040233000  | 3.912754000  | -1.388788000 |
| O  | -1.427168000 | 2.076497000  | -0.051317000 |
| O  | 0.215262000  | 1.343326000  | -3.953495000 |
| O  | 1.343904000  | -0.111310000 | -1.901268000 |
| O  | -1.132981000 | -0.105478000 | -1.431213000 |
| Zr | 2.414389000  | 0.002179000  | 0.127444000  |
| Zr | -0.092469000 | -1.622423000 | 2.062083000  |
| Zr | -0.047936000 | 1.964213000  | 1.762041000  |
| Zr | -0.018770000 | 1.598231000  | -1.789767000 |
| Zr | -2.552922000 | -0.001480000 | 0.053316000  |
| Zr | 0.017221000  | -1.928116000 | -1.528956000 |
| Fe | 1.368805000  | -0.309440000 | -3.906558000 |
| C  | 4.408826000  | 0.128243000  | -4.839019000 |
| C  | 3.662692000  | 0.423197000  | -6.111914000 |
| H  | 4.998444000  | 0.992401000  | -4.510513000 |
| H  | 5.079007000  | -0.732980000 | -4.947983000 |
| H  | 3.039411000  | -0.431806000 | -6.400576000 |
| H  | 3.018471000  | 1.301591000  | -5.991363000 |
| H  | 4.351970000  | 0.620624000  | -6.935885000 |
| O  | 3.426798000  | -0.178140000 | -3.834417000 |
| H  | 3.753879000  | -0.075148000 | -2.920408000 |

Fe-NU-1000 (TS1\_2)

Free Energy: -4212.63175

Electronic Energy: -4212.8651669

|   |              |              |              |
|---|--------------|--------------|--------------|
| C | 5.726500000  | -2.889200000 | -2.160200000 |
| C | -5.638900000 | -2.885100000 | -2.451400000 |
| C | 4.388900000  | -3.187700000 | -2.460000000 |
| C | -4.293000000 | -3.161900000 | -2.734600000 |
| C | 4.106400000  | -4.252600000 | -3.328500000 |
| C | -3.986000000 | -4.236300000 | -3.582700000 |
| C | 5.138200000  | -5.020700000 | -3.859400000 |
| C | -4.998200000 | -5.035200000 | -4.107600000 |
| C | 6.482800000  | -4.751200000 | -3.537700000 |
| C | -6.351100000 | -4.782200000 | -3.807100000 |
| C | 6.755800000  | -3.657500000 | -2.694900000 |
| C | -6.649700000 | -3.679700000 | -2.983400000 |
| C | 5.673400000  | 2.762000000  | -2.369400000 |
| C | -5.668800000 | 2.628900000  | -2.684600000 |
| C | 4.341400000  | 3.021300000  | -2.724800000 |
| C | -4.324800000 | 2.872000000  | -3.008000000 |
| C | 4.069900000  | 4.017800000  | -3.673300000 |
| C | -4.019400000 | 3.907100000  | -3.904900000 |
| C | 5.105900000  | 4.760700000  | -4.231200000 |

|   |              |              |              |
|---|--------------|--------------|--------------|
| C | -5.033000000 | 4.692700000  | -4.448900000 |
| C | 6.444700000  | 4.526400000  | -3.861700000 |
| C | -6.384200000 | 4.462600000  | -4.123400000 |
| C | 6.708200000  | 3.500400000  | -2.934600000 |
| C | -6.680500000 | 3.408600000  | -3.237600000 |
| C | -3.223400000 | -2.332300000 | -2.105800000 |
| C | -3.315200000 | -2.089500000 | 2.441200000  |
| C | -3.322900000 | 2.330100000  | 2.211500000  |
| C | 3.188500000  | 2.437000000  | 2.193700000  |
| C | 3.242000000  | 2.242000000  | -2.086000000 |
| C | 3.280300000  | -2.402400000 | -1.851700000 |
| C | -3.245500000 | 2.084800000  | -2.346700000 |
| C | 3.174600000  | -2.211100000 | 2.426600000  |
| H | 5.937000000  | -2.056700000 | -1.495800000 |
| H | -5.871700000 | -2.048200000 | -1.800500000 |
| H | 3.070800000  | -4.466900000 | -3.573300000 |
| H | -2.943100000 | -4.450000000 | -3.798200000 |
| H | 4.900900000  | -5.847200000 | -4.524400000 |
| H | -4.737200000 | -5.873100000 | -4.749000000 |
| H | 7.786000000  | -3.416500000 | -2.445100000 |
| H | -7.686200000 | -3.452500000 | -2.747200000 |
| H | 5.874800000  | 1.981600000  | -1.642500000 |
| H | -5.899000000 | 1.830200000  | -1.986300000 |
| H | 3.038900000  | 4.198500000  | -3.962800000 |
| H | -2.978300000 | 4.100400000  | -4.145000000 |
| H | 4.876900000  | 5.534100000  | -4.959800000 |
| H | -4.774300000 | 5.498300000  | -5.131200000 |
| H | 7.734600000  | 3.290500000  | -2.644500000 |
| H | -7.714900000 | 3.205600000  | -2.972200000 |
| H | -7.139900000 | -5.409200000 | -4.210200000 |
| H | 7.286100000  | -5.356800000 | -3.944800000 |
| H | -7.172900000 | 5.077500000  | -4.544800000 |
| H | 7.252000000  | 5.109100000  | -4.293600000 |
| H | -4.101094000 | -2.666618000 | 2.881887000  |
| H | 3.964843000  | 3.004750000  | 2.662583000  |
| H | -4.111859000 | 2.914440000  | 2.636930000  |
| H | 3.948377000  | -2.768397000 | 2.911976000  |
| O | -3.663700000 | 1.472100000  | 1.337400000  |
| O | -3.610000000 | 1.255400000  | -1.456700000 |
| O | -3.654000000 | -1.258600000 | 1.542900000  |
| O | -2.127300000 | -2.310200000 | 2.835700000  |
| O | 1.970300000  | -2.521800000 | 2.683600000  |
| O | 2.090000000  | -2.742700000 | -2.140600000 |
| O | 3.548200000  | -1.286100000 | 1.640800000  |
| O | 3.614200000  | -1.448400000 | -1.083700000 |
| O | 3.557200000  | 1.485700000  | 1.438500000  |
| O | 3.591800000  | 1.320300000  | -1.285300000 |
| O | 2.046400000  | 2.547800000  | -2.386400000 |
| O | 1.986500000  | 2.771300000  | 2.435700000  |
| O | -2.020200000 | -2.554500000 | -2.444700000 |
| O | -3.604000000 | -1.474700000 | -1.248400000 |
| O | -2.134300000 | 2.562400000  | 2.592300000  |
| O | -2.045100000 | 2.316700000  | -2.694300000 |
| H | -1.953948000 | -2.854450000 | 0.220090000  |
| H | -1.037829000 | 1.817085000  | 4.285997000  |
| H | -0.137657000 | 0.515132000  | 4.142104000  |

|    |              |              |              |
|----|--------------|--------------|--------------|
| H  | -0.747299000 | 1.739746000  | -4.406354000 |
| H  | 0.001913000  | 4.061107000  | -0.395826000 |
| H  | 0.640740000  | 4.478672000  | 1.627477000  |
| H  | 0.927789000  | 4.190583000  | -1.674795000 |
| H  | 1.869844000  | 0.166136000  | 2.987812000  |
| H  | -1.958325000 | 2.871128000  | -0.108624000 |
| H  | -0.817738000 | -1.488334000 | 4.553961000  |
| H  | -0.842092000 | -2.210869000 | -4.079690000 |
| H  | 0.843376000  | -4.193329000 | 1.955945000  |
| H  | 0.726932000  | -4.468023000 | -1.357959000 |
| H  | 0.004883000  | -4.031806000 | 0.613820000  |
| O  | -1.114541000 | 0.117853000  | 1.539097000  |
| O  | -0.012647000 | -3.893693000 | 1.624014000  |
| O  | 1.043375000  | 1.508759000  | 0.017432000  |
| O  | 1.315879000  | 0.155361000  | 2.200074000  |
| O  | -0.078500000 | -1.090545000 | 4.082166000  |
| O  | -0.159711000 | 1.523894000  | 4.010428000  |
| O  | 0.068661000  | -2.012847000 | -3.826951000 |
| O  | 1.047519000  | -1.467536000 | 0.222246000  |
| O  | -1.411405000 | -2.058436000 | 0.214925000  |
| O  | -0.014211000 | -3.984342000 | -0.978047000 |
| O  | -0.088211000 | 3.994967000  | 1.224712000  |
| O  | 0.041554000  | 3.921246000  | -1.398924000 |
| O  | -1.416268000 | 2.075802000  | -0.065533000 |
| O  | 0.102716000  | 1.499625000  | -4.020805000 |
| O  | 1.373549000  | -0.118243000 | -2.061097000 |
| O  | -1.081374000 | -0.100859000 | -1.444919000 |
| Zr | 2.466018000  | -0.000029000 | 0.130746000  |
| Zr | -0.082968000 | -1.622050000 | 2.040042000  |
| Zr | -0.038734000 | 1.955421000  | 1.744941000  |
| Zr | -0.004937000 | 1.629228000  | -1.811205000 |
| Zr | -2.537195000 | -0.003630000 | 0.042583000  |
| Zr | 0.041761000  | -1.953591000 | -1.562889000 |
| Fe | 0.853960000  | -0.312835000 | -4.227548000 |
| C  | 4.016385000  | 0.072758000  | -4.435441000 |
| C  | 3.770243000  | 1.106713000  | -5.511591000 |
| H  | 4.628389000  | 0.488833000  | -3.622588000 |
| H  | 4.581503000  | -0.776145000 | -4.848344000 |
| H  | 3.243912000  | 0.659925000  | -6.363390000 |
| H  | 3.155018000  | 1.926344000  | -5.125214000 |
| H  | 4.708843000  | 1.534599000  | -5.880081000 |
| O  | 2.807360000  | -0.409967000 | -3.893599000 |
| H  | 2.361081000  | -0.189271000 | -2.794195000 |

Fe-NU-1000 (Int\_2)

Free Energy: -4212.646402

Electronic Energy: -4212.8825188

|   |              |              |              |
|---|--------------|--------------|--------------|
| C | 5.726500000  | -2.889200000 | -2.160200000 |
| C | -5.638900000 | -2.885100000 | -2.451400000 |
| C | 4.388900000  | -3.187699000 | -2.460001000 |
| C | -4.293000000 | -3.161896000 | -2.734604000 |
| C | 4.106400000  | -4.252600000 | -3.328500000 |
| C | -3.986000000 | -4.236300000 | -3.582700000 |
| C | 5.138200000  | -5.020700000 | -3.859400000 |
| C | -4.998200000 | -5.035200000 | -4.107600000 |
| C | 6.482800000  | -4.751200000 | -3.537700000 |

|   |              |              |              |
|---|--------------|--------------|--------------|
| C | -6.351100000 | -4.782200000 | -3.807100000 |
| C | 6.755800000  | -3.657500000 | -2.694900000 |
| C | -6.649700000 | -3.679700000 | -2.983400000 |
| C | 5.673400000  | 2.762000000  | -2.369400000 |
| C | -5.668800000 | 2.628900000  | -2.684600000 |
| C | 4.341400000  | 3.021300000  | -2.724800000 |
| C | -4.324799000 | 2.872005000  | -3.007995000 |
| C | 4.069900000  | 4.017800000  | -3.673300000 |
| C | -4.019400000 | 3.907100000  | -3.904900000 |
| C | 5.105900000  | 4.760700000  | -4.231200000 |
| C | -5.033000000 | 4.692700000  | -4.448900000 |
| C | 6.444700000  | 4.526400000  | -3.861700000 |
| C | -6.384200000 | 4.462600000  | -4.123400000 |
| C | 6.708200000  | 3.500400000  | -2.934600000 |
| C | -6.680500000 | 3.408600000  | -3.237600000 |
| C | -3.223399000 | -2.332291000 | -2.105809000 |
| C | -3.315205000 | -2.089516000 | 2.441193000  |
| C | -3.322902000 | 2.330108000  | 2.211496000  |
| C | 3.188514000  | 2.437000000  | 2.193705000  |
| C | 3.241990000  | 2.241978000  | -2.086007000 |
| C | 3.280290000  | -2.402372000 | -1.851704000 |
| C | -3.245499000 | 2.084799000  | -2.346708000 |
| C | 3.174608000  | -2.211099000 | 2.426603000  |
| H | 5.937000000  | -2.056700000 | -1.495800000 |
| H | -5.871700000 | -2.048200000 | -1.800500000 |
| H | 3.070800000  | -4.466900000 | -3.573300000 |
| H | -2.943100000 | -4.450000000 | -3.798200000 |
| H | 4.900900000  | -5.847200000 | -4.524400000 |
| H | -4.737200000 | -5.873100000 | -4.749000000 |
| H | 7.786000000  | -3.416500000 | -2.445100000 |
| H | -7.686200000 | -3.452500000 | -2.747200000 |
| H | 5.874800000  | 1.981600000  | -1.642500000 |
| H | -5.899000000 | 1.830200000  | -1.986300000 |
| H | 3.038900000  | 4.198500000  | -3.962800000 |
| H | -2.978300000 | 4.100400000  | -4.145000000 |
| H | 4.876900000  | 5.534100000  | -4.959800000 |
| H | -4.774300000 | 5.498300000  | -5.131200000 |
| H | 7.734600000  | 3.290500000  | -2.644500000 |
| H | -7.714900000 | 3.205600000  | -2.972200000 |
| H | -7.139900000 | -5.409200000 | -4.210200000 |
| H | 7.286100000  | -5.356800000 | -3.944800000 |
| H | -7.172900000 | 5.077500000  | -4.544800000 |
| H | 7.252000000  | 5.109100000  | -4.293600000 |
| H | -4.101094000 | -2.666620000 | 2.881885000  |
| H | 3.964843000  | 3.004752000  | 2.662581000  |
| H | -4.111858000 | 2.914443000  | 2.636927000  |
| H | 3.948377000  | -2.768399000 | 2.911974000  |
| O | -3.663725000 | 1.472082000  | 1.337382000  |
| O | -3.609978000 | 1.255408000  | -1.456696000 |
| O | -3.654040000 | -1.258598000 | 1.542879000  |
| O | -2.127263000 | -2.310288000 | 2.835717000  |
| O | 1.970321000  | -2.521831000 | 2.683578000  |
| O | 2.090037000  | -2.742397000 | -2.140549000 |
| O | 3.548206000  | -1.286047000 | 1.640791000  |
| O | 3.614102000  | -1.448414000 | -1.083670000 |
| O | 3.557245000  | 1.485627000  | 1.438478000  |

|    |              |              |              |
|----|--------------|--------------|--------------|
| O  | 3.591680000  | 1.320340000  | -1.285269000 |
| O  | 2.046441000  | 2.547498000  | -2.386393000 |
| O  | 1.986510000  | 2.771324000  | 2.435673000  |
| O  | -2.020200000 | -2.554226000 | -2.444679000 |
| O  | -3.603984000 | -1.474720000 | -1.248404000 |
| O  | -2.134276000 | 2.562462000  | 2.592297000  |
| O  | -2.045076000 | 2.316463000  | -2.694294000 |
| H  | -1.966958000 | -2.847738000 | 0.220829000  |
| H  | -1.034267000 | 1.816604000  | 4.287560000  |
| H  | -0.138372000 | 0.511789000  | 4.138200000  |
| H  | -0.780787000 | 1.495023000  | -4.379982000 |
| H  | -0.002396000 | 4.072286000  | -0.380212000 |
| H  | 0.637625000  | 4.484656000  | 1.632799000  |
| H  | 0.919399000  | 4.218825000  | -1.664039000 |
| H  | 1.858420000  | 0.166382000  | 3.000852000  |
| H  | -1.970474000 | 2.883380000  | -0.091769000 |
| H  | -0.811280000 | -1.490702000 | 4.549193000  |
| H  | -0.793700000 | -2.030829000 | -4.131856000 |
| H  | 0.838023000  | -4.200896000 | 1.949043000  |
| H  | 0.711458000  | -4.484864000 | -1.364279000 |
| H  | -0.002184000 | -4.034141000 | 0.608661000  |
| O  | -1.118637000 | 0.121353000  | 1.546203000  |
| O  | -0.016067000 | -3.895183000 | 1.618124000  |
| O  | 1.038336000  | 1.507065000  | 0.017316000  |
| O  | 1.317196000  | 0.156334000  | 2.204147000  |
| O  | -0.074100000 | -1.091166000 | 4.075645000  |
| O  | -0.157779000 | 1.521696000  | 4.008760000  |
| O  | 0.064033000  | -1.800060000 | -3.761127000 |
| O  | 1.042262000  | -1.461609000 | 0.219989000  |
| O  | -1.415174000 | -2.058132000 | 0.208908000  |
| O  | -0.025445000 | -3.993200000 | -0.986241000 |
| O  | -0.087416000 | 3.999691000  | 1.224601000  |
| O  | 0.036841000  | 3.938642000  | -1.387654000 |
| O  | -1.422107000 | 2.091688000  | -0.064903000 |
| O  | 0.075989000  | 1.339034000  | -3.968417000 |
| O  | 1.418647000  | -0.121961000 | -2.012057000 |
| O  | -1.033377000 | -0.081091000 | -1.409936000 |
| Zr | 2.466233000  | -0.002476000 | 0.164228000  |
| Zr | -0.085499000 | -1.623732000 | 2.031192000  |
| Zr | -0.041070000 | 1.956163000  | 1.743467000  |
| Zr | -0.019749000 | 1.662650000  | -1.816320000 |
| Zr | -2.530759000 | -0.003531000 | 0.043454000  |
| Zr | 0.029173000  | -1.972729000 | -1.591506000 |
| Fe | 1.202938000  | -0.267199000 | -4.369306000 |
| C  | 4.126209000  | 0.022069000  | -4.727883000 |
| C  | 3.812098000  | 1.180623000  | -5.653135000 |
| H  | 4.627636000  | 0.395549000  | -3.816151000 |
| H  | 4.848819000  | -0.658353000 | -5.208422000 |
| H  | 3.414855000  | 0.816613000  | -6.607671000 |
| H  | 3.055069000  | 1.835182000  | -5.200060000 |
| H  | 4.696274000  | 1.793844000  | -5.860710000 |
| O  | 2.987175000  | -0.706908000 | -4.371765000 |
| H  | 2.277110000  | -0.191977000 | -2.472459000 |

Fe-NU-1000 (TS2\_2)

Free Energy: -4212.609396

Electronic Energy: -4212.8405911

|   |              |              |              |
|---|--------------|--------------|--------------|
| C | 5.726500000  | -2.889200000 | -2.160200000 |
| C | -5.638900000 | -2.885100000 | -2.451400000 |
| C | 4.388900000  | -3.187700000 | -2.460000000 |
| C | -4.293000000 | -3.161900000 | -2.734600000 |
| C | 4.106400000  | -4.252600000 | -3.328500000 |
| C | -3.986000000 | -4.236300000 | -3.582700000 |
| C | 5.138200000  | -5.020700000 | -3.859400000 |
| C | -4.998200000 | -5.035200000 | -4.107600000 |
| C | 6.482800000  | -4.751200000 | -3.537700000 |
| C | -6.351100000 | -4.782200000 | -3.807100000 |
| C | 6.755800000  | -3.657500000 | -2.694900000 |
| C | -6.649700000 | -3.679700000 | -2.983400000 |
| C | 5.673400000  | 2.762000000  | -2.369400000 |
| C | -5.668800000 | 2.628900000  | -2.684600000 |
| C | 4.341400000  | 3.021300000  | -2.724800000 |
| C | -4.324800000 | 2.872000000  | -3.008000000 |
| C | 4.069900000  | 4.017800000  | -3.673300000 |
| C | -4.019400000 | 3.907100000  | -3.904900000 |
| C | 5.105900000  | 4.760700000  | -4.231200000 |
| C | -5.033000000 | 4.692700000  | -4.448900000 |
| C | 6.444700000  | 4.526400000  | -3.861700000 |
| C | -6.384200000 | 4.462600000  | -4.123400000 |
| C | 6.708200000  | 3.500400000  | -2.934600000 |
| C | -6.680500000 | 3.408600000  | -3.237600000 |
| C | -3.223400000 | -2.332300000 | -2.105800000 |
| C | -3.315200000 | -2.089500000 | 2.441200000  |
| C | -3.322900000 | 2.330100000  | 2.211500000  |
| C | 3.188500000  | 2.437000000  | 2.193700000  |
| C | 3.242000000  | 2.242000000  | -2.086000000 |
| C | 3.280300000  | -2.402400000 | -1.851700000 |
| C | -3.245500000 | 2.084800000  | -2.346700000 |
| C | 3.174600000  | -2.211100000 | 2.426600000  |
| H | 5.937000000  | -2.056700000 | -1.495800000 |
| H | -5.871700000 | -2.048200000 | -1.800500000 |
| H | 3.070800000  | -4.466900000 | -3.573300000 |
| H | -2.943100000 | -4.450000000 | -3.798200000 |
| H | 4.900900000  | -5.847200000 | -4.524400000 |
| H | -4.737200000 | -5.873100000 | -4.749000000 |
| H | 7.786000000  | -3.416500000 | -2.445100000 |
| H | -7.686200000 | -3.452500000 | -2.747200000 |
| H | 5.874800000  | 1.981600000  | -1.642500000 |
| H | -5.899000000 | 1.830200000  | -1.986300000 |
| H | 3.038900000  | 4.198500000  | -3.962800000 |
| H | -2.978300000 | 4.100400000  | -4.145000000 |
| H | 4.876900000  | 5.534100000  | -4.959800000 |
| H | -4.774300000 | 5.498300000  | -5.131200000 |
| H | 7.734600000  | 3.290500000  | -2.644500000 |
| H | -7.714900000 | 3.205600000  | -2.972200000 |
| H | -7.139900000 | -5.409200000 | -4.210200000 |
| H | 7.286100000  | -5.356800000 | -3.944800000 |
| H | -7.172900000 | 5.077500000  | -4.544800000 |

|    |              |              |              |
|----|--------------|--------------|--------------|
| H  | 7.252000000  | 5.109100000  | -4.293600000 |
| H  | -4.101094000 | -2.666618000 | 2.881887000  |
| H  | 3.964843000  | 3.004750000  | 2.662583000  |
| H  | -4.111859000 | 2.914440000  | 2.636930000  |
| H  | 3.948377000  | -2.768397000 | 2.911976000  |
| O  | -3.663700000 | 1.472100000  | 1.337400000  |
| O  | -3.610000000 | 1.255400000  | -1.456700000 |
| O  | -3.654000000 | -1.258600000 | 1.542900000  |
| O  | -2.127300000 | -2.310200000 | 2.835700000  |
| O  | 1.970300000  | -2.521800000 | 2.683600000  |
| O  | 2.090000000  | -2.742700000 | -2.140600000 |
| O  | 3.548200000  | -1.286100000 | 1.640800000  |
| O  | 3.614200000  | -1.448400000 | -1.083700000 |
| O  | 3.557200000  | 1.485700000  | 1.438500000  |
| O  | 3.591800000  | 1.320300000  | -1.285300000 |
| O  | 2.046400000  | 2.547800000  | -2.386400000 |
| O  | 1.986500000  | 2.771300000  | 2.435700000  |
| O  | -2.020200000 | -2.554500000 | -2.444700000 |
| O  | -3.604000000 | -1.474700000 | -1.248400000 |
| O  | -2.134300000 | 2.562400000  | 2.592300000  |
| O  | -2.045100000 | 2.316700000  | -2.694300000 |
| H  | -1.959709000 | -2.851547000 | 0.220623000  |
| H  | -1.034940000 | 1.814945000  | 4.296370000  |
| H  | -0.137614000 | 0.511392000  | 4.144968000  |
| H  | -0.779539000 | 1.605790000  | -4.351741000 |
| H  | -0.000386000 | 4.070594000  | -0.379404000 |
| H  | 0.637888000  | 4.483882000  | 1.635562000  |
| H  | 0.934491000  | 4.199869000  | -1.654175000 |
| H  | 1.863047000  | 0.165206000  | 2.997374000  |
| H  | -1.966726000 | 2.883422000  | -0.093188000 |
| H  | -0.813423000 | -1.491214000 | 4.554119000  |
| H  | -0.807950000 | -2.126750000 | -4.093026000 |
| H  | 0.842817000  | -4.195162000 | 1.946497000  |
| H  | 0.727399000  | -4.464003000 | -1.362940000 |
| H  | -0.000034000 | -4.028904000 | 0.609013000  |
| O  | -1.119026000 | 0.121075000  | 1.547493000  |
| O  | -0.013942000 | -3.894006000 | 1.617926000  |
| O  | 1.037193000  | 1.514027000  | 0.026683000  |
| O  | 1.316213000  | 0.156399000  | 2.204562000  |
| O  | -0.075709000 | -1.091512000 | 4.081570000  |
| O  | -0.158729000 | 1.521215000  | 4.015805000  |
| O  | 0.069525000  | -1.852826000 | -3.796614000 |
| O  | 1.041988000  | -1.463949000 | 0.224003000  |
| O  | -1.413711000 | -2.057943000 | 0.212379000  |
| O  | -0.019404000 | -3.981461000 | -0.992625000 |
| O  | -0.090074000 | 4.000080000  | 1.231109000  |
| O  | 0.044624000  | 3.934476000  | -1.385367000 |
| O  | -1.422416000 | 2.089206000  | -0.060414000 |
| O  | 0.067529000  | 1.340017000  | -3.972334000 |
| O  | 1.385786000  | -0.109277000 | -1.962021000 |
| O  | -1.057584000 | -0.085939000 | -1.411938000 |
| Zr | 2.472480000  | 0.002666000  | 0.146856000  |
| Zr | -0.084173000 | -1.620920000 | 2.036854000  |
| Zr | -0.041232000 | 1.957204000  | 1.751061000  |
| Zr | -0.013224000 | 1.651803000  | -1.799074000 |
| Zr | -2.536676000 | -0.002599000 | 0.047814000  |

|    |             |              |              |
|----|-------------|--------------|--------------|
| Zr | 0.037310000 | -1.953244000 | -1.573758000 |
| Fe | 0.849085000 | -0.317141000 | -4.702624000 |
| C  | 2.757373000 | -0.112092000 | -5.614885000 |
| C  | 3.107391000 | 1.250201000  | -6.147975000 |
| H  | 3.103857000 | -0.959223000 | -6.225230000 |
| H  | 1.189752000 | -0.249881000 | -6.309030000 |
| H  | 2.540914000 | 2.027551000  | -5.627819000 |
| H  | 4.171063000 | 1.438294000  | -5.958494000 |
| H  | 2.920346000 | 1.326365000  | -7.221868000 |
| O  | 2.798304000 | -0.288373000 | -4.307679000 |
| H  | 2.100436000 | -0.103831000 | -2.621748000 |

Fe-NU-1000 (Prod\_2)

Free Energy: -4212.61731

Electronic Energy: -4212.8448996

|   |              |              |              |
|---|--------------|--------------|--------------|
| C | 5.726500000  | -2.889200000 | -2.160200000 |
| C | -5.638900000 | -2.885100000 | -2.451400000 |
| C | 4.388900000  | -3.187693000 | -2.460009000 |
| C | -4.293002000 | -3.161888000 | -2.734613000 |
| C | 4.106400000  | -4.252600000 | -3.328500000 |
| C | -3.986000000 | -4.236300000 | -3.582700000 |
| C | 5.138200000  | -5.020700000 | -3.859400000 |
| C | -4.998200000 | -5.035200000 | -4.107600000 |
| C | 6.482800000  | -4.751200000 | -3.537700000 |
| C | -6.351100000 | -4.782200000 | -3.807100000 |
| C | 6.755800000  | -3.657500000 | -2.694900000 |
| C | -6.649700000 | -3.679700000 | -2.983400000 |
| C | 5.673400000  | 2.762000000  | -2.369400000 |
| C | -5.668800000 | 2.628900000  | -2.684600000 |
| C | 4.341401000  | 3.021283000  | -2.724819000 |
| C | -4.324802000 | 2.871983000  | -3.008017000 |
| C | 4.069900000  | 4.017800000  | -3.673300000 |
| C | -4.019400000 | 3.907100000  | -3.904900000 |
| C | 5.105900000  | 4.760700000  | -4.231200000 |
| C | -5.033000000 | 4.692700000  | -4.448900000 |
| C | 6.444700000  | 4.526400000  | -3.861700000 |
| C | -6.384200000 | 4.462600000  | -4.123400000 |
| C | 6.708200000  | 3.500400000  | -2.934600000 |
| C | -6.680500000 | 3.408600000  | -3.237600000 |
| C | -3.223387000 | -2.332355000 | -2.105720000 |
| C | -3.315199000 | -2.089508000 | 2.441202000  |
| C | -3.322906000 | 2.330109000  | 2.211508000  |
| C | 3.188504000  | 2.436995000  | 2.193714000  |
| C | 3.242002000  | 2.241971000  | -2.086037000 |
| C | 3.280308000  | -2.402410000 | -1.851706000 |
| C | -3.245494000 | 2.084873000  | -2.346633000 |
| C | 3.174610000  | -2.211103000 | 2.426611000  |
| H | 5.937000000  | -2.056700000 | -1.495800000 |
| H | -5.871700000 | -2.048200000 | -1.800500000 |
| H | 3.070800000  | -4.466900000 | -3.573300000 |
| H | -2.943100000 | -4.450000000 | -3.798200000 |
| H | 4.900900000  | -5.847200000 | -4.524400000 |
| H | -4.737200000 | -5.873100000 | -4.749000000 |
| H | 7.786000000  | -3.416500000 | -2.445100000 |
| H | -7.686200000 | -3.452500000 | -2.747200000 |
| H | 5.874800000  | 1.981600000  | -1.642500000 |



|   |             |             |             |
|---|-------------|-------------|-------------|
| H | -5.89900000 | 1.83020000  | -1.98630000 |
| H | 3.03890000  | 4.19850000  | -3.96280000 |
| H | -2.97830000 | 4.10040000  | -4.14500000 |
| H | 4.87690000  | 5.53410000  | -4.95980000 |
| H | -4.77430000 | 5.49830000  | -5.13120000 |
| H | 7.73460000  | 3.29050000  | -2.64450000 |
| H | -7.71490000 | 3.20560000  | -2.97220000 |
| H | -7.13990000 | -5.40920000 | -4.21020000 |
| H | 7.28610000  | -5.35680000 | -3.94480000 |
| H | -7.17290000 | 5.07750000  | -4.54480000 |
| H | 7.25200000  | 5.10910000  | -4.29360000 |
| H | -4.10109300 | -2.66662500 | 2.88188000  |
| H | 3.96484300  | 3.00475200  | 2.66258100  |
| H | -4.11185800 | 2.91444500  | 2.63692500  |
| H | 3.94837700  | -2.76839700 | 2.91197600  |
| O | -3.66372400 | 1.47208500  | 1.33740600  |
| O | -3.61002900 | 1.25540700  | -1.45669500 |
| O | -3.65396500 | -1.25860500 | 1.54290700  |
| O | -2.12728600 | -2.31017600 | 2.83573400  |
| O | 1.97027700  | -2.52177400 | 2.68363100  |
| O | 2.09006400  | -2.74279400 | -2.14054700 |
| O | 3.54814500  | -1.28612100 | 1.64077600  |
| O | 3.61416000  | -1.44840400 | -1.08373100 |
| O | 3.55714400  | 1.48568400  | 1.43845500  |
| O | 3.59175700  | 1.32024800  | -1.28533300 |
| O | 2.04628000  | 2.54787500  | -2.38638500 |
| O | 1.98646200  | 2.77120900  | 2.43567700  |
| O | -2.02000300 | -2.55469500 | -2.44466400 |
| O | -3.60398500 | -1.47471300 | -1.24837900 |
| O | -2.13433900 | 2.56235600  | 2.59228800  |
| O | -2.04499500 | 2.31715900  | -2.69440700 |
| H | -1.96588400 | -2.85040200 | 0.22089200  |
| H | -1.03738700 | 1.81538900  | 4.28906500  |
| H | -0.13803300 | 0.51379700  | 4.14213200  |
| H | -0.75776500 | 1.61014200  | -4.33293500 |
| H | -0.00469200 | 4.06531100  | -0.38451100 |
| H | 0.63752600  | 4.48446100  | 1.63491300  |
| H | 0.92408600  | 4.20217900  | -1.66103000 |
| H | 1.86081100  | 0.16550300  | 2.99805100  |
| H | -1.97199700 | 2.88436000  | -0.09018100 |
| H | -0.81202700 | -1.48995400 | 4.55625200  |
| H | -0.73787000 | -2.09149200 | -4.11844400 |
| H | 0.84263200  | -4.19382500 | 1.93513700  |
| H | 0.73178100  | -4.45422400 | -1.36406300 |
| H | -0.00275800 | -4.02156700 | 0.59955400  |
| O | -1.12148200 | 0.12129400  | 1.55086100  |
| O | -0.01615000 | -3.89458700 | 1.61043600  |
| O | 1.03715500  | 1.51733300  | 0.02564900  |
| O | 1.31466100  | 0.15648700  | 2.20485200  |
| O | -0.07415000 | -1.09200400 | 4.08258300  |
| O | -0.15897700 | 1.52335600  | 4.01347900  |
| O | 0.09480700  | -1.74437100 | -3.77585600 |
| O | 1.03800800  | -1.47090100 | 0.22956700  |
| O | -1.41953200 | -2.05716700 | 0.21376600  |
| O | -0.02039500 | -3.97532700 | -1.00071800 |
| O | -0.09157600 | 4.00265600  | 1.23035100  |

|    |              |              |              |
|----|--------------|--------------|--------------|
| O  | 0.037192000  | 3.931320000  | -1.390165000 |
| O  | -1.426412000 | 2.091039000  | -0.060189000 |
| O  | 0.085864000  | 1.346496000  | -3.944986000 |
| O  | 1.379617000  | -0.116306000 | -1.933307000 |
| O  | -1.067863000 | -0.084392000 | -1.402269000 |
| Zr | 2.452979000  | 0.001769000  | 0.156122000  |
| Zr | -0.089436000 | -1.622011000 | 2.036512000  |
| Zr | -0.043530000 | 1.958242000  | 1.745182000  |
| Zr | -0.027101000 | 1.645974000  | -1.816473000 |
| Zr | -2.541614000 | -0.001326000 | 0.049861000  |
| Zr | 0.022137000  | -1.941698000 | -1.583339000 |
| Fe | 0.855059000  | -0.289492000 | -4.902686000 |
| C  | 3.949054000  | 0.188975000  | -4.560961000 |
| C  | 4.291361000  | 0.811901000  | -5.856292000 |
| H  | 0.862725000  | -0.195276000 | -6.539314000 |
| H  | 4.740527000  | 0.085891000  | -3.797897000 |
| H  | 3.429929000  | 0.823927000  | -6.527100000 |
| H  | 4.643365000  | 1.837256000  | -5.680802000 |
| H  | 5.128004000  | 0.282180000  | -6.325345000 |
| O  | 2.814316000  | -0.215686000 | -4.266837000 |
| H  | 2.070282000  | -0.165397000 | -2.610596000 |

Fe-NU-1000 (Prod-deCH<sub>3</sub>CHO)

Free Energy: -4058.821544

Electronic Energy: -4058.9971256

|   |              |              |              |
|---|--------------|--------------|--------------|
| C | 5.726500000  | -2.889200000 | -2.160200000 |
| C | -5.638900000 | -2.885100000 | -2.451400000 |
| C | 4.388901000  | -3.187672000 | -2.460036000 |
| C | -4.293003000 | -3.161878000 | -2.734624000 |
| C | 4.106400000  | -4.252600000 | -3.328500000 |
| C | -3.986000000 | -4.236300000 | -3.582700000 |
| C | 5.138200000  | -5.020700000 | -3.859400000 |
| C | -4.998200000 | -5.035200000 | -4.107600000 |
| C | 6.482800000  | -4.751200000 | -3.537700000 |
| C | -6.351100000 | -4.782200000 | -3.807100000 |
| C | 6.755800000  | -3.657500000 | -2.694900000 |
| C | -6.649700000 | -3.679700000 | -2.983400000 |
| C | 5.673400000  | 2.762000000  | -2.369400000 |
| C | -5.668800000 | 2.628900000  | -2.684600000 |
| C | 4.341401000  | 3.021272000  | -2.724833000 |
| C | -4.324802000 | 2.871980000  | -3.008020000 |
| C | 4.069900000  | 4.017800000  | -3.673300000 |
| C | -4.019400000 | 3.907100000  | -3.904900000 |
| C | 5.105900000  | 4.760700000  | -4.231200000 |
| C | -5.033000000 | 4.692700000  | -4.448900000 |
| C | 6.444700000  | 4.526400000  | -3.861700000 |
| C | -6.384200000 | 4.462600000  | -4.123400000 |
| C | 6.708200000  | 3.500400000  | -2.934600000 |
| C | -6.680500000 | 3.408600000  | -3.237600000 |
| C | -3.223386000 | -2.332157000 | -2.105837000 |
| C | -3.315213000 | -2.089525000 | 2.441212000  |
| C | -3.322917000 | 2.330126000  | 2.211514000  |
| C | 3.188502000  | 2.437017000  | 2.193685000  |
| C | 3.241981000  | 2.241896000  | -2.086036000 |
| C | 3.280272000  | -2.402298000 | -1.851735000 |
| C | -3.245496000 | 2.084661000  | -2.346745000 |

|   |              |              |              |
|---|--------------|--------------|--------------|
| C | 3.174600000  | -2.211115000 | 2.426590000  |
| H | 5.937000000  | -2.056700000 | -1.495800000 |
| H | -5.871700000 | -2.048200000 | -1.800500000 |
| H | 3.070800000  | -4.466900000 | -3.573300000 |
| H | -2.943100000 | -4.450000000 | -3.798200000 |
| H | 4.900900000  | -5.847200000 | -4.524400000 |
| H | -4.737200000 | -5.873100000 | -4.749000000 |
| H | 7.786000000  | -3.416500000 | -2.445100000 |
| H | -7.686200000 | -3.452500000 | -2.747200000 |
| H | 5.874800000  | 1.981600000  | -1.642500000 |
| H | -5.899000000 | 1.830200000  | -1.986300000 |
| H | 3.038900000  | 4.198500000  | -3.962800000 |
| H | -2.978300000 | 4.100400000  | -4.145000000 |
| H | 4.876900000  | 5.534100000  | -4.959800000 |
| H | -4.774300000 | 5.498300000  | -5.131200000 |
| H | 7.734600000  | 3.290500000  | -2.644500000 |
| H | -7.714900000 | 3.205600000  | -2.972200000 |
| H | -7.139900000 | -5.409200000 | -4.210200000 |
| H | 7.286100000  | -5.356800000 | -3.944800000 |
| H | -7.172900000 | 5.077500000  | -4.544800000 |
| H | 7.252000000  | 5.109100000  | -4.293600000 |
| H | -4.101092000 | -2.666632000 | 2.881873000  |
| H | 3.964843000  | 3.004756000  | 2.662576000  |
| H | -4.111856000 | 2.914455000  | 2.636914000  |
| H | 3.948377000  | -2.768402000 | 2.911970000  |
| O | -3.663674000 | 1.472110000  | 1.337384000  |
| O | -3.610011000 | 1.255303000  | -1.456767000 |
| O | -3.653962000 | -1.258617000 | 1.542889000  |
| O | -2.127302000 | -2.310070000 | 2.835706000  |
| O | 1.970297000  | -2.521744000 | 2.683639000  |
| O | 2.089956000  | -2.743247000 | -2.140488000 |
| O | 3.548165000  | -1.286123000 | 1.640812000  |
| O | 3.614268000  | -1.448332000 | -1.083778000 |
| O | 3.557179000  | 1.485729000  | 1.438507000  |
| O | 3.591867000  | 1.320230000  | -1.285380000 |
| O | 2.046359000  | 2.548335000  | -2.386304000 |
| O | 1.986485000  | 2.771246000  | 2.435747000  |
| O | -2.020185000 | -2.554912000 | -2.444513000 |
| O | -3.604007000 | -1.474621000 | -1.248470000 |
| O | -2.134311000 | 2.562251000  | 2.592320000  |
| O | -2.045069000 | 2.317150000  | -2.694194000 |
| H | -1.964309000 | -2.849769000 | 0.222773000  |
| H | -1.031861000 | 1.819568000  | 4.286732000  |
| H | -0.139352000 | 0.512611000  | 4.136614000  |
| H | -0.794802000 | 1.597028000  | -4.360615000 |
| H | 0.001456000  | 4.078717000  | -0.379169000 |
| H | 0.636540000  | 4.485475000  | 1.636867000  |
| H | 0.916897000  | 4.228091000  | -1.668854000 |
| H | 1.858116000  | 0.164138000  | 3.001049000  |
| H | -1.969980000 | 2.883287000  | -0.089832000 |
| H | -0.811791000 | -1.493085000 | 4.546063000  |
| H | -0.783515000 | -2.101260000 | -4.121772000 |
| H | 0.836986000  | -4.202499000 | 1.954146000  |
| H | 0.698236000  | -4.491291000 | -1.373073000 |
| H | -0.000023000 | -4.036478000 | 0.611103000  |
| O | -1.116930000 | 0.120514000  | 1.543161000  |

|    |              |              |              |
|----|--------------|--------------|--------------|
| O  | -0.014032000 | -3.892881000 | 1.619096000  |
| O  | 1.041888000  | 1.499670000  | 0.014795000  |
| O  | 1.318544000  | 0.155041000  | 2.203124000  |
| O  | -0.075613000 | -1.092436000 | 4.071810000  |
| O  | -0.156948000 | 1.521767000  | 4.005827000  |
| O  | 0.081392000  | -1.865671000 | -3.768890000 |
| O  | 1.045693000  | -1.452687000 | 0.206021000  |
| O  | -1.413128000 | -2.059688000 | 0.208962000  |
| O  | -0.027454000 | -3.991656000 | -0.984107000 |
| O  | -0.084996000 | 3.998001000  | 1.225452000  |
| O  | 0.037386000  | 3.944338000  | -1.386081000 |
| O  | -1.420984000 | 2.091856000  | -0.064878000 |
| O  | 0.052761000  | 1.384706000  | -3.954911000 |
| O  | 1.404192000  | -0.110798000 | -2.080835000 |
| O  | -1.028837000 | -0.084852000 | -1.413032000 |
| Zr | 2.471940000  | 0.003369000  | 0.164651000  |
| Zr | -0.084865000 | -1.621808000 | 2.029333000  |
| Zr | -0.039923000 | 1.955909000  | 1.741699000  |
| Zr | -0.022551000 | 1.672515000  | -1.819093000 |
| Zr | -2.530996000 | -0.002984000 | 0.041097000  |
| Zr | 0.027256000  | -1.973674000 | -1.588864000 |
| Fe | 1.027224000  | -0.282772000 | -4.492822000 |
| H  | 2.338884000  | -0.292859000 | -5.444531000 |
| H  | 2.273665000  | -0.085547000 | -2.508182000 |

Fe-NU-1000 (TS3\_2)

Free Energy: -4058.797888

Electronic Energy: -4058.969866

|   |              |              |              |
|---|--------------|--------------|--------------|
| C | 5.726500000  | -2.889200000 | -2.160200000 |
| C | -5.638900000 | -2.885100000 | -2.451400000 |
| C | 4.388900000  | -3.187700000 | -2.460000000 |
| C | -4.293000000 | -3.161900000 | -2.734600000 |
| C | 4.106400000  | -4.252600000 | -3.328500000 |
| C | -3.986000000 | -4.236300000 | -3.582700000 |
| C | 5.138200000  | -5.020700000 | -3.859400000 |
| C | -4.998200000 | -5.035200000 | -4.107600000 |
| C | 6.482800000  | -4.751200000 | -3.537700000 |
| C | -6.351100000 | -4.782200000 | -3.807100000 |
| C | 6.755800000  | -3.657500000 | -2.694900000 |
| C | -6.649700000 | -3.679700000 | -2.983400000 |
| C | 5.673400000  | 2.762000000  | -2.369400000 |
| C | -5.668800000 | 2.628900000  | -2.684600000 |
| C | 4.341400000  | 3.021300000  | -2.724800000 |
| C | -4.324800000 | 2.872000000  | -3.008000000 |
| C | 4.069900000  | 4.017800000  | -3.673300000 |
| C | -4.019400000 | 3.907100000  | -3.904900000 |
| C | 5.105900000  | 4.760700000  | -4.231200000 |
| C | -5.033000000 | 4.692700000  | -4.448900000 |
| C | 6.444700000  | 4.526400000  | -3.861700000 |
| C | -6.384200000 | 4.462600000  | -4.123400000 |
| C | 6.708200000  | 3.500400000  | -2.934600000 |
| C | -6.680500000 | 3.408600000  | -3.237600000 |
| C | -3.223400000 | -2.332300000 | -2.105800000 |
| C | -3.315200000 | -2.089500000 | 2.441200000  |
| C | -3.322900000 | 2.330100000  | 2.211500000  |
| C | 3.188500000  | 2.437000000  | 2.193700000  |

|   |             |             |             |
|---|-------------|-------------|-------------|
| C | 3.24200000  | 2.24200000  | -2.08600000 |
| C | 3.28030000  | -2.40240000 | -1.85170000 |
| C | -3.24550000 | 2.08480000  | -2.34670000 |
| C | 3.17460000  | -2.21110000 | 2.42660000  |
| H | 5.93700000  | -2.05670000 | -1.49580000 |
| H | -5.87170000 | -2.04820000 | -1.80050000 |
| H | 3.07080000  | -4.46690000 | -3.57330000 |
| H | -2.94310000 | -4.45000000 | -3.79820000 |
| H | 4.90090000  | -5.84720000 | -4.52440000 |
| H | -4.73720000 | -5.87310000 | -4.74900000 |
| H | 7.78600000  | -3.41650000 | -2.44510000 |
| H | -7.68620000 | -3.45250000 | -2.74720000 |
| H | 5.87480000  | 1.98160000  | -1.64250000 |
| H | -5.89900000 | 1.83020000  | -1.98630000 |
| H | 3.03890000  | 4.19850000  | -3.96280000 |
| H | -2.97830000 | 4.10040000  | -4.14500000 |
| H | 4.87690000  | 5.53410000  | -4.95980000 |
| H | -4.77430000 | 5.49830000  | -5.13120000 |
| H | 7.73460000  | 3.29050000  | -2.64450000 |
| H | -7.71490000 | 3.20560000  | -2.97220000 |
| H | -7.13990000 | -5.40920000 | -4.21020000 |
| H | 7.28610000  | -5.35680000 | -3.94480000 |
| H | -7.17290000 | 5.07750000  | -4.54480000 |
| H | 7.25200000  | 5.10910000  | -4.29360000 |
| H | -4.10109400 | -2.66661800 | 2.88188700  |
| H | 3.96484300  | 3.00475000  | 2.66258300  |
| H | -4.11185900 | 2.91444000  | 2.63693000  |
| H | 3.94837700  | -2.76839700 | 2.91197600  |
| O | -3.66370000 | 1.47210000  | 1.33740000  |
| O | -3.61000000 | 1.25540000  | -1.45670000 |
| O | -3.65400000 | -1.25860000 | 1.54290000  |
| O | -2.12730000 | -2.31020000 | 2.83570000  |
| O | 1.97030000  | -2.52180000 | 2.68360000  |
| O | 2.09000000  | -2.74270000 | -2.14060000 |
| O | 3.54820000  | -1.28610000 | 1.64080000  |
| O | 3.61420000  | -1.44840000 | -1.08370000 |
| O | 3.55720000  | 1.48570000  | 1.43850000  |
| O | 3.59180000  | 1.32030000  | -1.28530000 |
| O | 2.04640000  | 2.54780000  | -2.38640000 |
| O | 1.98650000  | 2.77130000  | 2.43570000  |
| O | -2.02020000 | -2.55450000 | -2.44470000 |
| O | -3.60400000 | -1.47470000 | -1.24840000 |
| O | -2.13430000 | 2.56240000  | 2.59230000  |
| O | -2.04510000 | 2.31670000  | -2.69430000 |
| H | -1.95706100 | -2.85611900 | 0.22594800  |
| H | -1.03629100 | 1.81821600  | 4.29490200  |
| H | -0.13731200 | 0.51565700  | 4.14780700  |
| H | -0.75224500 | 1.65922000  | -4.40855100 |
| H | 0.00572400  | 4.07025600  | -0.38303000 |
| H | 0.63964400  | 4.48104500  | 1.63780800  |
| H | 0.93427900  | 4.19503400  | -1.66295600 |
| H | 1.87081600  | 0.16627100  | 2.98963900  |
| H | -1.96152600 | 2.87772800  | -0.10141700 |
| H | -0.81660700 | -1.48882600 | 4.55860500  |
| H | -0.81163500 | -2.14245400 | -4.09744400 |
| H | 0.84301800  | -4.19085200 | 1.96536500  |

|    |              |              |              |
|----|--------------|--------------|--------------|
| H  | 0.721826000  | -4.471065000 | -1.355960000 |
| H  | 0.003320000  | -4.035161000 | 0.624777000  |
| O  | -1.115330000 | 0.119062000  | 1.540754000  |
| O  | -0.013790000 | -3.893609000 | 1.632956000  |
| O  | 1.041563000  | 1.514750000  | 0.024574000  |
| O  | 1.315741000  | 0.156262000  | 2.202630000  |
| O  | -0.078690000 | -1.089666000 | 4.085868000  |
| O  | -0.159602000 | 1.524334000  | 4.015785000  |
| O  | 0.097728000  | -1.976927000 | -3.817837000 |
| O  | 1.046438000  | -1.467429000 | 0.224907000  |
| O  | -1.413815000 | -2.060586000 | 0.219169000  |
| O  | -0.016686000 | -3.985770000 | -0.973017000 |
| O  | -0.089386000 | 3.997996000  | 1.234310000  |
| O  | 0.046370000  | 3.930530000  | -1.386706000 |
| O  | -1.419252000 | 2.082368000  | -0.061083000 |
| O  | 0.099394000  | 1.458049000  | -4.005607000 |
| O  | 1.373109000  | -0.107427000 | -2.023907000 |
| O  | -1.081872000 | -0.097428000 | -1.438743000 |
| Zr | 2.470437000  | 0.005943000  | 0.128755000  |
| Zr | -0.082854000 | -1.619502000 | 2.044152000  |
| Zr | -0.039426000 | 1.957256000  | 1.751345000  |
| Zr | -0.009783000 | 1.644269000  | -1.798229000 |
| Zr | -2.539191000 | -0.002146000 | 0.044236000  |
| Zr | 0.034370000  | -1.955495000 | -1.548489000 |
| Fe | 0.961665000  | -0.301538000 | -4.146768000 |
| H  | 2.716006000  | -0.164557000 | -3.849901000 |
| H  | 2.288832000  | -0.129747000 | -2.905770000 |

Fe-NU-1000 (Prod-H<sub>2</sub>)

Free Energy: -4058.823065

Electronic Energy: -4058.9955589

|   |              |              |              |
|---|--------------|--------------|--------------|
| C | 5.726500000  | -2.889200000 | -2.160200000 |
| C | -5.638900000 | -2.885100000 | -2.451400000 |
| C | 4.388899000  | -3.187746000 | -2.459942000 |
| C | -4.292996000 | -3.161929000 | -2.734568000 |
| C | 4.106400000  | -4.252600000 | -3.328500000 |
| C | -3.986000000 | -4.236300000 | -3.582700000 |
| C | 5.138200000  | -5.020700000 | -3.859400000 |
| C | -4.998200000 | -5.035200000 | -4.107600000 |
| C | 6.482800000  | -4.751200000 | -3.537700000 |
| C | -6.351100000 | -4.782200000 | -3.807100000 |
| C | 6.755800000  | -3.657500000 | -2.694900000 |
| C | -6.649700000 | -3.679700000 | -2.983400000 |
| C | 5.673400000  | 2.762000000  | -2.369400000 |
| C | -5.668800000 | 2.628900000  | -2.684600000 |
| C | 4.341399000  | 3.021340000  | -2.724754000 |
| C | -4.324797000 | 2.872031000  | -3.007969000 |
| C | 4.069900000  | 4.017800000  | -3.673300000 |
| C | -4.019400000 | 3.907100000  | -3.904900000 |
| C | 5.105900000  | 4.760700000  | -4.231200000 |
| C | -5.033000000 | 4.692700000  | -4.448900000 |
| C | 6.444700000  | 4.526400000  | -3.861700000 |
| C | -6.384200000 | 4.462600000  | -4.123400000 |
| C | 6.708200000  | 3.500400000  | -2.934600000 |
| C | -6.680500000 | 3.408600000  | -3.237600000 |
| C | -3.223415000 | -2.332576000 | -2.105681000 |

|   |              |              |              |
|---|--------------|--------------|--------------|
| C | -3.315183000 | -2.089466000 | 2.441192000  |
| C | -3.322881000 | 2.330058000  | 2.211495000  |
| C | 3.188495000  | 2.436983000  | 2.193714000  |
| C | 3.242024000  | 2.242188000  | -2.085903000 |
| C | 3.280347000  | -2.402590000 | -1.851618000 |
| C | -3.245502000 | 2.085056000  | -2.346593000 |
| C | 3.174605000  | -2.211094000 | 2.426611000  |
| H | 5.937000000  | -2.056700000 | -1.495800000 |
| H | -5.871700000 | -2.048200000 | -1.800500000 |
| H | 3.070800000  | -4.466900000 | -3.573300000 |
| H | -2.943100000 | -4.450000000 | -3.798200000 |
| H | 4.900900000  | -5.847200000 | -4.524400000 |
| H | -4.737200000 | -5.873100000 | -4.749000000 |
| H | 7.786000000  | -3.416500000 | -2.445100000 |
| H | -7.686200000 | -3.452500000 | -2.747200000 |
| H | 5.874800000  | 1.981600000  | -1.642500000 |
| H | -5.899000000 | 1.830200000  | -1.986300000 |
| H | 3.038900000  | 4.198500000  | -3.962800000 |
| H | -2.978300000 | 4.100400000  | -4.145000000 |
| H | 4.876900000  | 5.534100000  | -4.959800000 |
| H | -4.774300000 | 5.498300000  | -5.131200000 |
| H | 7.734600000  | 3.290500000  | -2.644500000 |
| H | -7.714900000 | 3.205600000  | -2.972200000 |
| H | -7.139900000 | -5.409200000 | -4.210200000 |
| H | 7.286100000  | -5.356800000 | -3.944800000 |
| H | -7.172900000 | 5.077500000  | -4.544800000 |
| H | 7.252000000  | 5.109100000  | -4.293600000 |
| H | -4.101097000 | -2.666604000 | 2.881901000  |
| H | 3.964843000  | 3.004747000  | 2.662587000  |
| H | -4.111861000 | 2.914425000  | 2.636946000  |
| H | 3.948377000  | -2.768393000 | 2.911980000  |
| O | -3.663720000 | 1.472067000  | 1.337432000  |
| O | -3.610004000 | 1.255546000  | -1.456584000 |
| O | -3.654027000 | -1.258567000 | 1.542926000  |
| O | -2.127291000 | -2.310324000 | 2.835676000  |
| O | 1.970306000  | -2.521850000 | 2.683544000  |
| O | 2.089991000  | -2.742020000 | -2.140838000 |
| O | 3.548208000  | -1.286046000 | 1.640824000  |
| O | 3.614159000  | -1.448511000 | -1.083570000 |
| O | 3.557217000  | 1.485647000  | 1.438525000  |
| O | 3.591773000  | 1.320406000  | -1.285186000 |
| O | 2.046419000  | 2.547174000  | -2.386617000 |
| O | 1.986512000  | 2.771353000  | 2.435639000  |
| O | -2.020230000 | -2.553983000 | -2.445011000 |
| O | -3.604001000 | -1.474831000 | -1.248275000 |
| O | -2.134293000 | 2.562529000  | 2.592259000  |
| O | -2.045110000 | 2.316156000  | -2.694567000 |
| H | -1.958927000 | -2.857499000 | 0.231392000  |
| H | -1.040611000 | 1.812791000  | 4.311162000  |
| H | -0.137894000 | 0.512878000  | 4.159466000  |
| H | -0.680663000 | 1.422170000  | -4.414408000 |
| H | 0.006002000  | 4.068443000  | -0.374039000 |
| H | 0.643695000  | 4.476704000  | 1.649340000  |
| H | 0.938137000  | 4.186521000  | -1.649328000 |
| H | 1.878890000  | 0.167184000  | 2.986561000  |
| H | -1.961076000 | 2.884339000  | -0.095219000 |

|    |              |              |              |
|----|--------------|--------------|--------------|
| H  | -0.819730000 | -1.488912000 | 4.569486000  |
| H  | -0.707829000 | -1.944803000 | -4.165240000 |
| H  | 0.843648000  | -4.182613000 | 1.966303000  |
| H  | 0.739723000  | -4.448103000 | -1.340274000 |
| H  | 0.003617000  | -4.025155000 | 0.625630000  |
| O  | -1.117839000 | 0.120391000  | 1.546475000  |
| O  | -0.016570000 | -3.891759000 | 1.636902000  |
| O  | 1.039162000  | 1.529712000  | 0.039216000  |
| O  | 1.312134000  | 0.158105000  | 2.208083000  |
| O  | -0.081215000 | -1.089531000 | 4.097984000  |
| O  | -0.163624000 | 1.522605000  | 4.029855000  |
| O  | 0.174670000  | -1.874842000 | -3.782460000 |
| O  | 1.042038000  | -1.474715000 | 0.242215000  |
| O  | -1.421502000 | -2.058181000 | 0.229885000  |
| O  | -0.009683000 | -3.973425000 | -0.966119000 |
| O  | -0.093526000 | 4.000911000  | 1.252075000  |
| O  | 0.048350000  | 3.926857000  | -1.376016000 |
| O  | -1.425236000 | 2.085309000  | -0.046720000 |
| O  | 0.177841000  | 1.378128000  | -3.978229000 |
| O  | 1.337308000  | -0.106294000 | -1.968629000 |
| O  | -1.125446000 | -0.094118000 | -1.432451000 |
| Zr | 2.456112000  | 0.004895000  | 0.112818000  |
| Zr | -0.085121000 | -1.617875000 | 2.053786000  |
| Zr | -0.043877000 | 1.958690000  | 1.766324000  |
| Zr | -0.014222000 | 1.624549000  | -1.765109000 |
| Zr | -2.552989000 | -0.000927000 | 0.052637000  |
| Zr | 0.020184000  | -1.930652000 | -1.529549000 |
| Fe | 1.228130000  | -0.264933000 | -3.930167000 |
| H  | 2.725857000  | -0.301467000 | -4.928038000 |
| H  | 2.995156000  | -0.250350000 | -4.158051000 |

### Reaction on Fe-Hf-NU-1000

Fe-Hf-NU-1000-O

Free Energy: -4138.843903

Electronic Energy: -4138.9967777

|   |              |              |              |
|---|--------------|--------------|--------------|
| C | 5.726500000  | -2.889200000 | -2.160200000 |
| C | -5.638900000 | -2.885100000 | -2.451400000 |
| C | 4.388900000  | -3.187700000 | -2.460000000 |
| C | -4.293000000 | -3.161900000 | -2.734600000 |
| C | 4.106400000  | -4.252600000 | -3.328500000 |
| C | -3.986000000 | -4.236300000 | -3.582700000 |
| C | 5.138200000  | -5.020700000 | -3.859400000 |
| C | -4.998200000 | -5.035200000 | -4.107600000 |
| C | 6.482800000  | -4.751200000 | -3.537700000 |
| C | -6.351100000 | -4.782200000 | -3.807100000 |
| C | 6.755800000  | -3.657500000 | -2.694900000 |
| C | -6.649700000 | -3.679700000 | -2.983400000 |
| C | 5.673400000  | 2.762000000  | -2.369400000 |
| C | -5.668800000 | 2.628900000  | -2.684600000 |
| C | 4.341400000  | 3.021300000  | -2.724800000 |
| C | -4.324800000 | 2.872000000  | -3.008000000 |
| C | 4.069900000  | 4.017800000  | -3.673300000 |
| C | -4.019400000 | 3.907100000  | -3.904900000 |
| C | 5.105900000  | 4.760700000  | -4.231200000 |
| C | -5.033000000 | 4.692700000  | -4.448900000 |
| C | 6.444700000  | 4.526400000  | -3.861700000 |



|   |              |              |              |
|---|--------------|--------------|--------------|
| C | -6.384200000 | 4.462600000  | -4.123400000 |
| C | 6.708200000  | 3.500400000  | -2.934600000 |
| C | -6.680500000 | 3.408600000  | -3.237600000 |
| C | -3.223400000 | -2.332300000 | -2.105800000 |
| C | -3.315200000 | -2.089500000 | 2.441200000  |
| C | -3.322900000 | 2.330100000  | 2.211500000  |
| C | 3.188500000  | 2.437000000  | 2.193700000  |
| C | 3.242000000  | 2.242000000  | -2.086000000 |
| C | 3.280300000  | -2.402400000 | -1.851700000 |
| C | -3.245500000 | 2.084800000  | -2.346700000 |
| C | 3.174600000  | -2.211100000 | 2.426600000  |
| H | 5.937000000  | -2.056700000 | -1.495800000 |
| H | -5.871700000 | -2.048200000 | -1.800500000 |
| H | 3.070800000  | -4.466900000 | -3.573300000 |
| H | -2.943100000 | -4.450000000 | -3.798200000 |
| H | 4.900900000  | -5.847200000 | -4.524400000 |
| H | -4.737200000 | -5.873100000 | -4.749000000 |
| H | 7.786000000  | -3.416500000 | -2.445100000 |
| H | -7.686200000 | -3.452500000 | -2.747200000 |
| H | 5.874800000  | 1.981600000  | -1.642500000 |
| H | -5.899000000 | 1.830200000  | -1.986300000 |
| H | 3.038900000  | 4.198500000  | -3.962800000 |
| H | -2.978300000 | 4.100400000  | -4.145000000 |
| H | 4.876900000  | 5.534100000  | -4.959800000 |
| H | -4.774300000 | 5.498300000  | -5.131200000 |
| H | 7.734600000  | 3.290500000  | -2.644500000 |
| H | -7.714900000 | 3.205600000  | -2.972200000 |
| H | -7.139900000 | -5.409200000 | -4.210200000 |
| H | 7.286100000  | -5.356800000 | -3.944800000 |
| H | -7.172900000 | 5.077500000  | -4.544800000 |
| H | 7.252000000  | 5.109100000  | -4.293600000 |
| H | -4.101094000 | -2.666618000 | 2.881887000  |
| H | 3.964843000  | 3.004750000  | 2.662583000  |
| H | -4.111859000 | 2.914440000  | 2.636930000  |
| H | 3.948377000  | -2.768397000 | 2.911976000  |
| O | -3.663700000 | 1.472100000  | 1.337400000  |
| O | -3.610000000 | 1.255400000  | -1.456700000 |
| O | -3.654000000 | -1.258600000 | 1.542900000  |
| O | -2.127300000 | -2.310200000 | 2.835700000  |
| O | 1.970300000  | -2.521800000 | 2.683600000  |
| O | 2.090000000  | -2.742700000 | -2.140600000 |
| O | 3.548200000  | -1.286100000 | 1.640800000  |
| O | 3.614200000  | -1.448400000 | -1.083700000 |
| O | 3.557200000  | 1.485700000  | 1.438500000  |
| O | 3.591800000  | 1.320300000  | -1.285300000 |
| O | 2.046400000  | 2.547800000  | -2.386400000 |
| O | 1.986500000  | 2.771300000  | 2.435700000  |
| O | -2.020200000 | -2.554500000 | -2.444700000 |
| O | -3.604000000 | -1.474700000 | -1.248400000 |
| O | -2.134300000 | 2.562400000  | 2.592300000  |
| O | -2.045100000 | 2.316700000  | -2.694300000 |
| H | -1.964626000 | -2.853542000 | 0.223683000  |
| H | -1.012932000 | 1.831350000  | 4.298973000  |
| H | -0.129475000 | 0.515627000  | 4.135749000  |
| H | -0.482249000 | 1.443494000  | -4.603475000 |
| H | 0.000910000  | 4.067364000  | -0.377019000 |

|    |              |              |              |
|----|--------------|--------------|--------------|
| H  | 0.617075000  | 4.492774000  | 1.638663000  |
| H  | 0.919053000  | 4.203001000  | -1.668493000 |
| H  | 1.868234000  | 0.162495000  | 2.982124000  |
| H  | -1.964339000 | 2.889533000  | -0.087650000 |
| H  | -0.790330000 | -1.483671000 | 4.568229000  |
| H  | 0.174062000  | -2.374240000 | -4.477459000 |
| H  | 0.825233000  | -4.192941000 | 1.956138000  |
| H  | 0.752446000  | -4.438800000 | -1.329814000 |
| H  | -0.008764000 | -4.014423000 | 0.611165000  |
| O  | -1.122084000 | 0.121723000  | 1.539260000  |
| O  | -0.021455000 | -3.872381000 | 1.620443000  |
| O  | 1.036687000  | 1.499807000  | 0.013525000  |
| O  | 1.318988000  | 0.153791000  | 2.191116000  |
| O  | -0.071250000 | -1.080042000 | 4.072522000  |
| O  | -0.147903000 | 1.526628000  | 3.996849000  |
| O  | 0.172374000  | -1.719344000 | -3.773827000 |
| O  | 1.037700000  | -1.455385000 | 0.207838000  |
| O  | -1.422639000 | -2.057284000 | 0.220129000  |
| O  | -0.016372000 | -3.968586000 | -0.991599000 |
| O  | -0.090627000 | 3.987629000  | 1.226519000  |
| O  | 0.038562000  | 3.923555000  | -1.383976000 |
| O  | -1.427740000 | 2.090166000  | -0.054877000 |
| O  | 0.207886000  | 1.351973000  | -3.940241000 |
| O  | 1.351483000  | -0.103140000 | -2.061892000 |
| O  | -1.096534000 | -0.087598000 | -1.422870000 |
| Hf | 2.483701000  | 0.006959000  | 0.119580000  |
| Hf | -0.083535000 | -1.609050000 | 2.032202000  |
| Hf | -0.042725000 | 1.946953000  | 1.744584000  |
| Hf | -0.034712000 | 1.652881000  | -1.782574000 |
| Hf | -2.562309000 | -0.002679000 | 0.044997000  |
| Hf | 0.002538000  | -1.931689000 | -1.545570000 |
| Fe | 1.317226000  | -0.238173000 | -3.912398000 |
| O  | 2.011533000  | -0.407848000 | -5.371803000 |

Fe-Hf-NU-1000 (Ads\_3)

Free Energy: -4293.823934

Electronic Energy: -4294.05740768

|   |              |              |              |
|---|--------------|--------------|--------------|
| C | 5.726500000  | -2.889200000 | -2.160200000 |
| C | -5.638900000 | -2.885100000 | -2.451400000 |
| C | 4.388900000  | -3.187700000 | -2.460000000 |
| C | -4.293000000 | -3.161900000 | -2.734600000 |
| C | 4.106400000  | -4.252600000 | -3.328500000 |
| C | -3.986000000 | -4.236300000 | -3.582700000 |
| C | 5.138200000  | -5.020700000 | -3.859400000 |
| C | -4.998200000 | -5.035200000 | -4.107600000 |
| C | 6.482800000  | -4.751200000 | -3.537700000 |
| C | -6.351100000 | -4.782200000 | -3.807100000 |
| C | 6.755800000  | -3.657500000 | -2.694900000 |
| C | -6.649700000 | -3.679700000 | -2.983400000 |
| C | 5.673400000  | 2.762000000  | -2.369400000 |
| C | -5.668800000 | 2.628900000  | -2.684600000 |
| C | 4.341400000  | 3.021300000  | -2.724800000 |
| C | -4.324800000 | 2.872000000  | -3.008000000 |
| C | 4.069900000  | 4.017800000  | -3.673300000 |
| C | -4.019400000 | 3.907100000  | -3.904900000 |
| C | 5.105900000  | 4.760700000  | -4.231200000 |

|   |              |              |              |
|---|--------------|--------------|--------------|
| C | -5.033000000 | 4.692700000  | -4.448900000 |
| C | 6.444700000  | 4.526400000  | -3.861700000 |
| C | -6.384200000 | 4.462600000  | -4.123400000 |
| C | 6.708200000  | 3.500400000  | -2.934600000 |
| C | -6.680500000 | 3.408600000  | -3.237600000 |
| C | -3.223400000 | -2.332300000 | -2.105800000 |
| C | -3.315200000 | -2.089500000 | 2.441200000  |
| C | -3.322900000 | 2.330100000  | 2.211500000  |
| C | 3.188500000  | 2.437000000  | 2.193700000  |
| C | 3.242000000  | 2.242000000  | -2.086000000 |
| C | 3.280300000  | -2.402400000 | -1.851700000 |
| C | -3.245500000 | 2.084800000  | -2.346700000 |
| C | 3.174600000  | -2.211100000 | 2.426600000  |
| H | 5.937000000  | -2.056700000 | -1.495800000 |
| H | -5.871700000 | -2.048200000 | -1.800500000 |
| H | 3.070800000  | -4.466900000 | -3.573300000 |
| H | -2.943100000 | -4.450000000 | -3.798200000 |
| H | 4.900900000  | -5.847200000 | -4.524400000 |
| H | -4.737200000 | -5.873100000 | -4.749000000 |
| H | 7.786000000  | -3.416500000 | -2.445100000 |
| H | -7.686200000 | -3.452500000 | -2.747200000 |
| H | 5.874800000  | 1.981600000  | -1.642500000 |
| H | -5.899000000 | 1.830200000  | -1.986300000 |
| H | 3.038900000  | 4.198500000  | -3.962800000 |
| H | -2.978300000 | 4.100400000  | -4.145000000 |
| H | 4.876900000  | 5.534100000  | -4.959800000 |
| H | -4.774300000 | 5.498300000  | -5.131200000 |
| H | 7.734600000  | 3.290500000  | -2.644500000 |
| H | -7.714900000 | 3.205600000  | -2.972200000 |
| H | -7.139900000 | -5.409200000 | -4.210200000 |
| H | 7.286100000  | -5.356800000 | -3.944800000 |
| H | -7.172900000 | 5.077500000  | -4.544800000 |
| H | 7.252000000  | 5.109100000  | -4.293600000 |
| H | -4.101094000 | -2.666618000 | 2.881887000  |
| H | 3.964843000  | 3.004750000  | 2.662583000  |
| H | -4.111859000 | 2.914440000  | 2.636930000  |
| H | 3.948377000  | -2.768397000 | 2.911976000  |
| O | -3.663700000 | 1.472100000  | 1.337400000  |
| O | -3.610000000 | 1.255400000  | -1.456700000 |
| O | -3.654000000 | -1.258600000 | 1.542900000  |
| O | -2.127300000 | -2.310200000 | 2.835700000  |
| O | 1.970300000  | -2.521800000 | 2.683600000  |
| O | 2.090000000  | -2.742700000 | -2.140600000 |
| O | 3.548200000  | -1.286100000 | 1.640800000  |
| O | 3.614200000  | -1.448400000 | -1.083700000 |
| O | 3.557200000  | 1.485700000  | 1.438500000  |
| O | 3.591800000  | 1.320300000  | -1.285300000 |
| O | 2.046400000  | 2.547800000  | -2.386400000 |
| O | 1.986500000  | 2.771300000  | 2.435700000  |
| O | -2.020200000 | -2.554500000 | -2.444700000 |
| O | -3.604000000 | -1.474700000 | -1.248400000 |
| O | -2.134300000 | 2.562400000  | 2.592300000  |
| O | -2.045100000 | 2.316700000  | -2.694300000 |
| H | -1.955466000 | -2.857846000 | 0.227344000  |
| H | -1.020427000 | 1.824731000  | 4.282908000  |
| H | -0.130106000 | 0.513641000  | 4.127938000  |

|    |              |              |              |
|----|--------------|--------------|--------------|
| H  | -0.414775000 | 1.541774000  | -4.666936000 |
| H  | -0.003055000 | 4.048878000  | -0.399842000 |
| H  | 0.621331000  | 4.486186000  | 1.628460000  |
| H  | 0.925032000  | 4.168301000  | -1.677747000 |
| H  | 1.869045000  | 0.163088000  | 2.979285000  |
| H  | -1.956839000 | 2.882062000  | -0.095190000 |
| H  | -0.795806000 | -1.483885000 | 4.558557000  |
| H  | -0.516763000 | -2.095800000 | -4.369890000 |
| H  | 0.827854000  | -4.189804000 | 1.950983000  |
| H  | 0.727167000  | -4.442733000 | -1.347783000 |
| H  | 0.001478000  | -4.006691000 | 0.595948000  |
| O  | -1.123130000 | 0.120302000  | 1.542565000  |
| O  | -0.017589000 | -3.870048000 | 1.612246000  |
| O  | 1.040195000  | 1.491359000  | 0.005539000  |
| O  | 1.320346000  | 0.153411000  | 2.188143000  |
| O  | -0.070407000 | -1.083914000 | 4.069156000  |
| O  | -0.149782000 | 1.524988000  | 3.991808000  |
| O  | 0.180798000  | -1.873826000 | -3.745965000 |
| O  | 1.042312000  | -1.450573000 | 0.204690000  |
| O  | -1.424065000 | -2.054722000 | 0.223312000  |
| O  | -0.018233000 | -3.960127000 | -0.977696000 |
| O  | -0.090458000 | 3.983643000  | 1.220495000  |
| O  | 0.037287000  | 3.903367000  | -1.403040000 |
| O  | -1.425990000 | 2.079534000  | -0.053543000 |
| O  | 0.193512000  | 1.368699000  | -3.943163000 |
| O  | 1.286660000  | -0.113437000 | -2.136786000 |
| O  | -1.132045000 | -0.097540000 | -1.424584000 |
| Hf | 2.477231000  | 0.000695000  | 0.113224000  |
| Hf | -0.082420000 | -1.611110000 | 2.025725000  |
| Hf | -0.041716000 | 1.943576000  | 1.735794000  |
| Hf | -0.035200000 | 1.610201000  | -1.795466000 |
| Hf | -2.567282000 | -0.002670000 | 0.050682000  |
| Hf | 0.000918000  | -1.917341000 | -1.557791000 |
| Fe | 1.190053000  | -0.273521000 | -4.081133000 |
| O  | 1.115669000  | -0.334564000 | -5.718277000 |
| C  | 4.040184000  | 0.203568000  | -4.844511000 |
| C  | 5.485701000  | 0.052519000  | -4.459435000 |
| H  | 3.852462000  | 0.103087000  | -5.918531000 |
| H  | 3.642235000  | 1.176090000  | -4.535944000 |
| H  | 5.583568000  | 0.110824000  | -3.371521000 |
| H  | 5.894792000  | -0.906709000 | -4.793561000 |
| H  | 6.080401000  | 0.855678000  | -4.904690000 |
| O  | 3.236988000  | -0.773555000 | -4.128137000 |
| H  | 3.299150000  | -1.621131000 | -4.592346000 |

Fe-Hf-NU-1000 (TS1\_3)

Free Energy: -4293.807869

Electronic Energy: -4294.03598764

|   |              |              |              |
|---|--------------|--------------|--------------|
| C | 5.726500000  | -2.889200000 | -2.160200000 |
| C | -5.638900000 | -2.885100000 | -2.451400000 |
| C | 4.388900000  | -3.187700000 | -2.460000000 |
| C | -4.293000000 | -3.161900000 | -2.734600000 |
| C | 4.106400000  | -4.252600000 | -3.328500000 |
| C | -3.986000000 | -4.236300000 | -3.582700000 |
| C | 5.138200000  | -5.020700000 | -3.859400000 |
| C | -4.998200000 | -5.035200000 | -4.107600000 |

|   |              |              |              |
|---|--------------|--------------|--------------|
| C | 6.482800000  | -4.751200000 | -3.537700000 |
| C | -6.351100000 | -4.782200000 | -3.807100000 |
| C | 6.755800000  | -3.657500000 | -2.694900000 |
| C | -6.649700000 | -3.679700000 | -2.983400000 |
| C | 5.673400000  | 2.762000000  | -2.369400000 |
| C | -5.668800000 | 2.628900000  | -2.684600000 |
| C | 4.341400000  | 3.021300000  | -2.724800000 |
| C | -4.324800000 | 2.872000000  | -3.008000000 |
| C | 4.069900000  | 4.017800000  | -3.673300000 |
| C | -4.019400000 | 3.907100000  | -3.904900000 |
| C | 5.105900000  | 4.760700000  | -4.231200000 |
| C | -5.033000000 | 4.692700000  | -4.448900000 |
| C | 6.444700000  | 4.526400000  | -3.861700000 |
| C | -6.384200000 | 4.462600000  | -4.123400000 |
| C | 6.708200000  | 3.500400000  | -2.934600000 |
| C | -6.680500000 | 3.408600000  | -3.237600000 |
| C | -3.223400000 | -2.332300000 | -2.105800000 |
| C | -3.315200000 | -2.089500000 | 2.441200000  |
| C | -3.322900000 | 2.330100000  | 2.211500000  |
| C | 3.188500000  | 2.437000000  | 2.193700000  |
| C | 3.242000000  | 2.242000000  | -2.086000000 |
| C | 3.280300000  | -2.402400000 | -1.851700000 |
| C | -3.245500000 | 2.084800000  | -2.346700000 |
| C | 3.174600000  | -2.211100000 | 2.426600000  |
| H | 5.937000000  | -2.056700000 | -1.495800000 |
| H | -5.871700000 | -2.048200000 | -1.800500000 |
| H | 3.070800000  | -4.466900000 | -3.573300000 |
| H | -2.943100000 | -4.450000000 | -3.798200000 |
| H | 4.900900000  | -5.847200000 | -4.524400000 |
| H | -4.737200000 | -5.873100000 | -4.749000000 |
| H | 7.786000000  | -3.416500000 | -2.445100000 |
| H | -7.686200000 | -3.452500000 | -2.747200000 |
| H | 5.874800000  | 1.981600000  | -1.642500000 |
| H | -5.899000000 | 1.830200000  | -1.986300000 |
| H | 3.038900000  | 4.198500000  | -3.962800000 |
| H | -2.978300000 | 4.100400000  | -4.145000000 |
| H | 4.876900000  | 5.534100000  | -4.959800000 |
| H | -4.774300000 | 5.498300000  | -5.131200000 |
| H | 7.734600000  | 3.290500000  | -2.644500000 |
| H | -7.714900000 | 3.205600000  | -2.972200000 |
| H | -7.139900000 | -5.409200000 | -4.210200000 |
| H | 7.286100000  | -5.356800000 | -3.944800000 |
| H | -7.172900000 | 5.077500000  | -4.544800000 |
| H | 7.252000000  | 5.109100000  | -4.293600000 |
| H | -4.101094000 | -2.666618000 | 2.881887000  |
| H | 3.964843000  | 3.004750000  | 2.662583000  |
| H | -4.111859000 | 2.914440000  | 2.636930000  |
| H | 3.948377000  | -2.768397000 | 2.911976000  |
| O | -3.663700000 | 1.472100000  | 1.337400000  |
| O | -3.610000000 | 1.255400000  | -1.456700000 |
| O | -3.654000000 | -1.258600000 | 1.542900000  |
| O | -2.127300000 | -2.310200000 | 2.835700000  |
| O | 1.970300000  | -2.521800000 | 2.683600000  |
| O | 2.090000000  | -2.742700000 | -2.140600000 |
| O | 3.548200000  | -1.286100000 | 1.640800000  |
| O | 3.614200000  | -1.448400000 | -1.083700000 |

|    |              |              |              |
|----|--------------|--------------|--------------|
| O  | 3.557200000  | 1.485700000  | 1.438500000  |
| O  | 3.591800000  | 1.320300000  | -1.285300000 |
| O  | 2.046400000  | 2.547800000  | -2.386400000 |
| O  | 1.986500000  | 2.771300000  | 2.435700000  |
| O  | -2.020200000 | -2.554500000 | -2.444700000 |
| O  | -3.604000000 | -1.474700000 | -1.248400000 |
| O  | -2.134300000 | 2.562400000  | 2.592300000  |
| O  | -2.045100000 | 2.316700000  | -2.694300000 |
| H  | -1.953359000 | -2.853152000 | 0.222507000  |
| H  | -1.013498000 | 1.829993000  | 4.280593000  |
| H  | -0.131921000 | 0.512473000  | 4.121413000  |
| H  | -0.579759000 | 1.568253000  | -4.580835000 |
| H  | 0.008309000  | 4.067742000  | -0.388485000 |
| H  | 0.621541000  | 4.488782000  | 1.636221000  |
| H  | 0.925345000  | 4.193480000  | -1.681078000 |
| H  | 1.860788000  | 0.160997000  | 2.988277000  |
| H  | -1.956016000 | 2.890090000  | -0.086973000 |
| H  | -0.794442000 | -1.486658000 | 4.545692000  |
| H  | -0.487629000 | -2.045311000 | -4.419113000 |
| H  | 0.826028000  | -4.195290000 | 1.946927000  |
| H  | 0.714014000  | -4.454210000 | -1.361405000 |
| H  | 0.001541000  | -4.009922000 | 0.590671000  |
| O  | -1.121287000 | 0.122310000  | 1.538078000  |
| O  | -0.013922000 | -3.865729000 | 1.604188000  |
| O  | 1.045887000  | 1.475469000  | -0.001805000 |
| O  | 1.325018000  | 0.152711000  | 2.188061000  |
| O  | -0.069820000 | -1.084313000 | 4.056899000  |
| O  | -0.146664000 | 1.523822000  | 3.984536000  |
| O  | 0.172084000  | -1.817036000 | -3.756977000 |
| O  | 1.046266000  | -1.428059000 | 0.179999000  |
| O  | -1.417721000 | -2.052635000 | 0.214386000  |
| O  | -0.023007000 | -3.962060000 | -0.986560000 |
| O  | -0.082392000 | 3.982451000  | 1.219339000  |
| O  | 0.042511000  | 3.923344000  | -1.393695000 |
| O  | -1.421899000 | 2.088932000  | -0.057454000 |
| O  | 0.121365000  | 1.438206000  | -3.935637000 |
| O  | 1.320962000  | -0.103848000 | -2.225874000 |
| O  | -1.093797000 | -0.087430000 | -1.423486000 |
| Hf | 2.503972000  | 0.010335000  | 0.130915000  |
| Hf | -0.079112000 | -1.608275000 | 2.014580000  |
| Hf | -0.038577000 | 1.941785000  | 1.731404000  |
| Hf | -0.031647000 | 1.651742000  | -1.799021000 |
| Hf | -2.558674000 | -0.001491000 | 0.042855000  |
| Hf | 0.004918000  | -1.928500000 | -1.571891000 |
| Fe | 1.154296000  | -0.207593000 | -4.079435000 |
| O  | 1.018811000  | -0.297658000 | -5.794048000 |
| C  | 4.026200000  | -0.664415000 | -4.828816000 |
| C  | 5.209875000  | -0.188437000 | -4.030017000 |
| H  | 3.651206000  | -1.626470000 | -4.444625000 |
| H  | 4.307240000  | -0.841887000 | -5.876673000 |
| H  | 5.574291000  | 0.765183000  | -4.422790000 |
| H  | 4.936967000  | -0.046515000 | -2.979211000 |
| H  | 6.021820000  | -0.920186000 | -4.082942000 |
| O  | 2.985495000  | 0.315583000  | -4.810059000 |
| H  | 2.170804000  | 0.090562000  | -5.697526000 |

Fe-Hf-NU-1000 (Int\_3)

Free Energy: -4293.841505

Electronic Energy: -4294.07253596

|   |              |              |              |
|---|--------------|--------------|--------------|
| C | 5.726500000  | -2.889200000 | -2.160200000 |
| C | -5.638900000 | -2.885100000 | -2.451400000 |
| C | 4.388900000  | -3.187700000 | -2.460000000 |
| C | -4.293000000 | -3.161900000 | -2.734600000 |
| C | 4.106400000  | -4.252600000 | -3.328500000 |
| C | -3.986000000 | -4.236300000 | -3.582700000 |
| C | 5.138200000  | -5.020700000 | -3.859400000 |
| C | -4.998200000 | -5.035200000 | -4.107600000 |
| C | 6.482800000  | -4.751200000 | -3.537700000 |
| C | -6.351100000 | -4.782200000 | -3.807100000 |
| C | 6.755800000  | -3.657500000 | -2.694900000 |
| C | -6.649700000 | -3.679700000 | -2.983400000 |
| C | 5.673400000  | 2.762000000  | -2.369400000 |
| C | -5.668800000 | 2.628900000  | -2.684600000 |
| C | 4.341400000  | 3.021300000  | -2.724800000 |
| C | -4.324800000 | 2.872000000  | -3.008000000 |
| C | 4.069900000  | 4.017800000  | -3.673300000 |
| C | -4.019400000 | 3.907100000  | -3.904900000 |
| C | 5.105900000  | 4.760700000  | -4.231200000 |
| C | -5.033000000 | 4.692700000  | -4.448900000 |
| C | 6.444700000  | 4.526400000  | -3.861700000 |
| C | -6.384200000 | 4.462600000  | -4.123400000 |
| C | 6.708200000  | 3.500400000  | -2.934600000 |
| C | -6.680500000 | 3.408600000  | -3.237600000 |
| C | -3.223400000 | -2.332300000 | -2.105800000 |
| C | -3.315200000 | -2.089500000 | 2.441200000  |
| C | -3.322900000 | 2.330100000  | 2.211500000  |
| C | 3.188500000  | 2.437000000  | 2.193700000  |
| C | 3.242000000  | 2.242000000  | -2.086000000 |
| C | 3.280300000  | -2.402400000 | -1.851700000 |
| C | -3.245500000 | 2.084800000  | -2.346700000 |
| C | 3.174600000  | -2.211100000 | 2.426600000  |
| H | 5.937000000  | -2.056700000 | -1.495800000 |
| H | -5.871700000 | -2.048200000 | -1.800500000 |
| H | 3.070800000  | -4.466900000 | -3.573300000 |
| H | -2.943100000 | -4.450000000 | -3.798200000 |
| H | 4.900900000  | -5.847200000 | -4.524400000 |
| H | -4.737200000 | -5.873100000 | -4.749000000 |
| H | 7.786000000  | -3.416500000 | -2.445100000 |
| H | -7.686200000 | -3.452500000 | -2.747200000 |
| H | 5.874800000  | 1.981600000  | -1.642500000 |
| H | -5.899000000 | 1.830200000  | -1.986300000 |
| H | 3.038900000  | 4.198500000  | -3.962800000 |
| H | -2.978300000 | 4.100400000  | -4.145000000 |
| H | 4.876900000  | 5.534100000  | -4.959800000 |
| H | -4.774300000 | 5.498300000  | -5.131200000 |
| H | 7.734600000  | 3.290500000  | -2.644500000 |
| H | -7.714900000 | 3.205600000  | -2.972200000 |
| H | -7.139900000 | -5.409200000 | -4.210200000 |
| H | 7.286100000  | -5.356800000 | -3.944800000 |
| H | -7.172900000 | 5.077500000  | -4.544800000 |
| H | 7.252000000  | 5.109100000  | -4.293600000 |

|    |              |              |              |
|----|--------------|--------------|--------------|
| H  | -4.101094000 | -2.666618000 | 2.881887000  |
| H  | 3.964843000  | 3.004750000  | 2.662583000  |
| H  | -4.111859000 | 2.914440000  | 2.636930000  |
| H  | 3.948377000  | -2.768397000 | 2.911976000  |
| O  | -3.663700000 | 1.472100000  | 1.337400000  |
| O  | -3.610000000 | 1.255400000  | -1.456700000 |
| O  | -3.654000000 | -1.258600000 | 1.542900000  |
| O  | -2.127300000 | -2.310200000 | 2.835700000  |
| O  | 1.970300000  | -2.521800000 | 2.683600000  |
| O  | 2.090000000  | -2.742700000 | -2.140600000 |
| O  | 3.548200000  | -1.286100000 | 1.640800000  |
| O  | 3.614200000  | -1.448400000 | -1.083700000 |
| O  | 3.557200000  | 1.485700000  | 1.438500000  |
| O  | 3.591800000  | 1.320300000  | -1.285300000 |
| O  | 2.046400000  | 2.547800000  | -2.386400000 |
| O  | 1.986500000  | 2.771300000  | 2.435700000  |
| O  | -2.020200000 | -2.554500000 | -2.444700000 |
| O  | -3.604000000 | -1.474700000 | -1.248400000 |
| O  | -2.134300000 | 2.562400000  | 2.592300000  |
| O  | -2.045100000 | 2.316700000  | -2.694300000 |
| H  | -1.967548000 | -2.848487000 | 0.226611000  |
| H  | -1.016454000 | 1.833379000  | 4.282593000  |
| H  | -0.129490000 | 0.520344000  | 4.128145000  |
| H  | -0.574657000 | 1.208416000  | -4.457402000 |
| H  | 0.004190000  | 4.065300000  | -0.388262000 |
| H  | 0.621695000  | 4.491975000  | 1.633976000  |
| H  | 0.924994000  | 4.193778000  | -1.677269000 |
| H  | 1.864966000  | 0.166485000  | 2.983075000  |
| H  | -1.961186000 | 2.892608000  | -0.085380000 |
| H  | -0.792917000 | -1.481162000 | 4.559190000  |
| H  | 0.270791000  | -2.403950000 | -4.318862000 |
| H  | 0.828579000  | -4.188949000 | 1.941023000  |
| H  | 0.760427000  | -4.422602000 | -1.332383000 |
| H  | -0.009146000 | -4.006549000 | 0.597537000  |
| O  | -1.123120000 | 0.123693000  | 1.540805000  |
| O  | -0.019158000 | -3.868513000 | 1.608204000  |
| O  | 1.039897000  | 1.490689000  | 0.003010000  |
| O  | 1.321131000  | 0.155663000  | 2.188458000  |
| O  | -0.069671000 | -1.079476000 | 4.067942000  |
| O  | -0.147562000 | 1.530651000  | 3.989242000  |
| O  | 0.147628000  | -1.648998000 | -3.735328000 |
| O  | 1.041092000  | -1.445668000 | 0.201581000  |
| O  | -1.425457000 | -2.052547000 | 0.221691000  |
| O  | -0.018576000 | -3.962724000 | -1.003788000 |
| O  | -0.086175000 | 3.988105000  | 1.220730000  |
| O  | 0.041071000  | 3.922863000  | -1.394140000 |
| O  | -1.426172000 | 2.092132000  | -0.057179000 |
| O  | 0.219571000  | 1.318360000  | -3.924224000 |
| O  | 1.352377000  | -0.111299000 | -2.071410000 |
| O  | -1.099147000 | -0.080950000 | -1.420708000 |
| Hf | 2.493803000  | 0.012735000  | 0.118481000  |
| Hf | -0.081604000 | -1.605336000 | 2.026205000  |
| Hf | -0.040316000 | 1.946430000  | 1.732687000  |
| Hf | -0.028458000 | 1.653068000  | -1.804709000 |
| Hf | -2.560913000 | 0.001423000  | 0.045352000  |
| Hf | -0.005666000 | -1.917328000 | -1.549580000 |



|    |             |              |              |
|----|-------------|--------------|--------------|
| Fe | 1.517642000 | -0.249541000 | -3.901942000 |
| O  | 1.526469000 | -0.574278000 | -5.687322000 |
| C  | 4.153951000 | -0.440333000 | -4.880157000 |
| C  | 5.528501000 | 0.154826000  | -4.660809000 |
| H  | 4.181813000 | -1.532982000 | -4.731396000 |
| H  | 3.798006000 | -0.264018000 | -5.905022000 |
| H  | 5.533981000 | 1.224930000  | -4.884664000 |
| H  | 5.839506000 | 0.025598000  | -3.619932000 |
| H  | 6.257018000 | -0.343134000 | -5.308079000 |
| O  | 3.264076000 | 0.146092000  | -3.959828000 |
| H  | 0.632375000 | -0.823641000 | -5.957014000 |

Fe-Hf-NU-1000 (TS2\_3)

Free Energy: -4293.82665

Electronic Energy: -4294.05058362

|   |              |              |              |
|---|--------------|--------------|--------------|
| C | 5.726500000  | -2.889200000 | -2.160200000 |
| C | -5.638900000 | -2.885100000 | -2.451400000 |
| C | 4.388900000  | -3.187700000 | -2.460000000 |
| C | -4.293000000 | -3.161900000 | -2.734600000 |
| C | 4.106400000  | -4.252600000 | -3.328500000 |
| C | -3.986000000 | -4.236300000 | -3.582700000 |
| C | 5.138200000  | -5.020700000 | -3.859400000 |
| C | -4.998200000 | -5.035200000 | -4.107600000 |
| C | 6.482800000  | -4.751200000 | -3.537700000 |
| C | -6.351100000 | -4.782200000 | -3.807100000 |
| C | 6.755800000  | -3.657500000 | -2.694900000 |
| C | -6.649700000 | -3.679700000 | -2.983400000 |
| C | 5.673400000  | 2.762000000  | -2.369400000 |
| C | -5.668800000 | 2.628900000  | -2.684600000 |
| C | 4.341400000  | 3.021300000  | -2.724800000 |
| C | -4.324800000 | 2.872000000  | -3.008000000 |
| C | 4.069900000  | 4.017800000  | -3.673300000 |
| C | -4.019400000 | 3.907100000  | -3.904900000 |
| C | 5.105900000  | 4.760700000  | -4.231200000 |
| C | -5.033000000 | 4.692700000  | -4.448900000 |
| C | 6.444700000  | 4.526400000  | -3.861700000 |
| C | -6.384200000 | 4.462600000  | -4.123400000 |
| C | 6.708200000  | 3.500400000  | -2.934600000 |
| C | -6.680500000 | 3.408600000  | -3.237600000 |
| C | -3.223400000 | -2.332300000 | -2.105800000 |
| C | -3.315200000 | -2.089500000 | 2.441200000  |
| C | -3.322900000 | 2.330100000  | 2.211500000  |
| C | 3.188500000  | 2.437000000  | 2.193700000  |
| C | 3.242000000  | 2.242000000  | -2.086000000 |
| C | 3.280300000  | -2.402400000 | -1.851700000 |
| C | -3.245500000 | 2.084800000  | -2.346700000 |
| C | 3.174600000  | -2.211100000 | 2.426600000  |
| H | 5.937000000  | -2.056700000 | -1.495800000 |
| H | -5.871700000 | -2.048200000 | -1.800500000 |
| H | 3.070800000  | -4.466900000 | -3.573300000 |
| H | -2.943100000 | -4.450000000 | -3.798200000 |
| H | 4.900900000  | -5.847200000 | -4.524400000 |
| H | -4.737200000 | -5.873100000 | -4.749000000 |
| H | 7.786000000  | -3.416500000 | -2.445100000 |
| H | -7.686200000 | -3.452500000 | -2.747200000 |
| H | 5.874800000  | 1.981600000  | -1.642500000 |

|   |              |              |              |
|---|--------------|--------------|--------------|
| H | -5.899000000 | 1.830200000  | -1.986300000 |
| H | 3.038900000  | 4.198500000  | -3.962800000 |
| H | -2.978300000 | 4.100400000  | -4.145000000 |
| H | 4.876900000  | 5.534100000  | -4.959800000 |
| H | -4.774300000 | 5.498300000  | -5.131200000 |
| H | 7.734600000  | 3.290500000  | -2.644500000 |
| H | -7.714900000 | 3.205600000  | -2.972200000 |
| H | -7.139900000 | -5.409200000 | -4.210200000 |
| H | 7.286100000  | -5.356800000 | -3.944800000 |
| H | -7.172900000 | 5.077500000  | -4.544800000 |
| H | 7.252000000  | 5.109100000  | -4.293600000 |
| H | -4.101094000 | -2.666618000 | 2.881887000  |
| H | 3.964843000  | 3.004750000  | 2.662583000  |
| H | -4.111859000 | 2.914440000  | 2.636930000  |
| H | 3.948377000  | -2.768397000 | 2.911976000  |
| O | -3.663700000 | 1.472100000  | 1.337400000  |
| O | -3.610000000 | 1.255400000  | -1.456700000 |
| O | -3.654000000 | -1.258600000 | 1.542900000  |
| O | -2.127300000 | -2.310200000 | 2.835700000  |
| O | 1.970300000  | -2.521800000 | 2.683600000  |
| O | 2.090000000  | -2.742700000 | -2.140600000 |
| O | 3.548200000  | -1.286100000 | 1.640800000  |
| O | 3.614200000  | -1.448400000 | -1.083700000 |
| O | 3.557200000  | 1.485700000  | 1.438500000  |
| O | 3.591800000  | 1.320300000  | -1.285300000 |
| O | 2.046400000  | 2.547800000  | -2.386400000 |
| O | 1.986500000  | 2.771300000  | 2.435700000  |
| O | -2.020200000 | -2.554500000 | -2.444700000 |
| O | -3.604000000 | -1.474700000 | -1.248400000 |
| O | -2.134300000 | 2.562400000  | 2.592300000  |
| O | -2.045100000 | 2.316700000  | -2.694300000 |
| H | -1.958452000 | -2.854710000 | 0.225631000  |
| H | -1.023316000 | 1.818512000  | 4.297890000  |
| H | -0.130937000 | 0.508720000  | 4.138935000  |
| H | -0.696499000 | 1.245269000  | -4.349680000 |
| H | -0.002594000 | 4.062455000  | -0.368044000 |
| H | 0.618956000  | 4.489474000  | 1.646239000  |
| H | 0.923302000  | 4.195792000  | -1.650744000 |
| H | 1.871657000  | 0.157669000  | 2.985250000  |
| H | -1.966245000 | 2.884684000  | -0.083223000 |
| H | -0.796030000 | -1.488616000 | 4.566107000  |
| H | -0.595803000 | -1.814720000 | -4.270005000 |
| H | 0.830528000  | -4.188449000 | 1.954871000  |
| H | 0.714052000  | -4.456196000 | -1.350131000 |
| H | -0.004295000 | -4.012759000 | 0.608113000  |
| O | -1.121354000 | 0.121415000  | 1.546300000  |
| O | -0.019417000 | -3.874451000 | 1.621310000  |
| O | 1.043936000  | 1.513263000  | 0.030012000  |
| O | 1.318602000  | 0.151930000  | 2.197122000  |
| O | -0.071854000 | -1.086221000 | 4.076913000  |
| O | -0.152691000 | 1.520872000  | 4.005004000  |
| O | 0.220358000  | -1.765059000 | -3.762178000 |
| O | 1.039176000  | -1.460766000 | 0.216276000  |
| O | -1.422336000 | -2.054674000 | 0.220581000  |
| O | -0.026111000 | -3.966520000 | -0.978023000 |
| O | -0.096250000 | 3.990514000  | 1.239605000  |

|    |              |              |              |
|----|--------------|--------------|--------------|
| O  | 0.039019000  | 3.921365000  | -1.374679000 |
| O  | -1.429595000 | 2.085752000  | -0.048600000 |
| O  | 0.152702000  | 1.315570000  | -3.901059000 |
| O  | 1.369256000  | -0.092933000 | -2.007807000 |
| O  | -1.103088000 | -0.092836000 | -1.422959000 |
| Hf | 2.477519000  | 0.002311000  | 0.113286000  |
| Hf | -0.080789000 | -1.612362000 | 2.032374000  |
| Hf | -0.040242000 | 1.946411000  | 1.751403000  |
| Hf | -0.026530000 | 1.638943000  | -1.768963000 |
| Hf | -2.554898000 | -0.003685000 | 0.050589000  |
| Hf | 0.016695000  | -1.931776000 | -1.553941000 |
| Fe | 1.477354000  | -0.256400000 | -3.884775000 |
| O  | 1.826552000  | 0.251252000  | -5.756779000 |
| C  | 4.095655000  | -0.481576000 | -5.066893000 |
| C  | 4.681145000  | -1.650064000 | -5.813559000 |
| H  | 3.175060000  | 0.041015000  | -5.776740000 |
| H  | 4.777006000  | 0.374852000  | -4.906318000 |
| H  | 5.405028000  | -2.176802000 | -5.178803000 |
| H  | 3.901527000  | -2.368083000 | -6.083674000 |
| H  | 5.192799000  | -1.321932000 | -6.722175000 |
| O  | 3.343140000  | -0.771386000 | -4.010881000 |
| H  | 1.559654000  | 1.155982000  | -5.971038000 |

Fe-Hf-NU-1000 (Prod\_3)

Free Energy: -4293.86248

Electronic Energy: -4294.0909427

|   |              |              |              |
|---|--------------|--------------|--------------|
| C | 5.726500000  | -2.889200000 | -2.160200000 |
| C | -5.638900000 | -2.885100000 | -2.451400000 |
| C | 4.388900000  | -3.187700000 | -2.460000000 |
| C | -4.293000000 | -3.161900000 | -2.734600000 |
| C | 4.106400000  | -4.252600000 | -3.328500000 |
| C | -3.986000000 | -4.236300000 | -3.582700000 |
| C | 5.138200000  | -5.020700000 | -3.859400000 |
| C | -4.998200000 | -5.035200000 | -4.107600000 |
| C | 6.482800000  | -4.751200000 | -3.537700000 |
| C | -6.351100000 | -4.782200000 | -3.807100000 |
| C | 6.755800000  | -3.657500000 | -2.694900000 |
| C | -6.649700000 | -3.679700000 | -2.983400000 |
| C | 5.673400000  | 2.762000000  | -2.369400000 |
| C | -5.668800000 | 2.628900000  | -2.684600000 |
| C | 4.341400000  | 3.021300000  | -2.724800000 |
| C | -4.324800000 | 2.872000000  | -3.008000000 |
| C | 4.069900000  | 4.017800000  | -3.673300000 |
| C | -4.019400000 | 3.907100000  | -3.904900000 |
| C | 5.105900000  | 4.760700000  | -4.231200000 |
| C | -5.033000000 | 4.692700000  | -4.448900000 |
| C | 6.444700000  | 4.526400000  | -3.861700000 |
| C | -6.384200000 | 4.462600000  | -4.123400000 |
| C | 6.708200000  | 3.500400000  | -2.934600000 |
| C | -6.680500000 | 3.408600000  | -3.237600000 |
| C | -3.223400000 | -2.332300000 | -2.105800000 |
| C | -3.315200000 | -2.089500000 | 2.441200000  |
| C | -3.322900000 | 2.330100000  | 2.211500000  |
| C | 3.188500000  | 2.437000000  | 2.193700000  |
| C | 3.242000000  | 2.242000000  | -2.086000000 |
| C | 3.280300000  | -2.402400000 | -1.851700000 |

|   |              |              |              |
|---|--------------|--------------|--------------|
| C | -3.245500000 | 2.084800000  | -2.346700000 |
| C | 3.174600000  | -2.211100000 | 2.426600000  |
| H | 5.937000000  | -2.056700000 | -1.495800000 |
| H | -5.871700000 | -2.048200000 | -1.800500000 |
| H | 3.070800000  | -4.466900000 | -3.573300000 |
| H | -2.943100000 | -4.450000000 | -3.798200000 |
| H | 4.900900000  | -5.847200000 | -4.524400000 |
| H | -4.737200000 | -5.873100000 | -4.749000000 |
| H | 7.786000000  | -3.416500000 | -2.445100000 |
| H | -7.686200000 | -3.452500000 | -2.747200000 |
| H | 5.874800000  | 1.981600000  | -1.642500000 |
| H | -5.899000000 | 1.830200000  | -1.986300000 |
| H | 3.038900000  | 4.198500000  | -3.962800000 |
| H | -2.978300000 | 4.100400000  | -4.145000000 |
| H | 4.876900000  | 5.534100000  | -4.959800000 |
| H | -4.774300000 | 5.498300000  | -5.131200000 |
| H | 7.734600000  | 3.290500000  | -2.644500000 |
| H | -7.714900000 | 3.205600000  | -2.972200000 |
| H | -7.139900000 | -5.409200000 | -4.210200000 |
| H | 7.286100000  | -5.356800000 | -3.944800000 |
| H | -7.172900000 | 5.077500000  | -4.544800000 |
| H | 7.252000000  | 5.109100000  | -4.293600000 |
| H | -4.101094000 | -2.666618000 | 2.881887000  |
| H | 3.964843000  | 3.004750000  | 2.662583000  |
| H | -4.111859000 | 2.914440000  | 2.636930000  |
| H | 3.948377000  | -2.768397000 | 2.911976000  |
| O | -3.663700000 | 1.472100000  | 1.337400000  |
| O | -3.610000000 | 1.255400000  | -1.456700000 |
| O | -3.654000000 | -1.258600000 | 1.542900000  |
| O | -2.127300000 | -2.310200000 | 2.835700000  |
| O | 1.970300000  | -2.521800000 | 2.683600000  |
| O | 2.090000000  | -2.742700000 | -2.140600000 |
| O | 3.548200000  | -1.286100000 | 1.640800000  |
| O | 3.614200000  | -1.448400000 | -1.083700000 |
| O | 3.557200000  | 1.485700000  | 1.438500000  |
| O | 3.591800000  | 1.320300000  | -1.285300000 |
| O | 2.046400000  | 2.547800000  | -2.386400000 |
| O | 1.986500000  | 2.771300000  | 2.435700000  |
| O | -2.020200000 | -2.554500000 | -2.444700000 |
| O | -3.604000000 | -1.474700000 | -1.248400000 |
| O | -2.134300000 | 2.562400000  | 2.592300000  |
| O | -2.045100000 | 2.316700000  | -2.694300000 |
| H | -1.970679000 | -2.846590000 | 0.216574000  |
| H | -1.027393000 | 1.815899000  | 4.292332000  |
| H | -0.128944000 | 0.510889000  | 4.134110000  |
| H | -0.581639000 | 1.486785000  | -4.500816000 |
| H | -0.004552000 | 4.051986000  | -0.387701000 |
| H | 0.622896000  | 4.488375000  | 1.637911000  |
| H | 0.923612000  | 4.183100000  | -1.664166000 |
| H | 1.881178000  | 0.160234000  | 2.963675000  |
| H | -1.965246000 | 2.877950000  | -0.102632000 |
| H | -0.800141000 | -1.481865000 | 4.564549000  |
| H | 0.881692000  | -2.739117000 | -3.937255000 |
| H | 0.828046000  | -4.180414000 | 1.941686000  |
| H | 0.769316000  | -4.416873000 | -1.307964000 |
| H | -0.008776000 | -3.994496000 | 0.596060000  |

|    |              |              |              |
|----|--------------|--------------|--------------|
| O  | -1.121828000 | 0.122000000  | 1.538964000  |
| O  | -0.026662000 | -3.873743000 | 1.613559000  |
| O  | 1.036994000  | 1.528814000  | 0.025238000  |
| O  | 1.312281000  | 0.154192000  | 2.187062000  |
| O  | -0.072525000 | -1.083948000 | 4.076882000  |
| O  | -0.154363000 | 1.523246000  | 4.001812000  |
| O  | 0.231554000  | -2.037042000 | -3.804170000 |
| O  | 1.033742000  | -1.481440000 | 0.221364000  |
| O  | -1.430852000 | -2.049370000 | 0.221341000  |
| O  | -0.008527000 | -3.951484000 | -0.986365000 |
| O  | -0.100265000 | 3.995643000  | 1.237789000  |
| O  | 0.038197000  | 3.910486000  | -1.391004000 |
| O  | -1.428754000 | 2.079707000  | -0.054379000 |
| O  | 0.196298000  | 1.399109000  | -3.941226000 |
| O  | 1.332231000  | -0.105253000 | -2.008804000 |
| O  | -1.136263000 | -0.095487000 | -1.446846000 |
| Hf | 2.432864000  | 0.006420000  | 0.102519000  |
| Hf | -0.087619000 | -1.613076000 | 2.030982000  |
| Hf | -0.048088000 | 1.953307000  | 1.746419000  |
| Hf | -0.019578000 | 1.615332000  | -1.793411000 |
| Hf | -2.563440000 | -0.003165000 | 0.045264000  |
| Hf | -0.003994000 | -1.901095000 | -1.566504000 |
| Fe | 1.238144000  | -0.289295000 | -4.021257000 |
| O  | 0.302701000  | -0.637978000 | -6.114670000 |
| C  | 4.149174000  | -1.137032000 | -4.711220000 |
| C  | 4.906812000  | -0.089035000 | -3.999606000 |
| H  | 4.693206000  | -1.934078000 | -5.244698000 |
| H  | 0.934471000  | -1.029591000 | -6.725849000 |
| H  | 4.680581000  | 0.894136000  | -4.432955000 |
| H  | 4.580324000  | -0.043015000 | -2.950345000 |
| H  | 5.984333000  | -0.254041000 | -4.042927000 |
| O  | 2.906912000  | -1.165405000 | -4.747547000 |
| H  | -0.153288000 | -1.393094000 | -5.700895000 |

**Reaction on Fe-Ti-NU-1000**

Fe-Ti-NU-1000-O

Free Energy: -4200.160371

Electronic Energy: -4200.325477

|   |              |              |              |
|---|--------------|--------------|--------------|
| C | 5.726500000  | -2.889200000 | -2.160200000 |
| C | -5.638900000 | -2.885100000 | -2.451400000 |
| C | 4.388900000  | -3.187700000 | -2.460000000 |
| C | -4.293000000 | -3.161900000 | -2.734600000 |
| C | 4.106400000  | -4.252600000 | -3.328500000 |
| C | -3.986000000 | -4.236300000 | -3.582700000 |
| C | 5.138200000  | -5.020700000 | -3.859400000 |
| C | -4.998200000 | -5.035200000 | -4.107600000 |
| C | 6.482800000  | -4.751200000 | -3.537700000 |
| C | -6.351100000 | -4.782200000 | -3.807100000 |
| C | 6.755800000  | -3.657500000 | -2.694900000 |
| C | -6.649700000 | -3.679700000 | -2.983400000 |
| C | 5.673400000  | 2.762000000  | -2.369400000 |
| C | -5.668800000 | 2.628900000  | -2.684600000 |
| C | 4.341400000  | 3.021300000  | -2.724800000 |
| C | -4.324800000 | 2.872000000  | -3.008000000 |
| C | 4.069900000  | 4.017800000  | -3.673300000 |
| C | -4.019400000 | 3.907100000  | -3.904900000 |

|   |              |              |              |
|---|--------------|--------------|--------------|
| C | 5.105900000  | 4.760700000  | -4.231200000 |
| C | -5.033000000 | 4.692700000  | -4.448900000 |
| C | 6.444700000  | 4.526400000  | -3.861700000 |
| C | -6.384200000 | 4.462600000  | -4.123400000 |
| C | 6.708200000  | 3.500400000  | -2.934600000 |
| C | -6.680500000 | 3.408600000  | -3.237600000 |
| C | -3.223400000 | -2.332300000 | -2.105800000 |
| C | -3.315200000 | -2.089500000 | 2.441200000  |
| C | -3.322900000 | 2.330100000  | 2.211500000  |
| C | 3.188500000  | 2.437000000  | 2.193700000  |
| C | 3.242000000  | 2.242000000  | -2.086000000 |
| C | 3.280300000  | -2.402400000 | -1.851700000 |
| C | -3.245500000 | 2.084800000  | -2.346700000 |
| C | 3.174600000  | -2.211100000 | 2.426600000  |
| H | 5.937000000  | -2.056700000 | -1.495800000 |
| H | -5.871700000 | -2.048200000 | -1.800500000 |
| H | 3.070800000  | -4.466900000 | -3.573300000 |
| H | -2.943100000 | -4.450000000 | -3.798200000 |
| H | 4.900900000  | -5.847200000 | -4.524400000 |
| H | -4.737200000 | -5.873100000 | -4.749000000 |
| H | 7.786000000  | -3.416500000 | -2.445100000 |
| H | -7.686200000 | -3.452500000 | -2.747200000 |
| H | 5.874800000  | 1.981600000  | -1.642500000 |
| H | -5.899000000 | 1.830200000  | -1.986300000 |
| H | 3.038900000  | 4.198500000  | -3.962800000 |
| H | -2.978300000 | 4.100400000  | -4.145000000 |
| H | 4.876900000  | 5.534100000  | -4.959800000 |
| H | -4.774300000 | 5.498300000  | -5.131200000 |
| H | 7.734600000  | 3.290500000  | -2.644500000 |
| H | -7.714900000 | 3.205600000  | -2.972200000 |
| H | -7.139900000 | -5.409200000 | -4.210200000 |
| H | 7.286100000  | -5.356800000 | -3.944800000 |
| H | -7.172900000 | 5.077500000  | -4.544800000 |
| H | 7.252000000  | 5.109100000  | -4.293600000 |
| H | -4.101094000 | -2.666618000 | 2.881887000  |
| H | 3.964843000  | 3.004750000  | 2.662583000  |
| H | -4.111859000 | 2.914440000  | 2.636930000  |
| H | 3.948377000  | -2.768397000 | 2.911976000  |
| O | -3.663700000 | 1.472100000  | 1.337400000  |
| O | -3.610000000 | 1.255400000  | -1.456700000 |
| O | -3.654000000 | -1.258600000 | 1.542900000  |
| O | -2.127300000 | -2.310200000 | 2.835700000  |
| O | 1.970300000  | -2.521800000 | 2.683600000  |
| O | 2.090000000  | -2.742700000 | -2.140600000 |
| O | 3.548200000  | -1.286100000 | 1.640800000  |
| O | 3.614200000  | -1.448400000 | -1.083700000 |
| O | 3.557200000  | 1.485700000  | 1.438500000  |
| O | 3.591800000  | 1.320300000  | -1.285300000 |
| O | 2.046400000  | 2.547800000  | -2.386400000 |
| O | 1.986500000  | 2.771300000  | 2.435700000  |
| O | -2.020200000 | -2.554500000 | -2.444700000 |
| O | -3.604000000 | -1.474700000 | -1.248400000 |
| O | -2.134300000 | 2.562400000  | 2.592300000  |
| O | -2.045100000 | 2.316700000  | -2.694300000 |
| H | -1.918698000 | -2.722549000 | 0.224199000  |
| H | -0.993390000 | 1.922916000  | 3.892116000  |

|    |              |              |              |
|----|--------------|--------------|--------------|
| H  | -0.151105000 | 0.577926000  | 3.881593000  |
| H  | -0.680630000 | 1.569315000  | -4.170394000 |
| H  | 0.045520000  | 3.816968000  | -0.458675000 |
| H  | 0.682601000  | 4.093923000  | 1.704619000  |
| H  | 0.886039000  | 3.794600000  | -1.800147000 |
| H  | 1.819597000  | 0.149612000  | 2.839903000  |
| H  | -1.888294000 | 2.767438000  | -0.085095000 |
| H  | -0.833290000 | -1.555496000 | 4.167743000  |
| H  | -0.695192000 | -2.038165000 | -3.931427000 |
| H  | 0.816224000  | -3.797593000 | 2.039489000  |
| H  | 0.769544000  | -4.050417000 | -1.424635000 |
| H  | 0.028893000  | -3.759622000 | 0.658771000  |
| O  | -1.121768000 | 0.114869000  | 1.448040000  |
| O  | -0.044923000 | -3.579388000 | 1.640289000  |
| O  | 1.032990000  | 1.393675000  | -0.004626000 |
| O  | 1.288661000  | 0.144628000  | 2.032810000  |
| O  | -0.082722000 | -1.110159000 | 3.748650000  |
| O  | -0.109629000 | 1.558999000  | 3.704166000  |
| O  | 0.105375000  | -1.780614000 | -3.453656000 |
| O  | 1.042259000  | -1.350482000 | 0.181791000  |
| O  | -1.396859000 | -1.909478000 | 0.210227000  |
| O  | -0.007541000 | -3.653936000 | -1.003652000 |
| O  | -0.058275000 | 3.665244000  | 1.251139000  |
| O  | -0.001525000 | 3.621981000  | -1.432584000 |
| O  | -1.389009000 | 1.941072000  | -0.042105000 |
| O  | 0.072643000  | 1.313121000  | -3.622971000 |
| O  | 1.266611000  | -0.109275000 | -1.928923000 |
| O  | -1.131455000 | -0.079542000 | -1.322770000 |
| Ti | 2.430109000  | -0.034737000 | 0.098895000  |
| Ti | -0.124213000 | -1.460931000 | 1.894333000  |
| Ti | 0.022046000  | 1.814092000  | 1.588850000  |
| Ti | -0.082174000 | 1.475223000  | -1.632100000 |
| Ti | -2.519426000 | 0.004953000  | 0.053972000  |
| Ti | -0.005353000 | -1.807594000 | -1.421336000 |
| Fe | 1.154370000  | -0.252424000 | -3.803320000 |
| O  | 1.528016000  | -0.330369000 | -5.377424000 |

Fe-Ti-NU-1000 (Ads\_3)

Free Energy: -4355.148865

Electronic Energy: -4355.39421433

|   |              |              |              |
|---|--------------|--------------|--------------|
| C | 5.726500000  | -2.889200000 | -2.160200000 |
| C | -5.638900000 | -2.885100000 | -2.451400000 |
| C | 4.388900000  | -3.187700000 | -2.460000000 |
| C | -4.293000000 | -3.161900000 | -2.734600000 |
| C | 4.106400000  | -4.252600000 | -3.328500000 |
| C | -3.986000000 | -4.236300000 | -3.582700000 |
| C | 5.138200000  | -5.020700000 | -3.859400000 |
| C | -4.998200000 | -5.035200000 | -4.107600000 |
| C | 6.482800000  | -4.751200000 | -3.537700000 |
| C | -6.351100000 | -4.782200000 | -3.807100000 |
| C | 6.755800000  | -3.657500000 | -2.694900000 |
| C | -6.649700000 | -3.679700000 | -2.983400000 |
| C | 5.673400000  | 2.762000000  | -2.369400000 |
| C | -5.668800000 | 2.628900000  | -2.684600000 |
| C | 4.341400000  | 3.021300000  | -2.724800000 |
| C | -4.324800000 | 2.872000000  | -3.008000000 |

|   |              |              |              |
|---|--------------|--------------|--------------|
| C | 4.069900000  | 4.017800000  | -3.673300000 |
| C | -4.019400000 | 3.907100000  | -3.904900000 |
| C | 5.105900000  | 4.760700000  | -4.231200000 |
| C | -5.033000000 | 4.692700000  | -4.448900000 |
| C | 6.444700000  | 4.526400000  | -3.861700000 |
| C | -6.384200000 | 4.462600000  | -4.123400000 |
| C | 6.708200000  | 3.500400000  | -2.934600000 |
| C | -6.680500000 | 3.408600000  | -3.237600000 |
| C | -3.223400000 | -2.332300000 | -2.105800000 |
| C | -3.315200000 | -2.089500000 | 2.441200000  |
| C | -3.322900000 | 2.330100000  | 2.211500000  |
| C | 3.188500000  | 2.437000000  | 2.193700000  |
| C | 3.242000000  | 2.242000000  | -2.086000000 |
| C | 3.280300000  | -2.402400000 | -1.851700000 |
| C | -3.245500000 | 2.084800000  | -2.346700000 |
| C | 3.174600000  | -2.211100000 | 2.426600000  |
| H | 5.937000000  | -2.056700000 | -1.495800000 |
| H | -5.871700000 | -2.048200000 | -1.800500000 |
| H | 3.070800000  | -4.466900000 | -3.573300000 |
| H | -2.943100000 | -4.450000000 | -3.798200000 |
| H | 4.900900000  | -5.847200000 | -4.524400000 |
| H | -4.737200000 | -5.873100000 | -4.749000000 |
| H | 7.786000000  | -3.416500000 | -2.445100000 |
| H | -7.686200000 | -3.452500000 | -2.747200000 |
| H | 5.874800000  | 1.981600000  | -1.642500000 |
| H | -5.899000000 | 1.830200000  | -1.986300000 |
| H | 3.038900000  | 4.198500000  | -3.962800000 |
| H | -2.978300000 | 4.100400000  | -4.145000000 |
| H | 4.876900000  | 5.534100000  | -4.959800000 |
| H | -4.774300000 | 5.498300000  | -5.131200000 |
| H | 7.734600000  | 3.290500000  | -2.644500000 |
| H | -7.714900000 | 3.205600000  | -2.972200000 |
| H | -7.139900000 | -5.409200000 | -4.210200000 |
| H | 7.286100000  | -5.356800000 | -3.944800000 |
| H | -7.172900000 | 5.077500000  | -4.544800000 |
| H | 7.252000000  | 5.109100000  | -4.293600000 |
| H | -4.101094000 | -2.666618000 | 2.881887000  |
| H | 3.964843000  | 3.004750000  | 2.662583000  |
| H | -4.111859000 | 2.914440000  | 2.636930000  |
| H | 3.948377000  | -2.768397000 | 2.911976000  |
| O | -3.663700000 | 1.472100000  | 1.337400000  |
| O | -3.610000000 | 1.255400000  | -1.456700000 |
| O | -3.654000000 | -1.258600000 | 1.542900000  |
| O | -2.127300000 | -2.310200000 | 2.835700000  |
| O | 1.970300000  | -2.521800000 | 2.683600000  |
| O | 2.090000000  | -2.742700000 | -2.140600000 |
| O | 3.548200000  | -1.286100000 | 1.640800000  |
| O | 3.614200000  | -1.448400000 | -1.083700000 |
| O | 3.557200000  | 1.485700000  | 1.438500000  |
| O | 3.591800000  | 1.320300000  | -1.285300000 |
| O | 2.046400000  | 2.547800000  | -2.386400000 |
| O | 1.986500000  | 2.771300000  | 2.435700000  |
| O | -2.020200000 | -2.554500000 | -2.444700000 |
| O | -3.604000000 | -1.474700000 | -1.248400000 |
| O | -2.134300000 | 2.562400000  | 2.592300000  |
| O | -2.045100000 | 2.316700000  | -2.694300000 |



|    |              |              |              |
|----|--------------|--------------|--------------|
| H  | -1.924023000 | -2.714490000 | 0.222447000  |
| H  | -0.994284000 | 1.919523000  | 3.881783000  |
| H  | -0.150285000 | 0.576175000  | 3.872886000  |
| H  | -0.703368000 | 1.596666000  | -4.163624000 |
| H  | 0.046881000  | 3.804363000  | -0.467958000 |
| H  | 0.685388000  | 4.087956000  | 1.700791000  |
| H  | 0.881297000  | 3.787140000  | -1.809312000 |
| H  | 1.822656000  | 0.147795000  | 2.832677000  |
| H  | -1.884002000 | 2.760782000  | -0.092796000 |
| H  | -0.837233000 | -1.553853000 | 4.160077000  |
| H  | -0.707232000 | -2.085017000 | -3.927113000 |
| H  | 0.818368000  | -3.789271000 | 2.014518000  |
| H  | 0.787678000  | -4.014432000 | -1.413774000 |
| H  | 0.027461000  | -3.736130000 | 0.631891000  |
| O  | -1.121647000 | 0.116176000  | 1.447329000  |
| O  | -0.044706000 | -3.571817000 | 1.619768000  |
| O  | 1.037093000  | 1.391431000  | -0.009824000 |
| O  | 1.287840000  | 0.142603000  | 2.028415000  |
| O  | -0.083669000 | -1.111207000 | 3.743802000  |
| O  | -0.108502000 | 1.557898000  | 3.698767000  |
| O  | 0.100277000  | -1.815767000 | -3.468225000 |
| O  | 1.039240000  | -1.344203000 | 0.170204000  |
| O  | -1.403060000 | -1.901138000 | 0.208043000  |
| O  | -0.006716000 | -3.634651000 | -1.010929000 |
| O  | -0.058677000 | 3.664193000  | 1.248003000  |
| O  | -0.004678000 | 3.613902000  | -1.441301000 |
| O  | -1.386863000 | 1.933599000  | -0.045169000 |
| O  | 0.078775000  | 1.381289000  | -3.638588000 |
| O  | 1.194066000  | -0.104423000 | -1.975446000 |
| O  | -1.165130000 | -0.084128000 | -1.338020000 |
| Ti | 2.407018000  | -0.041518000 | 0.094560000  |
| Ti | -0.127687000 | -1.459463000 | 1.887240000  |
| Ti | 0.023557000  | 1.812320000  | 1.579946000  |
| Ti | -0.082275000 | 1.451765000  | -1.652001000 |
| Ti | -2.523196000 | 0.006989000  | 0.051531000  |
| Ti | -0.025928000 | -1.783616000 | -1.455348000 |
| Fe | 1.068579000  | -0.230417000 | -3.940809000 |
| O  | 0.864727000  | -0.285564000 | -5.558391000 |
| C  | 3.899903000  | 0.247305000  | -4.840449000 |
| C  | 5.349853000  | 0.054115000  | -4.493825000 |
| H  | 3.676243000  | 0.121011000  | -5.905225000 |
| H  | 3.541179000  | 1.237406000  | -4.540691000 |
| H  | 5.481352000  | 0.123646000  | -3.410251000 |
| H  | 5.718487000  | -0.921952000 | -4.827169000 |
| H  | 5.956198000  | 0.831153000  | -4.968172000 |
| O  | 3.089237000  | -0.683591000 | -4.070469000 |
| H  | 3.183935000  | -1.571988000 | -4.445000000 |

Fe-Ti-NU-1000 (TS1\_3)

Free Energy: -4355.127378

Electronic Energy: -4355.36762066

|   |              |              |              |
|---|--------------|--------------|--------------|
| C | 5.726500000  | -2.889200000 | -2.160200000 |
| C | -5.638900000 | -2.885100000 | -2.451400000 |
| C | 4.388900000  | -3.187700000 | -2.460000000 |
| C | -4.293000000 | -3.161900000 | -2.734600000 |
| C | 4.106400000  | -4.252600000 | -3.328500000 |

|   |             |             |             |
|---|-------------|-------------|-------------|
| C | -3.98600000 | -4.23630000 | -3.58270000 |
| C | 5.13820000  | -5.02070000 | -3.85940000 |
| C | -4.99820000 | -5.03520000 | -4.10760000 |
| C | 6.48280000  | -4.75120000 | -3.53770000 |
| C | -6.35110000 | -4.78220000 | -3.80710000 |
| C | 6.75580000  | -3.65750000 | -2.69490000 |
| C | -6.64970000 | -3.67970000 | -2.98340000 |
| C | 5.67340000  | 2.76200000  | -2.36940000 |
| C | -5.66880000 | 2.62890000  | -2.68460000 |
| C | 4.34140000  | 3.02130000  | -2.72480000 |
| C | -4.32480000 | 2.87200000  | -3.00800000 |
| C | 4.06990000  | 4.01780000  | -3.67330000 |
| C | -4.01940000 | 3.90710000  | -3.90490000 |
| C | 5.10590000  | 4.76070000  | -4.23120000 |
| C | -5.03300000 | 4.69270000  | -4.44890000 |
| C | 6.44470000  | 4.52640000  | -3.86170000 |
| C | -6.38420000 | 4.46260000  | -4.12340000 |
| C | 6.70820000  | 3.50040000  | -2.93460000 |
| C | -6.68050000 | 3.40860000  | -3.23760000 |
| C | -3.22340000 | -2.33230000 | -2.10580000 |
| C | -3.31520000 | -2.08950000 | 2.44120000  |
| C | -3.32290000 | 2.33010000  | 2.21150000  |
| C | 3.18850000  | 2.43700000  | 2.19370000  |
| C | 3.24200000  | 2.24200000  | -2.08600000 |
| C | 3.28030000  | -2.40240000 | -1.85170000 |
| C | -3.24550000 | 2.08480000  | -2.34670000 |
| C | 3.17460000  | -2.21110000 | 2.42660000  |
| H | 5.93700000  | -2.05670000 | -1.49580000 |
| H | -5.87170000 | -2.04820000 | -1.80050000 |
| H | 3.07080000  | -4.46690000 | -3.57330000 |
| H | -2.94310000 | -4.45000000 | -3.79820000 |
| H | 4.90090000  | -5.84720000 | -4.52440000 |
| H | -4.73720000 | -5.87310000 | -4.74900000 |
| H | 7.78600000  | -3.41650000 | -2.44510000 |
| H | -7.68620000 | -3.45250000 | -2.74720000 |
| H | 5.87480000  | 1.98160000  | -1.64250000 |
| H | -5.89900000 | 1.83020000  | -1.98630000 |
| H | 3.03890000  | 4.19850000  | -3.96280000 |
| H | -2.97830000 | 4.10040000  | -4.14500000 |
| H | 4.87690000  | 5.53410000  | -4.95980000 |
| H | -4.77430000 | 5.49830000  | -5.13120000 |
| H | 7.73460000  | 3.29050000  | -2.64450000 |
| H | -7.71490000 | 3.20560000  | -2.97220000 |
| H | -7.13990000 | -5.40920000 | -4.21020000 |
| H | 7.28610000  | -5.35680000 | -3.94480000 |
| H | -7.17290000 | 5.07750000  | -4.54480000 |
| H | 7.25200000  | 5.10910000  | -4.29360000 |
| H | -4.10109400 | -2.66661800 | 2.88188700  |
| H | 3.96484300  | 3.00475000  | 2.66258300  |
| H | -4.11185900 | 2.91444000  | 2.63693000  |
| H | 3.94837700  | -2.76839700 | 2.91197600  |
| O | -3.66370000 | 1.47210000  | 1.33740000  |
| O | -3.61000000 | 1.25540000  | -1.45670000 |
| O | -3.65400000 | -1.25860000 | 1.54290000  |
| O | -2.12730000 | -2.31020000 | 2.83570000  |
| O | 1.97030000  | -2.52180000 | 2.68360000  |

|    |              |              |              |
|----|--------------|--------------|--------------|
| O  | 2.090000000  | -2.742700000 | -2.140600000 |
| O  | 3.548200000  | -1.286100000 | 1.640800000  |
| O  | 3.614200000  | -1.448400000 | -1.083700000 |
| O  | 3.557200000  | 1.485700000  | 1.438500000  |
| O  | 3.591800000  | 1.320300000  | -1.285300000 |
| O  | 2.046400000  | 2.547800000  | -2.386400000 |
| O  | 1.986500000  | 2.771300000  | 2.435700000  |
| O  | -2.020200000 | -2.554500000 | -2.444700000 |
| O  | -3.604000000 | -1.474700000 | -1.248400000 |
| O  | -2.134300000 | 2.562400000  | 2.592300000  |
| O  | -2.045100000 | 2.316700000  | -2.694300000 |
| H  | -1.915910000 | -2.708849000 | 0.215356000  |
| H  | -0.991323000 | 1.926271000  | 3.866454000  |
| H  | -0.152540000 | 0.579948000  | 3.864554000  |
| H  | -0.760838000 | 1.602497000  | -4.115709000 |
| H  | 0.054016000  | 3.823326000  | -0.469936000 |
| H  | 0.680249000  | 4.094528000  | 1.700836000  |
| H  | 0.892031000  | 3.801938000  | -1.814252000 |
| H  | 1.815865000  | 0.148764000  | 2.837652000  |
| H  | -1.879083000 | 2.768620000  | -0.085477000 |
| H  | -0.838171000 | -1.552232000 | 4.144913000  |
| H  | -0.719909000 | -2.012806000 | -3.930926000 |
| H  | 0.816941000  | -3.792626000 | 2.019017000  |
| H  | 0.764372000  | -4.046206000 | -1.434093000 |
| H  | 0.030373000  | -3.745770000 | 0.634175000  |
| O  | -1.114232000 | 0.119968000  | 1.437583000  |
| O  | -0.041214000 | -3.567650000 | 1.618129000  |
| O  | 1.049366000  | 1.381470000  | -0.023881000 |
| O  | 1.295125000  | 0.142884000  | 2.023943000  |
| O  | -0.082752000 | -1.108744000 | 3.731998000  |
| O  | -0.105961000 | 1.560348000  | 3.687061000  |
| O  | 0.101805000  | -1.794353000 | -3.468652000 |
| O  | 1.053808000  | -1.325342000 | 0.145996000  |
| O  | -1.391298000 | -1.897623000 | 0.199002000  |
| O  | -0.008335000 | -3.642899000 | -1.012514000 |
| O  | -0.051904000 | 3.662224000  | 1.237242000  |
| O  | 0.004556000  | 3.631879000  | -1.444189000 |
| O  | -1.378649000 | 1.942391000  | -0.054561000 |
| O  | 0.049614000  | 1.403664000  | -3.626775000 |
| O  | 1.254233000  | -0.100430000 | -2.034240000 |
| O  | -1.123439000 | -0.074810000 | -1.341260000 |
| Ti | 2.443838000  | -0.026907000 | 0.106016000  |
| Ti | -0.120173000 | -1.455050000 | 1.877446000  |
| Ti | 0.031906000  | 1.809909000  | 1.568930000  |
| Ti | -0.072523000 | 1.490817000  | -1.662938000 |
| Ti | -2.509438000 | 0.007432000  | 0.036192000  |
| Ti | -0.002181000 | -1.797807000 | -1.455614000 |
| Fe | 1.083213000  | -0.217559000 | -3.903361000 |
| O  | 0.866725000  | -0.292305000 | -5.604126000 |
| C  | 3.923507000  | -0.668529000 | -4.776583000 |
| C  | 5.135981000  | -0.189108000 | -4.025467000 |
| H  | 3.578033000  | -1.642604000 | -4.397424000 |
| H  | 4.151600000  | -0.817605000 | -5.841278000 |
| H  | 5.474434000  | 0.771556000  | -4.423727000 |
| H  | 4.910636000  | -0.061133000 | -2.962009000 |
| H  | 5.949265000  | -0.914446000 | -4.124895000 |

|   |             |             |              |
|---|-------------|-------------|--------------|
| O | 2.867779000 | 0.295721000 | -4.688657000 |
| H | 2.009718000 | 0.087225000 | -5.565530000 |

Fe-Ti-NU-1000 (Int\_3)

Free Energy: -4355.165108

Electronic Energy: -4355.40682698

|   |              |              |              |
|---|--------------|--------------|--------------|
| C | 5.726500000  | -2.889200000 | -2.160200000 |
| C | -5.638900000 | -2.885100000 | -2.451400000 |
| C | 4.388900000  | -3.187700000 | -2.460000000 |
| C | -4.293000000 | -3.161900000 | -2.734600000 |
| C | 4.106400000  | -4.252600000 | -3.328500000 |
| C | -3.986000000 | -4.236300000 | -3.582700000 |
| C | 5.138200000  | -5.020700000 | -3.859400000 |
| C | -4.998200000 | -5.035200000 | -4.107600000 |
| C | 6.482800000  | -4.751200000 | -3.537700000 |
| C | -6.351100000 | -4.782200000 | -3.807100000 |
| C | 6.755800000  | -3.657500000 | -2.694900000 |
| C | -6.649700000 | -3.679700000 | -2.983400000 |
| C | 5.673400000  | 2.762000000  | -2.369400000 |
| C | -5.668800000 | 2.628900000  | -2.684600000 |
| C | 4.341400000  | 3.021300000  | -2.724800000 |
| C | -4.324800000 | 2.872000000  | -3.008000000 |
| C | 4.069900000  | 4.017800000  | -3.673300000 |
| C | -4.019400000 | 3.907100000  | -3.904900000 |
| C | 5.105900000  | 4.760700000  | -4.231200000 |
| C | -5.033000000 | 4.692700000  | -4.448900000 |
| C | 6.444700000  | 4.526400000  | -3.861700000 |
| C | -6.384200000 | 4.462600000  | -4.123400000 |
| C | 6.708200000  | 3.500400000  | -2.934600000 |
| C | -6.680500000 | 3.408600000  | -3.237600000 |
| C | -3.223400000 | -2.332300000 | -2.105800000 |
| C | -3.315200000 | -2.089500000 | 2.441200000  |
| C | -3.322900000 | 2.330100000  | 2.211500000  |
| C | 3.188500000  | 2.437000000  | 2.193700000  |
| C | 3.242000000  | 2.242000000  | -2.086000000 |
| C | 3.280300000  | -2.402400000 | -1.851700000 |
| C | -3.245500000 | 2.084800000  | -2.346700000 |
| C | 3.174600000  | -2.211100000 | 2.426600000  |
| H | 5.937000000  | -2.056700000 | -1.495800000 |
| H | -5.871700000 | -2.048200000 | -1.800500000 |
| H | 3.070800000  | -4.466900000 | -3.573300000 |
| H | -2.943100000 | -4.450000000 | -3.798200000 |
| H | 4.900900000  | -5.847200000 | -4.524400000 |
| H | -4.737200000 | -5.873100000 | -4.749000000 |
| H | 7.786000000  | -3.416500000 | -2.445100000 |
| H | -7.686200000 | -3.452500000 | -2.747200000 |
| H | 5.874800000  | 1.981600000  | -1.642500000 |
| H | -5.899000000 | 1.830200000  | -1.986300000 |
| H | 3.038900000  | 4.198500000  | -3.962800000 |
| H | -2.978300000 | 4.100400000  | -4.145000000 |
| H | 4.876900000  | 5.534100000  | -4.959800000 |
| H | -4.774300000 | 5.498300000  | -5.131200000 |
| H | 7.734600000  | 3.290500000  | -2.644500000 |
| H | -7.714900000 | 3.205600000  | -2.972200000 |
| H | -7.139900000 | -5.409200000 | -4.210200000 |
| H | 7.286100000  | -5.356800000 | -3.944800000 |

|    |              |              |              |
|----|--------------|--------------|--------------|
| H  | -7.172900000 | 5.077500000  | -4.544800000 |
| H  | 7.252000000  | 5.109100000  | -4.293600000 |
| H  | -4.101094000 | -2.666618000 | 2.881887000  |
| H  | 3.964843000  | 3.004750000  | 2.662583000  |
| H  | -4.111859000 | 2.914440000  | 2.636930000  |
| H  | 3.948377000  | -2.768397000 | 2.911976000  |
| O  | -3.663700000 | 1.472100000  | 1.337400000  |
| O  | -3.610000000 | 1.255400000  | -1.456700000 |
| O  | -3.654000000 | -1.258600000 | 1.542900000  |
| O  | -2.127300000 | -2.310200000 | 2.835700000  |
| O  | 1.970300000  | -2.521800000 | 2.683600000  |
| O  | 2.090000000  | -2.742700000 | -2.140600000 |
| O  | 3.548200000  | -1.286100000 | 1.640800000  |
| O  | 3.614200000  | -1.448400000 | -1.083700000 |
| O  | 3.557200000  | 1.485700000  | 1.438500000  |
| O  | 3.591800000  | 1.320300000  | -1.285300000 |
| O  | 2.046400000  | 2.547800000  | -2.386400000 |
| O  | 1.986500000  | 2.771300000  | 2.435700000  |
| O  | -2.020200000 | -2.554500000 | -2.444700000 |
| O  | -3.604000000 | -1.474700000 | -1.248400000 |
| O  | -2.134300000 | 2.562400000  | 2.592300000  |
| O  | -2.045100000 | 2.316700000  | -2.694300000 |
| H  | -1.914873000 | -2.723865000 | 0.231451000  |
| H  | -0.992640000 | 1.925420000  | 3.878895000  |
| H  | -0.149815000 | 0.581527000  | 3.874670000  |
| H  | -0.686859000 | 1.427464000  | -4.128988000 |
| H  | 0.039533000  | 3.801464000  | -0.470720000 |
| H  | 0.680199000  | 4.090652000  | 1.692108000  |
| H  | 0.895015000  | 3.777982000  | -1.802302000 |
| H  | 1.821455000  | 0.157874000  | 2.839298000  |
| H  | -1.893306000 | 2.754832000  | -0.085924000 |
| H  | -0.838521000 | -1.549626000 | 4.159619000  |
| H  | -0.841851000 | -1.666655000 | -3.708748000 |
| H  | 0.817252000  | -3.798344000 | 2.052026000  |
| H  | 0.753404000  | -4.074928000 | -1.416728000 |
| H  | 0.030384000  | -3.766592000 | 0.670587000  |
| O  | -1.116845000 | 0.114877000  | 1.448592000  |
| O  | -0.044512000 | -3.583505000 | 1.652445000  |
| O  | 1.038191000  | 1.385589000  | -0.015662000 |
| O  | 1.292197000  | 0.147621000  | 2.031306000  |
| O  | -0.080008000 | -1.109625000 | 3.748813000  |
| O  | -0.107379000 | 1.561964000  | 3.696280000  |
| O  | 0.081631000  | -1.733139000 | -3.418833000 |
| O  | 1.050874000  | -1.355034000 | 0.189463000  |
| O  | -1.392857000 | -1.911115000 | 0.215876000  |
| O  | -0.007195000 | -3.662784000 | -0.983262000 |
| O  | -0.058704000 | 3.659652000  | 1.238051000  |
| O  | 0.000325000  | 3.613327000  | -1.446209000 |
| O  | -1.386603000 | 1.932694000  | -0.053952000 |
| O  | 0.104782000  | 1.241997000  | -3.608246000 |
| O  | 1.291092000  | -0.123078000 | -1.900238000 |
| O  | -1.125430000 | -0.088484000 | -1.326120000 |
| Ti | 2.436048000  | -0.013842000 | 0.094053000  |
| Ti | -0.115657000 | -1.463247000 | 1.894595000  |
| Ti | 0.024885000  | 1.808093000  | 1.575794000  |
| Ti | -0.080778000 | 1.471100000  | -1.673891000 |

|    |              |              |              |
|----|--------------|--------------|--------------|
| Ti | -2.505681000 | 0.007390000  | 0.051566000  |
| Ti | 0.008224000  | -1.812769000 | -1.401508000 |
| Fe | 1.395191000  | -0.326307000 | -3.752192000 |
| O  | 1.301830000  | -0.745256000 | -5.504309000 |
| C  | 3.984491000  | -0.432633000 | -4.835132000 |
| C  | 5.349812000  | 0.192901000  | -4.653119000 |
| H  | 4.027463000  | -1.515314000 | -4.635784000 |
| H  | 3.606645000  | -0.309695000 | -5.860367000 |
| H  | 5.335927000  | 1.255071000  | -4.910960000 |
| H  | 5.676203000  | 0.101740000  | -3.613330000 |
| H  | 6.075467000  | -0.316164000 | -5.294454000 |
| O  | 3.085784000  | 0.179861000  | -3.938053000 |
| H  | 0.659834000  | -1.461457000 | -5.607388000 |

Fe-Ti-NU-1000 (TS2\_3)

Free Energy: -4355.148563

Electronic Energy: -4355.38536989

|   |              |              |              |
|---|--------------|--------------|--------------|
| C | 5.726500000  | -2.889200000 | -2.160200000 |
| C | -5.638900000 | -2.885100000 | -2.451400000 |
| C | 4.388900000  | -3.187700000 | -2.460000000 |
| C | -4.293000000 | -3.161900000 | -2.734600000 |
| C | 4.106400000  | -4.252600000 | -3.328500000 |
| C | -3.986000000 | -4.236300000 | -3.582700000 |
| C | 5.138200000  | -5.020700000 | -3.859400000 |
| C | -4.998200000 | -5.035200000 | -4.107600000 |
| C | 6.482800000  | -4.751200000 | -3.537700000 |
| C | -6.351100000 | -4.782200000 | -3.807100000 |
| C | 6.755800000  | -3.657500000 | -2.694900000 |
| C | -6.649700000 | -3.679700000 | -2.983400000 |
| C | 5.673400000  | 2.762000000  | -2.369400000 |
| C | -5.668800000 | 2.628900000  | -2.684600000 |
| C | 4.341400000  | 3.021300000  | -2.724800000 |
| C | -4.324800000 | 2.872000000  | -3.008000000 |
| C | 4.069900000  | 4.017800000  | -3.673300000 |
| C | -4.019400000 | 3.907100000  | -3.904900000 |
| C | 5.105900000  | 4.760700000  | -4.231200000 |
| C | -5.033000000 | 4.692700000  | -4.448900000 |
| C | 6.444700000  | 4.526400000  | -3.861700000 |
| C | -6.384200000 | 4.462600000  | -4.123400000 |
| C | 6.708200000  | 3.500400000  | -2.934600000 |
| C | -6.680500000 | 3.408600000  | -3.237600000 |
| C | -3.223400000 | -2.332300000 | -2.105800000 |
| C | -3.315200000 | -2.089500000 | 2.441200000  |
| C | -3.322900000 | 2.330100000  | 2.211500000  |
| C | 3.188500000  | 2.437000000  | 2.193700000  |
| C | 3.242000000  | 2.242000000  | -2.086000000 |
| C | 3.280300000  | -2.402400000 | -1.851700000 |
| C | -3.245500000 | 2.084800000  | -2.346700000 |
| C | 3.174600000  | -2.211100000 | 2.426600000  |
| H | 5.937000000  | -2.056700000 | -1.495800000 |
| H | -5.871700000 | -2.048200000 | -1.800500000 |
| H | 3.070800000  | -4.466900000 | -3.573300000 |
| H | -2.943100000 | -4.450000000 | -3.798200000 |
| H | 4.900900000  | -5.847200000 | -4.524400000 |
| H | -4.737200000 | -5.873100000 | -4.749000000 |
| H | 7.786000000  | -3.416500000 | -2.445100000 |

|   |              |              |              |
|---|--------------|--------------|--------------|
| H | -7.686200000 | -3.452500000 | -2.747200000 |
| H | 5.874800000  | 1.981600000  | -1.642500000 |
| H | -5.899000000 | 1.830200000  | -1.986300000 |
| H | 3.038900000  | 4.198500000  | -3.962800000 |
| H | -2.978300000 | 4.100400000  | -4.145000000 |
| H | 4.876900000  | 5.534100000  | -4.959800000 |
| H | -4.774300000 | 5.498300000  | -5.131200000 |
| H | 7.734600000  | 3.290500000  | -2.644500000 |
| H | -7.714900000 | 3.205600000  | -2.972200000 |
| H | -7.139900000 | -5.409200000 | -4.210200000 |
| H | 7.286100000  | -5.356800000 | -3.944800000 |
| H | -7.172900000 | 5.077500000  | -4.544800000 |
| H | 7.252000000  | 5.109100000  | -4.293600000 |
| H | -4.101094000 | -2.666618000 | 2.881887000  |
| H | 3.964843000  | 3.004750000  | 2.662583000  |
| H | -4.111859000 | 2.914440000  | 2.636930000  |
| H | 3.948377000  | -2.768397000 | 2.911976000  |
| O | -3.663700000 | 1.472100000  | 1.337400000  |
| O | -3.610000000 | 1.255400000  | -1.456700000 |
| O | -3.654000000 | -1.258600000 | 1.542900000  |
| O | -2.127300000 | -2.310200000 | 2.835700000  |
| O | 1.970300000  | -2.521800000 | 2.683600000  |
| O | 2.090000000  | -2.742700000 | -2.140600000 |
| O | 3.548200000  | -1.286100000 | 1.640800000  |
| O | 3.614200000  | -1.448400000 | -1.083700000 |
| O | 3.557200000  | 1.485700000  | 1.438500000  |
| O | 3.591800000  | 1.320300000  | -1.285300000 |
| O | 2.046400000  | 2.547800000  | -2.386400000 |
| O | 1.986500000  | 2.771300000  | 2.435700000  |
| O | -2.020200000 | -2.554500000 | -2.444700000 |
| O | -3.604000000 | -1.474700000 | -1.248400000 |
| O | -2.134300000 | 2.562400000  | 2.592300000  |
| O | -2.045100000 | 2.316700000  | -2.694300000 |
| H | -1.926580000 | -2.715117000 | 0.217379000  |
| H | -0.999703000 | 1.908374000  | 3.899727000  |
| H | -0.146775000 | 0.569556000  | 3.883832000  |
| H | -0.821245000 | 1.349415000  | -3.956817000 |
| H | 0.033522000  | 3.816279000  | -0.434943000 |
| H | 0.686362000  | 4.092980000  | 1.713784000  |
| H | 0.882119000  | 3.810675000  | -1.769391000 |
| H | 1.829801000  | 0.140713000  | 2.829295000  |
| H | -1.909109000 | 2.754617000  | -0.080306000 |
| H | -0.837648000 | -1.556155000 | 4.168173000  |
| H | -0.732092000 | -1.801839000 | -3.870060000 |
| H | 0.822764000  | -3.793667000 | 2.022714000  |
| H | 0.789483000  | -4.035865000 | -1.419393000 |
| H | 0.025775000  | -3.750744000 | 0.647805000  |
| O | -1.122767000 | 0.113222000  | 1.454497000  |
| O | -0.045025000 | -3.584776000 | 1.632387000  |
| O | 1.031380000  | 1.419131000  | 0.016521000  |
| O | 1.283477000  | 0.141977000  | 2.032811000  |
| O | -0.082903000 | -1.114824000 | 3.752747000  |
| O | -0.112256000 | 1.553053000  | 3.713900000  |
| O | 0.148238000  | -1.686948000 | -3.486637000 |
| O | 1.032414000  | -1.369258000 | 0.194020000  |
| O | -1.397378000 | -1.907089000 | 0.206409000  |

|    |              |              |              |
|----|--------------|--------------|--------------|
| O  | -0.002655000 | -3.647676000 | -1.018632000 |
| O  | -0.065267000 | 3.674405000  | 1.268467000  |
| O  | -0.005866000 | 3.629986000  | -1.411870000 |
| O  | -1.395265000 | 1.937776000  | -0.037521000 |
| O  | 0.060835000  | 1.281466000  | -3.565559000 |
| O  | 1.319191000  | -0.093389000 | -1.834986000 |
| O  | -1.119570000 | -0.084122000 | -1.321481000 |
| Ti | 2.396991000  | -0.038137000 | 0.086287000  |
| Ti | -0.126154000 | -1.466698000 | 1.895280000  |
| Ti | 0.018037000  | 1.819944000  | 1.599435000  |
| Ti | -0.075753000 | 1.477406000  | -1.622016000 |
| Ti | -2.502739000 | -0.002266000 | 0.057236000  |
| Ti | 0.015766000  | -1.803024000 | -1.449060000 |
| Fe | 1.433347000  | -0.222564000 | -3.742929000 |
| O  | 1.884395000  | 0.668353000  | -5.420293000 |
| C  | 4.082463000  | -0.324741000 | -4.815344000 |
| C  | 4.804534000  | -1.241707000 | -5.763276000 |
| H  | 3.265270000  | 0.401925000  | -5.439645000 |
| H  | 4.705001000  | 0.442549000  | -4.315585000 |
| H  | 5.479650000  | -1.897602000 | -5.199628000 |
| H  | 4.098221000  | -1.879705000 | -6.300465000 |
| H  | 5.397923000  | -0.675741000 | -6.485294000 |
| O  | 3.202379000  | -0.900888000 | -4.002730000 |
| H  | 1.617768000  | 1.599742000  | -5.433420000 |

Fe-Ti-NU-1000 (Prod\_3)

Free Energy: -4355.192431

Electronic Energy: -4355.42970317

|   |              |              |              |
|---|--------------|--------------|--------------|
| C | 5.726499000  | -2.889201000 | -2.160200000 |
| C | -5.638900000 | -2.885100000 | -2.451400000 |
| C | 4.388900000  | -3.187703000 | -2.459996000 |
| C | -4.293001000 | -3.161893000 | -2.734608000 |
| C | 4.106400000  | -4.252600000 | -3.328500000 |
| C | -3.986000000 | -4.236300000 | -3.582700000 |
| C | 5.138200000  | -5.020700000 | -3.859400000 |
| C | -4.998200000 | -5.035200000 | -4.107600000 |
| C | 6.482800000  | -4.751200000 | -3.537700000 |
| C | -6.351100000 | -4.782200000 | -3.807100000 |
| C | 6.755800000  | -3.657500000 | -2.694900000 |
| C | -6.649700000 | -3.679700000 | -2.983400000 |
| C | 5.673400000  | 2.762000000  | -2.369400000 |
| C | -5.668800000 | 2.628900000  | -2.684600000 |
| C | 4.341400000  | 3.021294000  | -2.724808000 |
| C | -4.324801000 | 2.871994000  | -3.008006000 |
| C | 4.069900000  | 4.017800000  | -3.673300000 |
| C | -4.019400000 | 3.907100000  | -3.904900000 |
| C | 5.105900000  | 4.760700000  | -4.231200000 |
| C | -5.033000000 | 4.692700000  | -4.448900000 |
| C | 6.444700000  | 4.526400000  | -3.861700000 |
| C | -6.384200000 | 4.462600000  | -4.123400000 |
| C | 6.708200000  | 3.500400000  | -2.934600000 |
| C | -6.680500000 | 3.408600000  | -3.237600000 |
| C | -3.223387000 | -2.332289000 | -2.105806000 |
| C | -3.315197000 | -2.089490000 | 2.441208000  |
| C | -3.322923000 | 2.330098000  | 2.211511000  |
| C | 3.188491000  | 2.436975000  | 2.193655000  |



|   |              |              |              |
|---|--------------|--------------|--------------|
| C | 3.241995000  | 2.242006000  | -2.085991000 |
| C | 3.280283000  | -2.402408000 | -1.851683000 |
| C | -3.245500000 | 2.084807000  | -2.346694000 |
| C | 3.174651000  | -2.211229000 | 2.426735000  |
| H | 5.937000000  | -2.056700000 | -1.495800000 |
| H | -5.871700000 | -2.048200000 | -1.800500000 |
| H | 3.070800000  | -4.466900000 | -3.573300000 |
| H | -2.943100000 | -4.450000000 | -3.798200000 |
| H | 4.900900000  | -5.847200000 | -4.524400000 |
| H | -4.737200000 | -5.873100000 | -4.749000000 |
| H | 7.786000000  | -3.416500000 | -2.445100000 |
| H | -7.686200000 | -3.452500000 | -2.747200000 |
| H | 5.874800000  | 1.981600000  | -1.642500000 |
| H | -5.899000000 | 1.830200000  | -1.986300000 |
| H | 3.038900000  | 4.198500000  | -3.962800000 |
| H | -2.978300000 | 4.100400000  | -4.145000000 |
| H | 4.876900000  | 5.534100000  | -4.959800000 |
| H | -4.774300000 | 5.498300000  | -5.131200000 |
| H | 7.734600000  | 3.290500000  | -2.644500000 |
| H | -7.714900000 | 3.205600000  | -2.972200000 |
| H | -7.139900000 | -5.409200000 | -4.210200000 |
| H | 7.286100000  | -5.356800000 | -3.944800000 |
| H | -7.172900000 | 5.077500000  | -4.544800000 |
| H | 7.252000000  | 5.109100000  | -4.293600000 |
| H | -4.101094000 | -2.666621000 | 2.881884000  |
| H | 3.964843000  | 3.004756000  | 2.662576000  |
| H | -4.111858000 | 2.914443000  | 2.636927000  |
| H | 3.948377000  | -2.768441000 | 2.911924000  |
| O | -3.663737000 | 1.472052000  | 1.337378000  |
| O | -3.609930000 | 1.255374000  | -1.456651000 |
| O | -3.653912000 | -1.258606000 | 1.542947000  |
| O | -2.127301000 | -2.310194000 | 2.835706000  |
| O | 1.970073000  | -2.521668000 | 2.683433000  |
| O | 2.090000000  | -2.742698000 | -2.140602000 |
| O | 3.548256000  | -1.286010000 | 1.640825000  |
| O | 3.614119000  | -1.448407000 | -1.083665000 |
| O | 3.557214000  | 1.485761000  | 1.438516000  |
| O | 3.591771000  | 1.320352000  | -1.285261000 |
| O | 2.046400000  | 2.547804000  | -2.386396000 |
| O | 1.986508000  | 2.771194000  | 2.435573000  |
| O | -2.020200000 | -2.554504000 | -2.444696000 |
| O | -3.603874000 | -1.474675000 | -1.248371000 |
| O | -2.134301000 | 2.562396000  | 2.592305000  |
| O | -2.045099000 | 2.316708000  | -2.694292000 |
| H | -1.969972000 | -2.687442000 | 0.200614000  |
| H | -1.004135000 | 1.908229000  | 3.914521000  |
| H | -0.145584000 | 0.572692000  | 3.885057000  |
| H | -0.726301000 | 1.564137000  | -4.039803000 |
| H | 0.040207000  | 3.814037000  | -0.447327000 |
| H | 0.701847000  | 4.079661000  | 1.708304000  |
| H | 0.880006000  | 3.815510000  | -1.786159000 |
| H | 1.833888000  | 0.146893000  | 2.808975000  |
| H | -1.907037000 | 2.757335000  | -0.105082000 |
| H | -0.837881000 | -1.546763000 | 4.180791000  |
| H | 0.540708000  | -2.650441000 | -3.701110000 |
| H | 0.822118000  | -3.764522000 | 1.992966000  |

|    |              |              |              |
|----|--------------|--------------|--------------|
| H  | 0.843652000  | -3.973073000 | -1.319004000 |
| H  | -0.010168000 | -3.720162000 | 0.636252000  |
| O  | -1.136496000 | 0.121862000  | 1.450742000  |
| O  | -0.060922000 | -3.574948000 | 1.625981000  |
| O  | 1.021510000  | 1.442456000  | 0.021106000  |
| O  | 1.265976000  | 0.150211000  | 2.027868000  |
| O  | -0.090141000 | -1.102579000 | 3.756932000  |
| O  | -0.117192000 | 1.558451000  | 3.719125000  |
| O  | 0.132624000  | -1.795798000 | -3.513400000 |
| O  | 1.000455000  | -1.378092000 | 0.209418000  |
| O  | -1.426832000 | -1.889159000 | 0.206670000  |
| O  | -0.010391000 | -3.620231000 | -1.031463000 |
| O  | -0.070184000 | 3.684480000  | 1.274953000  |
| O  | -0.004437000 | 3.631355000  | -1.423047000 |
| O  | -1.395117000 | 1.940313000  | -0.046729000 |
| O  | 0.112470000  | 1.374824000  | -3.598739000 |
| O  | 1.271494000  | -0.095127000 | -1.826188000 |
| O  | -1.149713000 | -0.080257000 | -1.349069000 |
| Ti | 2.323244000  | -0.021906000 | 0.085589000  |
| Ti | -0.151539000 | -1.458862000 | 1.897252000  |
| Ti | -0.005971000 | 1.831124000  | 1.605456000  |
| Ti | -0.062213000 | 1.468455000  | -1.641015000 |
| Ti | -2.520084000 | -0.001943000 | 0.040770000  |
| Ti | -0.028709000 | -1.756823000 | -1.463327000 |
| Fe | 1.279890000  | -0.201709000 | -3.865147000 |
| O  | 0.464205000  | -0.479427000 | -5.955007000 |
| C  | 4.192152000  | -1.108349000 | -4.590309000 |
| C  | 4.989785000  | -0.074967000 | -3.907181000 |
| H  | 4.707791000  | -1.947377000 | -5.089191000 |
| H  | 1.041504000  | -1.037203000 | -6.487145000 |
| H  | 4.812527000  | 0.902312000  | -4.372886000 |
| H  | 4.646999000  | 0.019913000  | -2.864434000 |
| H  | 6.058124000  | -0.292557000 | -3.931183000 |
| O  | 2.954813000  | -1.090809000 | -4.641695000 |
| H  | -0.249672000 | -1.063595000 | -5.657260000 |

### Functionalization

Fe-NU-1000-Br-O

Free Energy: -14415.349938

Electronic Energy: -14415.503777

|   |              |              |              |
|---|--------------|--------------|--------------|
| C | 5.726500000  | -2.889200000 | -2.160200000 |
| C | -5.638900000 | -2.885101000 | -2.451399000 |
| C | 4.388901000  | -3.187701000 | -2.460000000 |
| C | -4.293000000 | -3.161899000 | -2.734602000 |
| C | 4.106398000  | -4.252600000 | -3.328502000 |
| C | -3.986000000 | -4.236300000 | -3.582700000 |
| C | 5.138201000  | -5.020698000 | -3.859400000 |
| C | -4.998200000 | -5.035200000 | -4.107601000 |
| C | 6.482800000  | -4.751200000 | -3.537700000 |
| C | -6.351100000 | -4.782200000 | -3.807101000 |
| C | 6.755800000  | -3.657500000 | -2.694900000 |
| C | -6.649700000 | -3.679700000 | -2.983400000 |
| C | 5.673400000  | 2.762000000  | -2.369400000 |
| C | -5.668800000 | 2.628902000  | -2.684597000 |
| C | 4.341400000  | 3.021298000  | -2.724803000 |
| C | -4.324801000 | 2.872001000  | -3.008000000 |

|   |              |              |              |
|---|--------------|--------------|--------------|
| C | 4.069899000  | 4.017800000  | -3.673300000 |
| C | -4.019398000 | 3.907100000  | -3.904901000 |
| C | 5.105900000  | 4.760700000  | -4.231200000 |
| C | -5.033001000 | 4.692698000  | -4.448901000 |
| C | 6.444700000  | 4.526400000  | -3.861700000 |
| C | -6.384200000 | 4.462598000  | -4.123403000 |
| C | 6.708200000  | 3.500400000  | -2.934600000 |
| C | -6.680500000 | 3.408600000  | -3.237600000 |
| C | -3.223395000 | -2.332286000 | -2.105808000 |
| C | -3.315199000 | -2.089495000 | 2.441202000  |
| C | -3.322904000 | 2.330108000  | 2.211494000  |
| C | 3.188500000  | 2.437001000  | 2.193694000  |
| C | 3.241996000  | 2.241993000  | -2.086004000 |
| C | 3.280300000  | -2.402406000 | -1.851693000 |
| C | -3.245500000 | 2.084796000  | -2.346712000 |
| C | 3.174603000  | -2.211104000 | 2.426596000  |
| H | 5.937000000  | -2.056700000 | -1.495800000 |
| H | -5.871700000 | -2.048200000 | -1.800500000 |
| H | 4.900900000  | -5.847201000 | -4.524399000 |
| H | -4.737200000 | -5.873101000 | -4.748999000 |
| H | 7.786000000  | -3.416500000 | -2.445100000 |
| H | -7.686200000 | -3.452500000 | -2.747200000 |
| H | 5.874800000  | 1.981600000  | -1.642500000 |
| H | -5.899000000 | 1.830200000  | -1.986300000 |
| H | 4.876900000  | 5.534100000  | -4.959800000 |
| H | -4.774300000 | 5.498302000  | -5.131197000 |
| H | 7.734600000  | 3.290500000  | -2.644500000 |
| H | -7.714900000 | 3.205600000  | -2.972200000 |
| H | -7.139900000 | -5.409200000 | -4.210200000 |
| H | 7.286100000  | -5.356800000 | -3.944800000 |
| H | -7.172900000 | 5.077500000  | -4.544800000 |
| H | 7.252000000  | 5.109100000  | -4.293600000 |
| H | -4.101094000 | -2.666618000 | 2.881887000  |
| H | 3.964843000  | 3.004751000  | 2.662582000  |
| H | -4.111859000 | 2.914441000  | 2.636929000  |
| H | 3.948377000  | -2.768397000 | 2.911976000  |
| O | -3.663737000 | 1.472099000  | 1.337384000  |
| O | -3.609988000 | 1.255406000  | -1.456701000 |
| O | -3.654004000 | -1.258599000 | 1.542896000  |
| O | -2.127282000 | -2.310232000 | 2.835706000  |
| O | 1.970307000  | -2.521843000 | 2.683591000  |
| O | 2.090039000  | -2.742561000 | -2.140628000 |
| O | 3.548214000  | -1.286096000 | 1.640805000  |
| O | 3.614183000  | -1.448424000 | -1.083686000 |
| O | 3.557201000  | 1.485682000  | 1.438499000  |
| O | 3.591764000  | 1.320306000  | -1.285291000 |
| O | 2.046372000  | 2.547621000  | -2.386366000 |
| O | 1.986495000  | 2.771332000  | 2.435669000  |
| O | -2.020186000 | -2.554256000 | -2.444701000 |
| O | -3.603963000 | -1.474712000 | -1.248397000 |
| O | -2.134302000 | 2.562461000  | 2.592292000  |
| O | -2.045114000 | 2.316507000  | -2.694236000 |
| H | -1.959422000 | -2.858525000 | 0.224442000  |
| H | -1.027354000 | 1.823044000  | 4.290461000  |
| H | -0.133717000 | 0.517462000  | 4.137752000  |
| H | -0.284869000 | 1.616914000  | -4.730197000 |

|    |              |              |              |
|----|--------------|--------------|--------------|
| H  | 0.015710000  | 4.081191000  | -0.419814000 |
| H  | 0.651045000  | 4.478603000  | 1.620236000  |
| H  | 0.843927000  | 4.269715000  | -1.771844000 |
| H  | 1.869484000  | 0.166778000  | 2.977670000  |
| H  | -1.956518000 | 2.892808000  | -0.099108000 |
| H  | -0.811756000 | -1.486254000 | 4.551221000  |
| H  | 0.386301000  | -2.506055000 | -4.416365000 |
| H  | 0.845725000  | -4.195741000 | 1.941727000  |
| H  | 0.679071000  | -4.484058000 | -1.408581000 |
| H  | 0.005356000  | -4.031616000 | 0.602169000  |
| O  | -1.118064000 | 0.120506000  | 1.537571000  |
| O  | -0.007872000 | -3.889856000 | 1.609565000  |
| O  | 1.031822000  | 1.498627000  | 0.004215000  |
| O  | 1.316307000  | 0.156606000  | 2.189206000  |
| O  | -0.076063000 | -1.087193000 | 4.074930000  |
| O  | -0.153645000 | 1.526191000  | 4.005239000  |
| O  | 0.198867000  | -1.782695000 | -3.807356000 |
| O  | 1.039094000  | -1.456666000 | 0.203089000  |
| O  | -1.419280000 | -2.060775000 | 0.220895000  |
| O  | -0.027409000 | -3.971358000 | -0.999822000 |
| O  | -0.073960000 | 3.994219000  | 1.211142000  |
| O  | 0.009170000  | 3.929670000  | -1.420333000 |
| O  | -1.423742000 | 2.090870000  | -0.059591000 |
| O  | 0.201627000  | 1.298710000  | -3.964917000 |
| O  | 1.338223000  | -0.109552000 | -2.079203000 |
| O  | -1.097471000 | -0.089863000 | -1.425538000 |
| Zr | 2.470649000  | 0.006404000  | 0.121760000  |
| Zr | -0.085080000 | -1.617759000 | 2.034292000  |
| Zr | -0.040684000 | 1.958570000  | 1.741451000  |
| Zr | -0.036126000 | 1.648388000  | -1.805942000 |
| Zr | -2.551728000 | -0.002431000 | 0.046215000  |
| Zr | 0.005332000  | -1.943205000 | -1.560547000 |
| Fe | 1.304865000  | -0.273033000 | -3.931038000 |
| O  | 2.071603000  | -0.445243000 | -5.352979000 |
| Br | -2.300426000 | 4.418256000  | -4.559096000 |
| Br | 2.362672000  | 4.551689000  | -4.345590000 |
| Br | 2.399257000  | -4.854926000 | -3.951759000 |
| Br | -2.256694000 | -4.810441000 | -4.147746000 |

Fe-NU-1000-Br (Ads\_4)

Free Energy: -14570.331083

Electronic Energy: -14570.5634629

|   |              |              |              |
|---|--------------|--------------|--------------|
| C | 5.726500000  | -2.889200000 | -2.160200000 |
| C | -5.638900000 | -2.885100000 | -2.451400000 |
| C | 4.388900000  | -3.187700000 | -2.460000000 |
| C | -4.293000000 | -3.161900000 | -2.734600000 |
| C | 4.106400000  | -4.252600000 | -3.328500000 |
| C | -3.986000000 | -4.236300000 | -3.582700000 |
| C | 5.138200000  | -5.020700000 | -3.859400000 |
| C | -4.998200000 | -5.035200000 | -4.107600000 |
| C | 6.482800000  | -4.751200000 | -3.537700000 |
| C | -6.351100000 | -4.782200000 | -3.807100000 |
| C | 6.755800000  | -3.657500000 | -2.694900000 |
| C | -6.649700000 | -3.679700000 | -2.983400000 |
| C | 5.673400000  | 2.762000000  | -2.369400000 |
| C | -5.668800000 | 2.628900000  | -2.684600000 |

|   |              |              |              |
|---|--------------|--------------|--------------|
| C | 4.341400000  | 3.021300000  | -2.724800000 |
| C | -4.324800000 | 2.872000000  | -3.008000000 |
| C | 4.069900000  | 4.017800000  | -3.673300000 |
| C | -4.019400000 | 3.907100000  | -3.904900000 |
| C | 5.105900000  | 4.760700000  | -4.231200000 |
| C | -5.033000000 | 4.692700000  | -4.448900000 |
| C | 6.444700000  | 4.526400000  | -3.861700000 |
| C | -6.384200000 | 4.462600000  | -4.123400000 |
| C | 6.708200000  | 3.500400000  | -2.934600000 |
| C | -6.680500000 | 3.408600000  | -3.237600000 |
| C | -3.223400000 | -2.332300000 | -2.105800000 |
| C | -3.315200000 | -2.089500000 | 2.441200000  |
| C | -3.322900000 | 2.330100000  | 2.211500000  |
| C | 3.188500000  | 2.437000000  | 2.193700000  |
| C | 3.242000000  | 2.242000000  | -2.086000000 |
| C | 3.280300000  | -2.402400000 | -1.851700000 |
| C | -3.245500000 | 2.084800000  | -2.346700000 |
| C | 3.174600000  | -2.211100000 | 2.426600000  |
| H | 5.937000000  | -2.056700000 | -1.495800000 |
| H | -5.871700000 | -2.048200000 | -1.800500000 |
| H | 4.900900000  | -5.847200000 | -4.524400000 |
| H | -4.737200000 | -5.873100000 | -4.749000000 |
| H | 7.786000000  | -3.416500000 | -2.445100000 |
| H | -7.686200000 | -3.452500000 | -2.747200000 |
| H | 5.874800000  | 1.981600000  | -1.642500000 |
| H | -5.899000000 | 1.830200000  | -1.986300000 |
| H | 4.876900000  | 5.534100000  | -4.959800000 |
| H | -4.774300000 | 5.498300000  | -5.131200000 |
| H | 7.734600000  | 3.290500000  | -2.644500000 |
| H | -7.714900000 | 3.205600000  | -2.972200000 |
| H | -7.139900000 | -5.409200000 | -4.210200000 |
| H | 7.286100000  | -5.356800000 | -3.944800000 |
| H | -7.172900000 | 5.077500000  | -4.544800000 |
| H | 7.252000000  | 5.109100000  | -4.293600000 |
| H | -4.101094000 | -2.666618000 | 2.881887000  |
| H | 3.964843000  | 3.004750000  | 2.662583000  |
| H | -4.111859000 | 2.914440000  | 2.636930000  |
| H | 3.948377000  | -2.768397000 | 2.911976000  |
| O | -3.663700000 | 1.472100000  | 1.337400000  |
| O | -3.610000000 | 1.255400000  | -1.456700000 |
| O | -3.654000000 | -1.258600000 | 1.542900000  |
| O | -2.127300000 | -2.310200000 | 2.835700000  |
| O | 1.970300000  | -2.521800000 | 2.683600000  |
| O | 2.090000000  | -2.742700000 | -2.140600000 |
| O | 3.548200000  | -1.286100000 | 1.640800000  |
| O | 3.614200000  | -1.448400000 | -1.083700000 |
| O | 3.557200000  | 1.485700000  | 1.438500000  |
| O | 3.591800000  | 1.320300000  | -1.285300000 |
| O | 2.046400000  | 2.547800000  | -2.386400000 |
| O | 1.986500000  | 2.771300000  | 2.435700000  |
| O | -2.020200000 | -2.554500000 | -2.444700000 |
| O | -3.604000000 | -1.474700000 | -1.248400000 |
| O | -2.134300000 | 2.562400000  | 2.592300000  |
| O | -2.045100000 | 2.316700000  | -2.694300000 |
| H | -1.948982000 | -2.861123000 | 0.226858000  |
| H | -1.035447000 | 1.816679000  | 4.275902000  |

|    |              |              |              |
|----|--------------|--------------|--------------|
| H  | -0.135117000 | 0.515456000  | 4.132533000  |
| H  | -0.363283000 | 1.623514000  | -4.716617000 |
| H  | 0.013883000  | 4.065064000  | -0.432225000 |
| H  | 0.654966000  | 4.471803000  | 1.617135000  |
| H  | 0.848270000  | 4.246048000  | -1.774043000 |
| H  | 1.869181000  | 0.166338000  | 2.979830000  |
| H  | -1.947867000 | 2.888368000  | -0.101473000 |
| H  | -0.816274000 | -1.488284000 | 4.543125000  |
| H  | -0.462687000 | -2.193218000 | -4.413165000 |
| H  | 0.850988000  | -4.191289000 | 1.927686000  |
| H  | 0.655377000  | -4.481692000 | -1.422369000 |
| H  | 0.011883000  | -4.021190000 | 0.582685000  |
| O  | -1.118928000 | 0.119581000  | 1.543380000  |
| O  | -0.002794000 | -3.885869000 | 1.596352000  |
| O  | 1.038853000  | 1.490270000  | 0.000187000  |
| O  | 1.318415000  | 0.155715000  | 2.189917000  |
| O  | -0.075506000 | -1.091597000 | 4.072841000  |
| O  | -0.156223000 | 1.524413000  | 4.002709000  |
| O  | 0.171407000  | -1.870380000 | -3.765583000 |
| O  | 1.043708000  | -1.446632000 | 0.198399000  |
| O  | -1.419298000 | -2.056602000 | 0.222736000  |
| O  | -0.033953000 | -3.962309000 | -0.995145000 |
| O  | -0.073783000 | 3.990737000  | 1.211064000  |
| O  | 0.008292000  | 3.913551000  | -1.430282000 |
| O  | -1.421642000 | 2.082676000  | -0.056157000 |
| O  | 0.186683000  | 1.371792000  | -3.968930000 |
| O  | 1.271178000  | -0.114483000 | -2.165169000 |
| O  | -1.132955000 | -0.095524000 | -1.423482000 |
| Zr | 2.468926000  | 0.001034000  | 0.116303000  |
| Zr | -0.082728000 | -1.618057000 | 2.028816000  |
| Zr | -0.038079000 | 1.954142000  | 1.735318000  |
| Zr | -0.035037000 | 1.612688000  | -1.812967000 |
| Zr | -2.555358000 | -0.000890000 | 0.052444000  |
| Zr | 0.001868000  | -1.924310000 | -1.572386000 |
| Br | -2.300484000 | 4.416907000  | -4.559120000 |
| Br | 2.366435000  | 4.513639000  | -4.379804000 |
| Br | 2.401023000  | -4.789758000 | -4.006711000 |
| Br | -2.256626000 | -4.800775000 | -4.160698000 |
| Fe | 1.155537000  | -0.273205000 | -4.115148000 |
| O  | 1.094876000  | -0.339206000 | -5.751093000 |
| C  | 3.984109000  | 0.205162000  | -4.912785000 |
| C  | 5.453848000  | 0.025231000  | -4.647858000 |
| H  | 3.717468000  | 0.141565000  | -5.972744000 |
| H  | 3.621436000  | 1.172531000  | -4.547754000 |
| H  | 5.657441000  | 0.085219000  | -3.574885000 |
| H  | 5.811505000  | -0.944845000 | -5.009596000 |
| H  | 6.026026000  | 0.811190000  | -5.149853000 |
| O  | 3.217881000  | -0.782977000 | -4.172716000 |
| H  | 3.237897000  | -1.614249000 | -4.670479000 |

Fe-NU-1000-Br (TS1\_4)

Free Energy: -14570.314732

Electronic Energy: -14570.5422833

|   |              |              |              |
|---|--------------|--------------|--------------|
| C | 5.726500000  | -2.889200000 | -2.160200000 |
| C | -5.638900000 | -2.885100000 | -2.451400000 |
| C | 4.388900000  | -3.187700000 | -2.460000000 |

|   |              |              |              |
|---|--------------|--------------|--------------|
| C | -4.293000000 | -3.161900000 | -2.734600000 |
| C | 4.106400000  | -4.252600000 | -3.328500000 |
| C | -3.986000000 | -4.236300000 | -3.582700000 |
| C | 5.138200000  | -5.020700000 | -3.859400000 |
| C | -4.998200000 | -5.035200000 | -4.107600000 |
| C | 6.482800000  | -4.751200000 | -3.537700000 |
| C | -6.351100000 | -4.782200000 | -3.807100000 |
| C | 6.755800000  | -3.657500000 | -2.694900000 |
| C | -6.649700000 | -3.679700000 | -2.983400000 |
| C | 5.673400000  | 2.762000000  | -2.369400000 |
| C | -5.668800000 | 2.628900000  | -2.684600000 |
| C | 4.341400000  | 3.021300000  | -2.724800000 |
| C | -4.324800000 | 2.872000000  | -3.008000000 |
| C | 4.069900000  | 4.017800000  | -3.673300000 |
| C | -4.019400000 | 3.907100000  | -3.904900000 |
| C | 5.105900000  | 4.760700000  | -4.231200000 |
| C | -5.033000000 | 4.692700000  | -4.448900000 |
| C | 6.444700000  | 4.526400000  | -3.861700000 |
| C | -6.384200000 | 4.462600000  | -4.123400000 |
| C | 6.708200000  | 3.500400000  | -2.934600000 |
| C | -6.680500000 | 3.408600000  | -3.237600000 |
| C | -3.223400000 | -2.332300000 | -2.105800000 |
| C | -3.315200000 | -2.089500000 | 2.441200000  |
| C | -3.322900000 | 2.330100000  | 2.211500000  |
| C | 3.188500000  | 2.437000000  | 2.193700000  |
| C | 3.242000000  | 2.242000000  | -2.086000000 |
| C | 3.280300000  | -2.402400000 | -1.851700000 |
| C | -3.245500000 | 2.084800000  | -2.346700000 |
| C | 3.174600000  | -2.211100000 | 2.426600000  |
| H | 5.937000000  | -2.056700000 | -1.495800000 |
| H | -5.871700000 | -2.048200000 | -1.800500000 |
| H | 4.900900000  | -5.847200000 | -4.524400000 |
| H | -4.737200000 | -5.873100000 | -4.749000000 |
| H | 7.786000000  | -3.416500000 | -2.445100000 |
| H | -7.686200000 | -3.452500000 | -2.747200000 |
| H | 5.874800000  | 1.981600000  | -1.642500000 |
| H | -5.899000000 | 1.830200000  | -1.986300000 |
| H | 4.876900000  | 5.534100000  | -4.959800000 |
| H | -4.774300000 | 5.498300000  | -5.131200000 |
| H | 7.734600000  | 3.290500000  | -2.644500000 |
| H | -7.714900000 | 3.205600000  | -2.972200000 |
| H | -7.139900000 | -5.409200000 | -4.210200000 |
| H | 7.286100000  | -5.356800000 | -3.944800000 |
| H | -7.172900000 | 5.077500000  | -4.544800000 |
| H | 7.252000000  | 5.109100000  | -4.293600000 |
| H | -4.101094000 | -2.666618000 | 2.881887000  |
| H | 3.964843000  | 3.004750000  | 2.662583000  |
| H | -4.111859000 | 2.914440000  | 2.636930000  |
| H | 3.948377000  | -2.768397000 | 2.911976000  |
| O | -3.663700000 | 1.472100000  | 1.337400000  |
| O | -3.610000000 | 1.255400000  | -1.456700000 |
| O | -3.654000000 | -1.258600000 | 1.542900000  |
| O | -2.127300000 | -2.310200000 | 2.835700000  |
| O | 1.970300000  | -2.521800000 | 2.683600000  |
| O | 2.090000000  | -2.742700000 | -2.140600000 |
| O | 3.548200000  | -1.286100000 | 1.640800000  |

|    |              |              |              |
|----|--------------|--------------|--------------|
| O  | 3.614200000  | -1.448400000 | -1.083700000 |
| O  | 3.557200000  | 1.485700000  | 1.438500000  |
| O  | 3.591800000  | 1.320300000  | -1.285300000 |
| O  | 2.046400000  | 2.547800000  | -2.386400000 |
| O  | 1.986500000  | 2.771300000  | 2.435700000  |
| O  | -2.020200000 | -2.554500000 | -2.444700000 |
| O  | -3.604000000 | -1.474700000 | -1.248400000 |
| O  | -2.134300000 | 2.562400000  | 2.592300000  |
| O  | -2.045100000 | 2.316700000  | -2.694300000 |
| H  | -1.947795000 | -2.855917000 | 0.221194000  |
| H  | -1.029966000 | 1.821426000  | 4.273923000  |
| H  | -0.136596000 | 0.515289000  | 4.126848000  |
| H  | -0.484288000 | 1.670887000  | -4.654401000 |
| H  | 0.023981000  | 4.088028000  | -0.425449000 |
| H  | 0.655326000  | 4.475494000  | 1.623351000  |
| H  | 0.842797000  | 4.273489000  | -1.784021000 |
| H  | 1.862988000  | 0.164026000  | 2.985061000  |
| H  | -1.949024000 | 2.897473000  | -0.092773000 |
| H  | -0.814433000 | -1.491133000 | 4.532341000  |
| H  | -0.411770000 | -2.115721000 | -4.473217000 |
| H  | 0.849190000  | -4.196055000 | 1.924161000  |
| H  | 0.629240000  | -4.498102000 | -1.441708000 |
| H  | 0.011864000  | -4.024100000 | 0.578205000  |
| O  | -1.117513000 | 0.122179000  | 1.539038000  |
| O  | 0.000240000  | -3.881684000 | 1.588988000  |
| O  | 1.042889000  | 1.478262000  | -0.005974000 |
| O  | 1.321614000  | 0.155180000  | 2.188457000  |
| O  | -0.075610000 | -1.091363000 | 4.061446000  |
| O  | -0.153627000 | 1.524175000  | 3.996523000  |
| O  | 0.168156000  | -1.793609000 | -3.776250000 |
| O  | 1.045527000  | -1.427012000 | 0.174212000  |
| O  | -1.413842000 | -2.054013000 | 0.214145000  |
| O  | -0.041815000 | -3.962986000 | -1.003961000 |
| O  | -0.065999000 | 3.990722000  | 1.208434000  |
| O  | 0.010247000  | 3.936070000  | -1.424519000 |
| O  | -1.419235000 | 2.093318000  | -0.059127000 |
| O  | 0.124253000  | 1.429202000  | -3.949778000 |
| O  | 1.314498000  | -0.103497000 | -2.236483000 |
| O  | -1.093014000 | -0.084958000 | -1.420365000 |
| Zr | 2.489981000  | 0.010130000  | 0.128415000  |
| Zr | -0.080394000 | -1.615099000 | 2.019028000  |
| Zr | -0.035338000 | 1.954179000  | 1.731871000  |
| Zr | -0.033489000 | 1.655251000  | -1.814370000 |
| Zr | -2.547417000 | 0.000178000  | 0.045484000  |
| Zr | 0.006219000  | -1.935448000 | -1.586620000 |
| Br | -2.301306000 | 4.411796000  | -4.563615000 |
| Br | 2.363452000  | 4.523947000  | -4.364643000 |
| Br | 2.401925000  | -4.802649000 | -3.992093000 |
| Br | -2.256759000 | -4.800045000 | -4.161596000 |
| Fe | 1.157510000  | -0.202415000 | -4.095386000 |
| O  | 1.068868000  | -0.282428000 | -5.811136000 |
| C  | 4.034720000  | -0.656181000 | -4.807797000 |
| C  | 5.229408000  | -0.196220000 | -4.015288000 |
| H  | 3.646066000  | -1.612667000 | -4.421313000 |
| H  | 4.309455000  | -0.842388000 | -5.855894000 |
| H  | 5.600608000  | 0.754477000  | -4.409364000 |



|   |             |              |              |
|---|-------------|--------------|--------------|
| H | 4.962314000 | -0.052383000 | -2.963081000 |
| H | 6.035314000 | -0.934209000 | -4.075034000 |
| O | 3.011678000 | 0.340440000  | -4.782831000 |
| H | 2.210827000 | 0.123973000  | -5.685534000 |

Fe-NU-1000-Br (Int\_4)

Free Energy: -14570.34715

Electronic Energy: -14570.579847

|   |              |              |              |
|---|--------------|--------------|--------------|
| C | 5.726500000  | -2.889200000 | -2.160200000 |
| C | -5.638900000 | -2.885100000 | -2.451400000 |
| C | 4.388900000  | -3.187700000 | -2.460000000 |
| C | -4.293000000 | -3.161900000 | -2.734600000 |
| C | 4.106400000  | -4.252600000 | -3.328500000 |
| C | -3.986000000 | -4.236300000 | -3.582700000 |
| C | 5.138200000  | -5.020700000 | -3.859400000 |
| C | -4.998200000 | -5.035200000 | -4.107600000 |
| C | 6.482800000  | -4.751200000 | -3.537700000 |
| C | -6.351100000 | -4.782200000 | -3.807100000 |
| C | 6.755800000  | -3.657500000 | -2.694900000 |
| C | -6.649700000 | -3.679700000 | -2.983400000 |
| C | 5.673400000  | 2.762000000  | -2.369400000 |
| C | -5.668800000 | 2.628900000  | -2.684600000 |
| C | 4.341400000  | 3.021300000  | -2.724800000 |
| C | -4.324800000 | 2.872000000  | -3.008000000 |
| C | 4.069900000  | 4.017800000  | -3.673300000 |
| C | -4.019400000 | 3.907100000  | -3.904900000 |
| C | 5.105900000  | 4.760700000  | -4.231200000 |
| C | -5.033000000 | 4.692700000  | -4.448900000 |
| C | 6.444700000  | 4.526400000  | -3.861700000 |
| C | -6.384200000 | 4.462600000  | -4.123400000 |
| C | 6.708200000  | 3.500400000  | -2.934600000 |
| C | -6.680500000 | 3.408600000  | -3.237600000 |
| C | -3.223400000 | -2.332300000 | -2.105800000 |
| C | -3.315200000 | -2.089500000 | 2.441200000  |
| C | -3.322900000 | 2.330100000  | 2.211500000  |
| C | 3.188500000  | 2.437000000  | 2.193700000  |
| C | 3.242000000  | 2.242000000  | -2.086000000 |
| C | 3.280300000  | -2.402400000 | -1.851700000 |
| C | -3.245500000 | 2.084800000  | -2.346700000 |
| C | 3.174600000  | -2.211100000 | 2.426600000  |
| H | 5.937000000  | -2.056700000 | -1.495800000 |
| H | -5.871700000 | -2.048200000 | -1.800500000 |
| H | 4.900900000  | -5.847200000 | -4.524400000 |
| H | -4.737200000 | -5.873100000 | -4.749000000 |
| H | 7.786000000  | -3.416500000 | -2.445100000 |
| H | -7.686200000 | -3.452500000 | -2.747200000 |
| H | 5.874800000  | 1.981600000  | -1.642500000 |
| H | -5.899000000 | 1.830200000  | -1.986300000 |
| H | 4.876900000  | 5.534100000  | -4.959800000 |
| H | -4.774300000 | 5.498300000  | -5.131200000 |
| H | 7.734600000  | 3.290500000  | -2.644500000 |
| H | -7.714900000 | 3.205600000  | -2.972200000 |
| H | -7.139900000 | -5.409200000 | -4.210200000 |
| H | 7.286100000  | -5.356800000 | -3.944800000 |
| H | -7.172900000 | 5.077500000  | -4.544800000 |
| H | 7.252000000  | 5.109100000  | -4.293600000 |

|    |              |              |              |
|----|--------------|--------------|--------------|
| H  | -4.101094000 | -2.666618000 | 2.881887000  |
| H  | 3.964843000  | 3.004750000  | 2.662583000  |
| H  | -4.111859000 | 2.914440000  | 2.636930000  |
| H  | 3.948377000  | -2.768397000 | 2.911976000  |
| O  | -3.663700000 | 1.472100000  | 1.337400000  |
| O  | -3.610000000 | 1.255400000  | -1.456700000 |
| O  | -3.654000000 | -1.258600000 | 1.542900000  |
| O  | -2.127300000 | -2.310200000 | 2.835700000  |
| O  | 1.970300000  | -2.521800000 | 2.683600000  |
| O  | 2.090000000  | -2.742700000 | -2.140600000 |
| O  | 3.548200000  | -1.286100000 | 1.640800000  |
| O  | 3.614200000  | -1.448400000 | -1.083700000 |
| O  | 3.557200000  | 1.485700000  | 1.438500000  |
| O  | 3.591800000  | 1.320300000  | -1.285300000 |
| O  | 2.046400000  | 2.547800000  | -2.386400000 |
| O  | 1.986500000  | 2.771300000  | 2.435700000  |
| O  | -2.020200000 | -2.554500000 | -2.444700000 |
| O  | -3.604000000 | -1.474700000 | -1.248400000 |
| O  | -2.134300000 | 2.562400000  | 2.592300000  |
| O  | -2.045100000 | 2.316700000  | -2.694300000 |
| H  | -1.961844000 | -2.853544000 | 0.228227000  |
| H  | -1.030933000 | 1.826017000  | 4.272710000  |
| H  | -0.134089000 | 0.522745000  | 4.130429000  |
| H  | -0.422187000 | 1.401539000  | -4.633235000 |
| H  | 0.017287000  | 4.077449000  | -0.431192000 |
| H  | 0.654798000  | 4.477192000  | 1.613626000  |
| H  | 0.847772000  | 4.259654000  | -1.781183000 |
| H  | 1.865597000  | 0.170601000  | 2.980263000  |
| H  | -1.954451000 | 2.894079000  | -0.096207000 |
| H  | -0.813710000 | -1.483778000 | 4.543035000  |
| H  | 0.514847000  | -2.548857000 | -4.207772000 |
| H  | 0.848907000  | -4.190513000 | 1.928778000  |
| H  | 0.682897000  | -4.471037000 | -1.407192000 |
| H  | 0.004781000  | -4.022335000 | 0.590165000  |
| O  | -1.119585000 | 0.122345000  | 1.540312000  |
| O  | -0.005886000 | -3.885236000 | 1.599491000  |
| O  | 1.033981000  | 1.484980000  | -0.007100000 |
| O  | 1.318795000  | 0.158247000  | 2.187504000  |
| O  | -0.074723000 | -1.086284000 | 4.070547000  |
| O  | -0.153259000 | 1.530724000  | 3.997598000  |
| O  | 0.192349000  | -1.748555000 | -3.770938000 |
| O  | 1.043111000  | -1.445693000 | 0.196165000  |
| O  | -1.422450000 | -2.055540000 | 0.223335000  |
| O  | -0.031457000 | -3.963523000 | -1.006931000 |
| O  | -0.069622000 | 3.993024000  | 1.203415000  |
| O  | 0.008992000  | 3.927848000  | -1.431140000 |
| O  | -1.422532000 | 2.091426000  | -0.063066000 |
| O  | 0.221407000  | 1.266494000  | -3.932940000 |
| O  | 1.342524000  | -0.119525000 | -2.099429000 |
| O  | -1.099271000 | -0.085318000 | -1.422167000 |
| Zr | 2.482467000  | 0.012161000  | 0.120225000  |
| Zr | -0.082707000 | -1.613872000 | 2.028708000  |
| Zr | -0.037283000 | 1.956428000  | 1.729258000  |
| Zr | -0.033037000 | 1.648571000  | -1.828295000 |
| Zr | -2.550053000 | 0.000315000  | 0.047277000  |
| Zr | -0.002338000 | -1.926795000 | -1.564069000 |

|    |              |              |              |
|----|--------------|--------------|--------------|
| Br | -2.302245000 | 4.411346000  | -4.563668000 |
| Br | 2.364270000  | 4.514400000  | -4.374887000 |
| Br | 2.401740000  | -4.812999000 | -3.998830000 |
| Br | -2.256755000 | -4.805257000 | -4.153935000 |
| Fe | 1.499500000  | -0.281329000 | -3.931702000 |
| O  | 1.494682000  | -0.601310000 | -5.712748000 |
| C  | 4.131043000  | -0.438901000 | -4.926773000 |
| C  | 5.506990000  | 0.154397000  | -4.709363000 |
| H  | 4.158411000  | -1.533493000 | -4.785960000 |
| H  | 3.774566000  | -0.260435000 | -5.951010000 |
| H  | 5.508970000  | 1.227401000  | -4.921265000 |
| H  | 5.825224000  | 0.015059000  | -3.671597000 |
| H  | 6.233986000  | -0.332987000 | -5.366354000 |
| O  | 3.245000000  | 0.145393000  | -4.002888000 |
| H  | 0.636944000  | -0.992291000 | -5.932182000 |

Fe-NU-1000-Br (TS2\_4)

Free Energy: -14570.333624

Electronic Energy: -14570.5575419

|   |              |              |              |
|---|--------------|--------------|--------------|
| C | 5.726500000  | -2.889200000 | -2.160200000 |
| C | -5.638900000 | -2.885100000 | -2.451400000 |
| C | 4.388900000  | -3.187700000 | -2.460000000 |
| C | -4.293000000 | -3.161900000 | -2.734600000 |
| C | 4.106400000  | -4.252600000 | -3.328500000 |
| C | -3.986000000 | -4.236300000 | -3.582700000 |
| C | 5.138200000  | -5.020700000 | -3.859400000 |
| C | -4.998200000 | -5.035200000 | -4.107600000 |
| C | 6.482800000  | -4.751200000 | -3.537700000 |
| C | -6.351100000 | -4.782200000 | -3.807100000 |
| C | 6.755800000  | -3.657500000 | -2.694900000 |
| C | -6.649700000 | -3.679700000 | -2.983400000 |
| C | 5.673400000  | 2.762000000  | -2.369400000 |
| C | -5.668800000 | 2.628900000  | -2.684600000 |
| C | 4.341400000  | 3.021300000  | -2.724800000 |
| C | -4.324800000 | 2.872000000  | -3.008000000 |
| C | 4.069900000  | 4.017800000  | -3.673300000 |
| C | -4.019400000 | 3.907100000  | -3.904900000 |
| C | 5.105900000  | 4.760700000  | -4.231200000 |
| C | -5.033000000 | 4.692700000  | -4.448900000 |
| C | 6.444700000  | 4.526400000  | -3.861700000 |
| C | -6.384200000 | 4.462600000  | -4.123400000 |
| C | 6.708200000  | 3.500400000  | -2.934600000 |
| C | -6.680500000 | 3.408600000  | -3.237600000 |
| C | -3.223400000 | -2.332300000 | -2.105800000 |
| C | -3.315200000 | -2.089500000 | 2.441200000  |
| C | -3.322900000 | 2.330100000  | 2.211500000  |
| C | 3.188500000  | 2.437000000  | 2.193700000  |
| C | 3.242000000  | 2.242000000  | -2.086000000 |
| C | 3.280300000  | -2.402400000 | -1.851700000 |
| C | -3.245500000 | 2.084800000  | -2.346700000 |
| C | 3.174600000  | -2.211100000 | 2.426600000  |
| H | 5.937000000  | -2.056700000 | -1.495800000 |
| H | -5.871700000 | -2.048200000 | -1.800500000 |
| H | 4.900900000  | -5.847200000 | -4.524400000 |
| H | -4.737200000 | -5.873100000 | -4.749000000 |
| H | 7.786000000  | -3.416500000 | -2.445100000 |

|   |              |              |              |
|---|--------------|--------------|--------------|
| H | -7.686200000 | -3.452500000 | -2.747200000 |
| H | 5.874800000  | 1.981600000  | -1.642500000 |
| H | -5.899000000 | 1.830200000  | -1.986300000 |
| H | 4.876900000  | 5.534100000  | -4.959800000 |
| H | -4.774300000 | 5.498300000  | -5.131200000 |
| H | 7.734600000  | 3.290500000  | -2.644500000 |
| H | -7.714900000 | 3.205600000  | -2.972200000 |
| H | -7.139900000 | -5.409200000 | -4.210200000 |
| H | 7.286100000  | -5.356800000 | -3.944800000 |
| H | -7.172900000 | 5.077500000  | -4.544800000 |
| H | 7.252000000  | 5.109100000  | -4.293600000 |
| H | -4.101094000 | -2.666618000 | 2.881887000  |
| H | 3.964843000  | 3.004750000  | 2.662583000  |
| H | -4.111859000 | 2.914440000  | 2.636930000  |
| H | 3.948377000  | -2.768397000 | 2.911976000  |
| O | -3.663700000 | 1.472100000  | 1.337400000  |
| O | -3.610000000 | 1.255400000  | -1.456700000 |
| O | -3.654000000 | -1.258600000 | 1.542900000  |
| O | -2.127300000 | -2.310200000 | 2.835700000  |
| O | 1.970300000  | -2.521800000 | 2.683600000  |
| O | 2.090000000  | -2.742700000 | -2.140600000 |
| O | 3.548200000  | -1.286100000 | 1.640800000  |
| O | 3.614200000  | -1.448400000 | -1.083700000 |
| O | 3.557200000  | 1.485700000  | 1.438500000  |
| O | 3.591800000  | 1.320300000  | -1.285300000 |
| O | 2.046400000  | 2.547800000  | -2.386400000 |
| O | 1.986500000  | 2.771300000  | 2.435700000  |
| O | -2.020200000 | -2.554500000 | -2.444700000 |
| O | -3.604000000 | -1.474700000 | -1.248400000 |
| O | -2.134300000 | 2.562400000  | 2.592300000  |
| O | -2.045100000 | 2.316700000  | -2.694300000 |
| H | -1.957031000 | -2.858228000 | 0.234953000  |
| H | -1.035791000 | 1.819209000  | 4.286796000  |
| H | -0.133775000 | 0.519434000  | 4.141335000  |
| H | -0.492553000 | 1.431043000  | -4.594156000 |
| H | 0.012725000  | 4.073893000  | -0.422580000 |
| H | 0.653298000  | 4.478300000  | 1.618551000  |
| H | 0.848795000  | 4.251376000  | -1.768238000 |
| H | 1.872991000  | 0.171317000  | 2.981319000  |
| H | -1.954565000 | 2.890548000  | -0.098967000 |
| H | -0.815082000 | -1.484413000 | 4.553694000  |
| H | -0.671874000 | -1.835003000 | -4.188567000 |
| H | 0.851167000  | -4.183892000 | 1.954917000  |
| H | 0.589146000  | -4.539357000 | -1.419657000 |
| H | 0.002292000  | -4.037546000 | 0.617700000  |
| O | -1.118138000 | 0.122831000  | 1.546392000  |
| O | -0.009101000 | -3.891875000 | 1.627174000  |
| O | 1.034589000  | 1.507329000  | 0.012101000  |
| O | 1.316207000  | 0.159664000  | 2.195673000  |
| O | -0.075197000 | -1.086752000 | 4.082831000  |
| O | -0.157022000 | 1.528429000  | 4.011047000  |
| O | 0.170232000  | -1.791690000 | -3.723132000 |
| O | 1.044827000  | -1.463216000 | 0.221671000  |
| O | -1.422071000 | -2.057246000 | 0.227720000  |
| O | -0.051813000 | -3.980247000 | -0.968693000 |
| O | -0.077400000 | 3.997279000  | 1.215742000  |

|    |              |              |              |
|----|--------------|--------------|--------------|
| O  | 0.007381000  | 3.922678000  | -1.422243000 |
| O  | -1.423234000 | 2.087949000  | -0.058081000 |
| O  | 0.209078000  | 1.280469000  | -3.954658000 |
| O  | 1.368656000  | -0.118163000 | -2.029751000 |
| O  | -1.098140000 | -0.090774000 | -1.419438000 |
| Zr | 2.467186000  | 0.007755000  | 0.114555000  |
| Zr | -0.080695000 | -1.617095000 | 2.039451000  |
| Zr | -0.038358000 | 1.960128000  | 1.744006000  |
| Zr | -0.022901000 | 1.635380000  | -1.804017000 |
| Zr | -2.542739000 | 0.000651000  | 0.052454000  |
| Zr | 0.010653000  | -1.949860000 | -1.547700000 |
| Br | -2.301826000 | 4.413993000  | -4.561277000 |
| Br | 2.364659000  | 4.506397000  | -4.383040000 |
| Br | 2.401243000  | -4.783526000 | -4.009869000 |
| Br | -2.256015000 | -4.792741000 | -4.165611000 |
| Fe | 1.448492000  | -0.251625000 | -3.908335000 |
| O  | 1.730583000  | -0.840506000 | -5.768319000 |
| C  | 3.947053000  | 0.156224000  | -5.276579000 |
| C  | 5.108278000  | -0.801648000 | -5.212995000 |
| H  | 3.007540000  | -0.429163000 | -5.918320000 |
| H  | 4.113987000  | 1.076085000  | -5.865363000 |
| H  | 5.862882000  | -0.435645000 | -4.506151000 |
| H  | 4.784568000  | -1.785811000 | -4.859253000 |
| H  | 5.578320000  | -0.918326000 | -6.192936000 |
| O  | 3.280230000  | 0.361673000  | -4.145324000 |
| H  | 1.591173000  | -1.785778000 | -5.923015000 |

Fe-NU-1000-Br (Prod\_4)

Free Energy: -14570.371931

Electronic Energy: -14570.5983449

|   |              |              |              |
|---|--------------|--------------|--------------|
| C | 5.726500000  | -2.889200000 | -2.160200000 |
| C | -5.638900000 | -2.885100000 | -2.451400000 |
| C | 4.388900000  | -3.187700000 | -2.460000000 |
| C | -4.293000000 | -3.161900000 | -2.734600000 |
| C | 4.106400000  | -4.252600000 | -3.328500000 |
| C | -3.986000000 | -4.236300000 | -3.582700000 |
| C | 5.138200000  | -5.020700000 | -3.859400000 |
| C | -4.998200000 | -5.035200000 | -4.107600000 |
| C | 6.482800000  | -4.751200000 | -3.537700000 |
| C | -6.351100000 | -4.782200000 | -3.807100000 |
| C | 6.755800000  | -3.657500000 | -2.694900000 |
| C | -6.649700000 | -3.679700000 | -2.983400000 |
| C | 5.673400000  | 2.762000000  | -2.369400000 |
| C | -5.668800000 | 2.628900000  | -2.684600000 |
| C | 4.341400000  | 3.021300000  | -2.724800000 |
| C | -4.324800000 | 2.872000000  | -3.008000000 |
| C | 4.069900000  | 4.017800000  | -3.673300000 |
| C | -4.019400000 | 3.907100000  | -3.904900000 |
| C | 5.105900000  | 4.760700000  | -4.231200000 |
| C | -5.033000000 | 4.692700000  | -4.448900000 |
| C | 6.444700000  | 4.526400000  | -3.861700000 |
| C | -6.384200000 | 4.462600000  | -4.123400000 |
| C | 6.708200000  | 3.500400000  | -2.934600000 |
| C | -6.680500000 | 3.408600000  | -3.237600000 |
| C | -3.223400000 | -2.332300000 | -2.105800000 |
| C | -3.315200000 | -2.089500000 | 2.441200000  |

|   |              |              |              |
|---|--------------|--------------|--------------|
| C | -3.322900000 | 2.330100000  | 2.211500000  |
| C | 3.188500000  | 2.437000000  | 2.193700000  |
| C | 3.242000000  | 2.242000000  | -2.086000000 |
| C | 3.280300000  | -2.402400000 | -1.851700000 |
| C | -3.245500000 | 2.084800000  | -2.346700000 |
| C | 3.174600000  | -2.211100000 | 2.426600000  |
| H | 5.937000000  | -2.056700000 | -1.495800000 |
| H | -5.871700000 | -2.048200000 | -1.800500000 |
| H | 4.900900000  | -5.847200000 | -4.524400000 |
| H | -4.737200000 | -5.873100000 | -4.749000000 |
| H | 7.786000000  | -3.416500000 | -2.445100000 |
| H | -7.686200000 | -3.452500000 | -2.747200000 |
| H | 5.874800000  | 1.981600000  | -1.642500000 |
| H | -5.899000000 | 1.830200000  | -1.986300000 |
| H | 4.876900000  | 5.534100000  | -4.959800000 |
| H | -4.774300000 | 5.498300000  | -5.131200000 |
| H | 7.734600000  | 3.290500000  | -2.644500000 |
| H | -7.714900000 | 3.205600000  | -2.972200000 |
| H | -7.139900000 | -5.409200000 | -4.210200000 |
| H | 7.286100000  | -5.356800000 | -3.944800000 |
| H | -7.172900000 | 5.077500000  | -4.544800000 |
| H | 7.252000000  | 5.109100000  | -4.293600000 |
| H | -4.101094000 | -2.666618000 | 2.881887000  |
| H | 3.964843000  | 3.004750000  | 2.662583000  |
| H | -4.111859000 | 2.914440000  | 2.636930000  |
| H | 3.948377000  | -2.768397000 | 2.911976000  |
| O | -3.663700000 | 1.472100000  | 1.337400000  |
| O | -3.610000000 | 1.255400000  | -1.456700000 |
| O | -3.654000000 | -1.258600000 | 1.542900000  |
| O | -2.127300000 | -2.310200000 | 2.835700000  |
| O | 1.970300000  | -2.521800000 | 2.683600000  |
| O | 2.090000000  | -2.742700000 | -2.140600000 |
| O | 3.548200000  | -1.286100000 | 1.640800000  |
| O | 3.614200000  | -1.448400000 | -1.083700000 |
| O | 3.557200000  | 1.485700000  | 1.438500000  |
| O | 3.591800000  | 1.320300000  | -1.285300000 |
| O | 2.046400000  | 2.547800000  | -2.386400000 |
| O | 1.986500000  | 2.771300000  | 2.435700000  |
| O | -2.020200000 | -2.554500000 | -2.444700000 |
| O | -3.604000000 | -1.474700000 | -1.248400000 |
| O | -2.134300000 | 2.562400000  | 2.592300000  |
| O | -2.045100000 | 2.316700000  | -2.694300000 |
| H | -1.962783000 | -2.851796000 | 0.219984000  |
| H | -1.042115000 | 1.808397000  | 4.285948000  |
| H | -0.133620000 | 0.513431000  | 4.139636000  |
| H | -0.547003000 | 1.557274000  | -4.544318000 |
| H | 0.010396000  | 4.067882000  | -0.421315000 |
| H | 0.652580000  | 4.476826000  | 1.625154000  |
| H | 0.847468000  | 4.256617000  | -1.760231000 |
| H | 1.882644000  | 0.164478000  | 2.965023000  |
| H | -1.955763000 | 2.883028000  | -0.108352000 |
| H | -0.819877000 | -1.485372000 | 4.551546000  |
| H | 0.830323000  | -2.763908000 | -3.981814000 |
| H | 0.849700000  | -4.181213000 | 1.928265000  |
| H | 0.700515000  | -4.460380000 | -1.378284000 |
| H | 0.003637000  | -4.010769000 | 0.589804000  |

|    |              |              |              |
|----|--------------|--------------|--------------|
| O  | -1.117232000 | 0.121243000  | 1.540762000  |
| O  | -0.012525000 | -3.890123000 | 1.605272000  |
| O  | 1.037300000  | 1.528397000  | 0.021773000  |
| O  | 1.310774000  | 0.156945000  | 2.190407000  |
| O  | -0.077117000 | -1.091078000 | 4.082554000  |
| O  | -0.160523000 | 1.523354000  | 4.013486000  |
| O  | 0.219141000  | -2.031556000 | -3.810242000 |
| O  | 1.037623000  | -1.479464000 | 0.220108000  |
| O  | -1.425913000 | -2.052339000 | 0.223473000  |
| O  | -0.021401000 | -3.953833000 | -0.992256000 |
| O  | -0.084954000 | 4.002526000  | 1.226916000  |
| O  | 0.008450000  | 3.919356000  | -1.419669000 |
| O  | -1.424037000 | 2.081501000  | -0.056672000 |
| O  | 0.193109000  | 1.380390000  | -3.955309000 |
| O  | 1.327721000  | -0.106211000 | -2.027224000 |
| O  | -1.134545000 | -0.096828000 | -1.443069000 |
| Zr | 2.426001000  | 0.006479000  | 0.107004000  |
| Zr | -0.087278000 | -1.620530000 | 2.036151000  |
| Zr | -0.043576000 | 1.963967000  | 1.746541000  |
| Zr | -0.019539000 | 1.615923000  | -1.807767000 |
| Zr | -2.550864000 | -0.002289000 | 0.048931000  |
| Zr | 0.000447000  | -1.909354000 | -1.575379000 |
| Br | -2.300917000 | 4.411160000  | -4.563005000 |
| Br | 2.365196000  | 4.515182000  | -4.373229000 |
| Br | 2.403109000  | -4.847536000 | -3.968650000 |
| Br | -2.256651000 | -4.803652000 | -4.149880000 |
| Fe | 1.218775000  | -0.306935000 | -4.045937000 |
| O  | 0.295497000  | -0.662781000 | -6.139487000 |
| C  | 4.130278000  | -1.133504000 | -4.742167000 |
| C  | 4.892334000  | -0.071614000 | -4.053575000 |
| H  | 4.668108000  | -1.934765000 | -5.276425000 |
| H  | 0.930170000  | -1.087038000 | -6.726026000 |
| H  | 4.672544000  | 0.901566000  | -4.513495000 |
| H  | 4.563009000  | 0.002145000  | -3.006887000 |
| H  | 5.969627000  | -0.241914000 | -4.090608000 |
| O  | 2.887017000  | -1.165866000 | -4.756776000 |
| H  | -0.201162000 | -1.396249000 | -5.735009000 |

Fe-NU-1000-NH<sub>2</sub>-O

Free Energy: -4354.174994

Electronic Energy: -4354.4459874

|   |              |              |              |
|---|--------------|--------------|--------------|
| C | 5.726500000  | -2.889197000 | -2.160203000 |
| C | -5.638900000 | -2.885099000 | -2.451401000 |
| C | 4.388912000  | -3.187715000 | -2.459985000 |
| C | -4.293000000 | -3.161884000 | -2.734616000 |
| C | 4.106379000  | -4.252607000 | -3.328502000 |
| C | -3.986003000 | -4.236297000 | -3.582702000 |
| C | 5.138208000  | -5.020693000 | -3.859394000 |
| C | -4.998199000 | -5.035201000 | -4.107600000 |
| C | 6.482800000  | -4.751202000 | -3.537698000 |
| C | -6.351100000 | -4.782200000 | -3.807100000 |
| C | 6.755800000  | -3.657500000 | -2.694900000 |
| C | -6.649700000 | -3.679700000 | -2.983400000 |
| C | 5.673400000  | 2.762000000  | -2.369401000 |
| C | -5.668800000 | 2.628900000  | -2.684600000 |
| C | 4.341400000  | 3.021300000  | -2.724800000 |

|   |              |              |              |
|---|--------------|--------------|--------------|
| C | -4.324800000 | 2.872000000  | -3.008000000 |
| C | 4.069900000  | 4.017800000  | -3.673300000 |
| C | -4.019400000 | 3.907101000  | -3.904899000 |
| C | 5.105900000  | 4.760701000  | -4.231199000 |
| C | -5.033000000 | 4.692700000  | -4.448900000 |
| C | 6.444700000  | 4.526401000  | -3.861699000 |
| C | -6.384200000 | 4.462600000  | -4.123400000 |
| C | 6.708200000  | 3.500400000  | -2.934600000 |
| C | -6.680500000 | 3.408600000  | -3.237600000 |
| C | -3.223402000 | -2.332249000 | -2.105829000 |
| C | -3.315200000 | -2.089499000 | 2.441195000  |
| C | -3.322896000 | 2.330083000  | 2.211506000  |
| C | 3.188497000  | 2.437002000  | 2.193698000  |
| C | 3.242009000  | 2.242024000  | -2.086021000 |
| C | 3.280301000  | -2.402489000 | -1.851592000 |
| C | -3.245495000 | 2.084780000  | -2.346703000 |
| C | 3.174599000  | -2.211105000 | 2.426596000  |
| H | 5.937000000  | -2.056700000 | -1.495800000 |
| H | -5.871700000 | -2.048200000 | -1.800500000 |
| H | 4.900900000  | -5.847197000 | -4.524404000 |
| H | -4.737200000 | -5.873100000 | -4.748999000 |
| H | 7.786000000  | -3.416500000 | -2.445100000 |
| H | -7.686200000 | -3.452500000 | -2.747200000 |
| H | 5.874800000  | 1.981600000  | -1.642500000 |
| H | -5.899000000 | 1.830200000  | -1.986300000 |
| H | 4.876900000  | 5.534099000  | -4.959801000 |
| H | -4.774300000 | 5.498300000  | -5.131200000 |
| H | 7.734600000  | 3.290500000  | -2.644500000 |
| H | -7.714900000 | 3.205600000  | -2.972200000 |
| H | -7.139900000 | -5.409200000 | -4.210200000 |
| H | 7.286100000  | -5.356800000 | -3.944800000 |
| H | -7.172900000 | 5.077500000  | -4.544800000 |
| H | 7.252000000  | 5.109100000  | -4.293600000 |
| H | -4.101095000 | -2.666613000 | 2.881892000  |
| H | 3.964843000  | 3.004750000  | 2.662583000  |
| H | -4.111860000 | 2.914435000  | 2.636935000  |
| H | 3.948376000  | -2.768392000 | 2.911982000  |
| O | -3.663682000 | 1.472095000  | 1.337394000  |
| O | -3.609955000 | 1.255397000  | -1.456714000 |
| O | -3.653975000 | -1.258618000 | 1.542896000  |
| O | -2.127298000 | -2.310244000 | 2.835710000  |
| O | 1.970294000  | -2.521876000 | 2.683623000  |
| O | 2.090019000  | -2.742733000 | -2.140519000 |
| O | 3.548222000  | -1.286116000 | 1.640803000  |
| O | 3.614225000  | -1.448477000 | -1.083643000 |
| O | 3.557211000  | 1.485685000  | 1.438499000  |
| O | 3.591822000  | 1.320294000  | -1.285292000 |
| O | 2.046253000  | 2.548015000  | -2.386623000 |
| O | 1.986509000  | 2.771304000  | 2.435694000  |
| O | -2.020185000 | -2.554370000 | -2.444694000 |
| O | -3.603975000 | -1.474693000 | -1.248418000 |
| O | -2.134287000 | 2.562377000  | 2.592298000  |
| O | -2.045207000 | 2.316699000  | -2.694277000 |
| H | -1.964459000 | -2.857364000 | 0.224894000  |
| H | -1.027146000 | 1.824299000  | 4.293116000  |
| H | -0.136965000 | 0.515439000  | 4.138634000  |



|    |              |              |              |
|----|--------------|--------------|--------------|
| H  | -0.477049000 | 1.516373000  | -4.657655000 |
| H  | -0.005242000 | 4.080866000  | -0.428552000 |
| H  | 0.650306000  | 4.475854000  | 1.595615000  |
| H  | 0.903998000  | 4.233581000  | -1.719777000 |
| H  | 1.864512000  | 0.165351000  | 2.984407000  |
| H  | -1.960233000 | 2.887316000  | -0.097039000 |
| H  | -0.814211000 | -1.488910000 | 4.547731000  |
| H  | -0.519324000 | -2.048899000 | -4.405928000 |
| H  | 0.858297000  | -4.197611000 | 1.903793000  |
| H  | 0.752168000  | -4.452818000 | -1.384096000 |
| H  | -0.004533000 | -4.033148000 | 0.581845000  |
| O  | -1.116246000 | 0.118679000  | 1.527404000  |
| O  | 0.000315000  | -3.889746000 | 1.584598000  |
| O  | 1.038180000  | 1.485210000  | 0.003432000  |
| O  | 1.317231000  | 0.155217000  | 2.191715000  |
| O  | -0.079777000 | -1.087029000 | 4.071776000  |
| O  | -0.155691000 | 1.524175000  | 4.004340000  |
| O  | 0.187779000  | -1.849688000 | -3.782246000 |
| O  | 1.046419000  | -1.449149000 | 0.197012000  |
| O  | -1.416152000 | -2.065290000 | 0.217761000  |
| O  | -0.032771000 | -3.996876000 | -1.057656000 |
| O  | -0.074027000 | 3.986333000  | 1.191163000  |
| O  | 0.026151000  | 3.941568000  | -1.434181000 |
| O  | -1.421803000 | 2.089203000  | -0.058975000 |
| O  | 0.187567000  | 1.369223000  | -3.976876000 |
| O  | 1.341533000  | -0.115409000 | -2.130654000 |
| O  | -1.098470000 | -0.091322000 | -1.432982000 |
| Zr | 2.501353000  | 0.002469000  | 0.120438000  |
| Zr | -0.083472000 | -1.614473000 | 2.031954000  |
| Zr | -0.039797000 | 1.952435000  | 1.743260000  |
| Zr | -0.029167000 | 1.636038000  | -1.783042000 |
| Zr | -2.566130000 | -0.002058000 | 0.039817000  |
| Zr | 0.011261000  | -1.940469000 | -1.547674000 |
| N  | 2.785352000  | 4.360065000  | -4.084857000 |
| H  | 2.097411000  | 3.626648000  | -4.008583000 |
| H  | 2.768762000  | 4.841578000  | -4.970888000 |
| N  | -2.736390000 | 4.202670000  | -4.335436000 |
| H  | -2.628602000 | 5.132300000  | -4.708084000 |
| H  | -1.986438000 | 3.889948000  | -3.740017000 |
| N  | -2.693295000 | -4.562234000 | -3.964982000 |
| H  | -1.959928000 | -4.240044000 | -3.351552000 |
| H  | -2.588172000 | -5.513792000 | -4.279668000 |
| N  | 2.826424000  | -4.645479000 | -3.695186000 |
| H  | 2.801636000  | -5.191377000 | -4.542024000 |
| H  | 2.109190000  | -3.940508000 | -3.632878000 |
| Fe | 1.220766000  | -0.261327000 | -3.980433000 |
| O  | 1.835436000  | -0.348751000 | -5.482730000 |

Fe-NU-1000-NH<sub>2</sub> (Ads\_4)

Free Energy: -4509.156997

Electronic Energy: -4509.5079679

|   |              |              |              |
|---|--------------|--------------|--------------|
| C | 5.726500000  | -2.889201000 | -2.160198000 |
| C | -5.638900000 | -2.885101000 | -2.451399000 |
| C | 4.388896000  | -3.187695000 | -2.460004000 |
| C | -4.292999000 | -3.161913000 | -2.734586000 |
| C | 4.106408000  | -4.252598000 | -3.328498000 |

|   |              |              |              |
|---|--------------|--------------|--------------|
| C | -3.985999000 | -4.236302000 | -3.582698000 |
| C | 5.138197000  | -5.020703000 | -3.859402000 |
| C | -4.998200000 | -5.035199000 | -4.107601000 |
| C | 6.482800000  | -4.751199000 | -3.537701000 |
| C | -6.351100000 | -4.782200000 | -3.807100000 |
| C | 6.755800000  | -3.657500000 | -2.694900000 |
| C | -6.649700000 | -3.679700000 | -2.983400000 |
| C | 5.673400000  | 2.762000000  | -2.369400000 |
| C | -5.668800000 | 2.628900000  | -2.684600000 |
| C | 4.341401000  | 3.021302000  | -2.724798000 |
| C | -4.324800000 | 2.872003000  | -3.007997000 |
| C | 4.069899000  | 4.017800000  | -3.673300000 |
| C | -4.019400000 | 3.907100000  | -3.904900000 |
| C | 5.105901000  | 4.760699000  | -4.231200000 |
| C | -5.033000000 | 4.692700000  | -4.448900000 |
| C | 6.444700000  | 4.526400000  | -3.861700000 |
| C | -6.384200000 | 4.462600000  | -4.123400000 |
| C | 6.708200000  | 3.500400000  | -2.934600000 |
| C | -6.680500000 | 3.408600000  | -3.237600000 |
| C | -3.223401000 | -2.332346000 | -2.105783000 |
| C | -3.315199000 | -2.089500000 | 2.441202000  |
| C | -3.322901000 | 2.330109000  | 2.211494000  |
| C | 3.188501000  | 2.436997000  | 2.193702000  |
| C | 3.241997000  | 2.241997000  | -2.085989000 |
| C | 3.280301000  | -2.402361000 | -1.851753000 |
| C | -3.245502000 | 2.084815000  | -2.346699000 |
| C | 3.174600000  | -2.211098000 | 2.426600000  |
| H | 5.937000000  | -2.056700000 | -1.495800000 |
| H | -5.871700000 | -2.048200000 | -1.800500000 |
| H | 4.900900000  | -5.847201000 | -4.524399000 |
| H | -4.737200000 | -5.873100000 | -4.749000000 |
| H | 7.786000000  | -3.416500000 | -2.445100000 |
| H | -7.686200000 | -3.452500000 | -2.747200000 |
| H | 5.874800000  | 1.981600000  | -1.642500000 |
| H | -5.899000000 | 1.830200000  | -1.986300000 |
| H | 4.876900000  | 5.534100000  | -4.959800000 |
| H | -4.774300000 | 5.498300000  | -5.131200000 |
| H | 7.734600000  | 3.290500000  | -2.644500000 |
| H | -7.714900000 | 3.205600000  | -2.972200000 |
| H | -7.139900000 | -5.409200000 | -4.210200000 |
| H | 7.286100000  | -5.356800000 | -3.944800000 |
| H | -7.172900000 | 5.077500000  | -4.544800000 |
| H | 7.252000000  | 5.109100000  | -4.293600000 |
| H | -4.101094000 | -2.666620000 | 2.881885000  |
| H | 3.964843000  | 3.004749000  | 2.662585000  |
| H | -4.111859000 | 2.914440000  | 2.636930000  |
| H | 3.948377000  | -2.768399000 | 2.911974000  |
| O | -3.663727000 | 1.472101000  | 1.337394000  |
| O | -3.610017000 | 1.255411000  | -1.456693000 |
| O | -3.654019000 | -1.258591000 | 1.542892000  |
| O | -2.127289000 | -2.310196000 | 2.835699000  |
| O | 1.970300000  | -2.521777000 | 2.683583000  |
| O | 2.089969000  | -2.742601000 | -2.140665000 |
| O | 3.548195000  | -1.286088000 | 1.640795000  |
| O | 3.614180000  | -1.448379000 | -1.083713000 |
| O | 3.557196000  | 1.485695000  | 1.438500000  |

|    |              |              |              |
|----|--------------|--------------|--------------|
| O  | 3.591779000  | 1.320311000  | -1.285294000 |
| O  | 2.046487000  | 2.547620000  | -2.386289000 |
| O  | 1.986488000  | 2.771316000  | 2.435684000  |
| O  | -2.020192000 | -2.554461000 | -2.444699000 |
| O  | -3.603996000 | -1.474714000 | -1.248387000 |
| O  | -2.134301000 | 2.562438000  | 2.592287000  |
| O  | -2.045053000 | 2.316614000  | -2.694281000 |
| H  | -1.965073000 | -2.849294000 | 0.221919000  |
| H  | -1.033886000 | 1.822128000  | 4.279767000  |
| H  | -0.137427000 | 0.517956000  | 4.133980000  |
| H  | -0.456605000 | 1.540061000  | -4.662334000 |
| H  | -0.009395000 | 4.069579000  | -0.440351000 |
| H  | 0.650689000  | 4.475195000  | 1.594790000  |
| H  | 0.916401000  | 4.208543000  | -1.713262000 |
| H  | 1.865292000  | 0.166340000  | 2.980753000  |
| H  | -1.957094000 | 2.884823000  | -0.101132000 |
| H  | -0.817355000 | -1.486734000 | 4.543104000  |
| H  | -0.530428000 | -2.101084000 | -4.399528000 |
| H  | 0.852634000  | -4.186042000 | 1.893673000  |
| H  | 0.792755000  | -4.410769000 | -1.312925000 |
| H  | -0.018364000 | -4.009779000 | 0.573967000  |
| O  | -1.119013000 | 0.121318000  | 1.531325000  |
| O  | -0.009624000 | -3.882767000 | 1.582134000  |
| O  | 1.040213000  | 1.486462000  | 0.000257000  |
| O  | 1.317042000  | 0.156329000  | 2.188942000  |
| O  | -0.079468000 | -1.086999000 | 4.070825000  |
| O  | -0.157261000 | 1.526641000  | 4.001714000  |
| O  | 0.180154000  | -1.896526000 | -3.781405000 |
| O  | 1.045513000  | -1.447351000 | 0.193884000  |
| O  | -1.420265000 | -2.055156000 | 0.218312000  |
| O  | -0.027313000 | -3.979758000 | -1.051372000 |
| O  | -0.077416000 | 3.988777000  | 1.193642000  |
| O  | 0.029573000  | 3.931557000  | -1.443031000 |
| O  | -1.422159000 | 2.084898000  | -0.057496000 |
| O  | 0.214571000  | 1.431069000  | -3.979689000 |
| O  | 1.265374000  | -0.115313000 | -2.169883000 |
| O  | -1.140333000 | -0.093215000 | -1.436215000 |
| Zr | 2.486950000  | 0.001687000  | 0.115793000  |
| Zr | -0.086581000 | -1.609739000 | 2.027567000  |
| Zr | -0.040437000 | 1.953956000  | 1.736498000  |
| Zr | -0.032856000 | 1.606914000  | -1.797484000 |
| Zr | -2.574626000 | 0.000026000  | 0.043696000  |
| Zr | 0.000662000  | -1.904660000 | -1.567709000 |
| N  | 2.788612000  | 4.348316000  | -4.091113000 |
| H  | 2.082805000  | 3.637433000  | -3.972449000 |
| H  | 2.755448000  | 4.838664000  | -4.970765000 |
| N  | -2.736390000 | 4.202131000  | -4.334466000 |
| H  | -2.625405000 | 5.133314000  | -4.701833000 |
| H  | -1.986309000 | 3.878293000  | -3.744597000 |
| N  | -2.693206000 | -4.561125000 | -3.965201000 |
| H  | -1.960065000 | -4.228187000 | -3.356895000 |
| H  | -2.585800000 | -5.513981000 | -4.274552000 |
| N  | 2.848951000  | -4.522808000 | -3.831807000 |
| H  | 2.728840000  | -5.407877000 | -4.293354000 |
| H  | 2.051168000  | -4.112869000 | -3.375270000 |
| Fe | 1.151036000  | -0.263988000 | -4.114889000 |

|   |             |              |              |
|---|-------------|--------------|--------------|
| O | 1.057977000 | -0.315491000 | -5.749763000 |
| C | 4.028963000 | 0.091878000  | -4.870928000 |
| C | 5.471457000 | -0.180621000 | -4.547146000 |
| H | 3.797790000 | 0.036297000  | -5.940114000 |
| H | 3.720886000 | 1.082415000  | -4.517367000 |
| H | 5.630789000 | -0.122005000 | -3.467425000 |
| H | 5.778866000 | -1.176485000 | -4.884439000 |
| H | 6.112044000 | 0.561643000  | -5.031847000 |
| O | 3.173519000 | -0.838899000 | -4.154234000 |
| H | 3.205325000 | -1.697550000 | -4.604405000 |

Fe-NU-1000-NH<sub>2</sub> (TS1\_4)

Free Energy: -4509.140643

Electronic Energy: -4509.4881216

|   |              |              |              |
|---|--------------|--------------|--------------|
| C | 5.726500000  | -2.889200000 | -2.160200000 |
| C | -5.638900000 | -2.885100000 | -2.451400000 |
| C | 4.388900000  | -3.187700000 | -2.460000000 |
| C | -4.293000000 | -3.161900000 | -2.734600000 |
| C | 4.106400000  | -4.252600000 | -3.328500000 |
| C | -3.986000000 | -4.236300000 | -3.582700000 |
| C | 5.138200000  | -5.020700000 | -3.859400000 |
| C | -4.998200000 | -5.035200000 | -4.107600000 |
| C | 6.482800000  | -4.751200000 | -3.537700000 |
| C | -6.351100000 | -4.782200000 | -3.807100000 |
| C | 6.755800000  | -3.657500000 | -2.694900000 |
| C | -6.649700000 | -3.679700000 | -2.983400000 |
| C | 5.673400000  | 2.762000000  | -2.369400000 |
| C | -5.668800000 | 2.628900000  | -2.684600000 |
| C | 4.341400000  | 3.021300000  | -2.724800000 |
| C | -4.324800000 | 2.872000000  | -3.008000000 |
| C | 4.069900000  | 4.017800000  | -3.673300000 |
| C | -4.019400000 | 3.907100000  | -3.904900000 |
| C | 5.105900000  | 4.760700000  | -4.231200000 |
| C | -5.033000000 | 4.692700000  | -4.448900000 |
| C | 6.444700000  | 4.526400000  | -3.861700000 |
| C | -6.384200000 | 4.462600000  | -4.123400000 |
| C | 6.708200000  | 3.500400000  | -2.934600000 |
| C | -6.680500000 | 3.408600000  | -3.237600000 |
| C | -3.223400000 | -2.332300000 | -2.105800000 |
| C | -3.315200000 | -2.089500000 | 2.441200000  |
| C | -3.322900000 | 2.330100000  | 2.211500000  |
| C | 3.188500000  | 2.437000000  | 2.193700000  |
| C | 3.242000000  | 2.242000000  | -2.086000000 |
| C | 3.280300000  | -2.402400000 | -1.851700000 |
| C | -3.245500000 | 2.084800000  | -2.346700000 |
| C | 3.174600000  | -2.211100000 | 2.426600000  |
| H | 5.937000000  | -2.056700000 | -1.495800000 |
| H | -5.871700000 | -2.048200000 | -1.800500000 |
| H | 4.900900000  | -5.847200000 | -4.524400000 |
| H | -4.737200000 | -5.873100000 | -4.749000000 |
| H | 7.786000000  | -3.416500000 | -2.445100000 |
| H | -7.686200000 | -3.452500000 | -2.747200000 |
| H | 5.874800000  | 1.981600000  | -1.642500000 |
| H | -5.899000000 | 1.830200000  | -1.986300000 |
| H | 4.876900000  | 5.534100000  | -4.959800000 |
| H | -4.774300000 | 5.498300000  | -5.131200000 |

|   |              |              |              |
|---|--------------|--------------|--------------|
| H | 7.734600000  | 3.290500000  | -2.644500000 |
| H | -7.714900000 | 3.205600000  | -2.972200000 |
| H | -7.139900000 | -5.409200000 | -4.210200000 |
| H | 7.286100000  | -5.356800000 | -3.944800000 |
| H | -7.172900000 | 5.077500000  | -4.544800000 |
| H | 7.252000000  | 5.109100000  | -4.293600000 |
| H | -4.101094000 | -2.666618000 | 2.881887000  |
| H | 3.964843000  | 3.004750000  | 2.662583000  |
| H | -4.111859000 | 2.914440000  | 2.636930000  |
| H | 3.948377000  | -2.768397000 | 2.911976000  |
| O | -3.663700000 | 1.472100000  | 1.337400000  |
| O | -3.610000000 | 1.255400000  | -1.456700000 |
| O | -3.654000000 | -1.258600000 | 1.542900000  |
| O | -2.127300000 | -2.310200000 | 2.835700000  |
| O | 1.970300000  | -2.521800000 | 2.683600000  |
| O | 2.090000000  | -2.742700000 | -2.140600000 |
| O | 3.548200000  | -1.286100000 | 1.640800000  |
| O | 3.614200000  | -1.448400000 | -1.083700000 |
| O | 3.557200000  | 1.485700000  | 1.438500000  |
| O | 3.591800000  | 1.320300000  | -1.285300000 |
| O | 2.046400000  | 2.547800000  | -2.386400000 |
| O | 1.986500000  | 2.771300000  | 2.435700000  |
| O | -2.020200000 | -2.554500000 | -2.444700000 |
| O | -3.604000000 | -1.474700000 | -1.248400000 |
| O | -2.134300000 | 2.562400000  | 2.592300000  |
| O | -2.045100000 | 2.316700000  | -2.694300000 |
| H | -1.959345000 | -2.850458000 | 0.215988000  |
| H | -1.029100000 | 1.823724000  | 4.275380000  |
| H | -0.139274000 | 0.514371000  | 4.125880000  |
| H | -0.606850000 | 1.584722000  | -4.580419000 |
| H | 0.004974000  | 4.088799000  | -0.436511000 |
| H | 0.654736000  | 4.474163000  | 1.598028000  |
| H | 0.901726000  | 4.240750000  | -1.738457000 |
| H | 1.857737000  | 0.162988000  | 2.986808000  |
| H | -1.955709000 | 2.891882000  | -0.094129000 |
| H | -0.815879000 | -1.491468000 | 4.529113000  |
| H | -0.526677000 | -2.040008000 | -4.421408000 |
| H | 0.856949000  | -4.199917000 | 1.880757000  |
| H | 0.757323000  | -4.436032000 | -1.392989000 |
| H | -0.001493000 | -4.019215000 | 0.553909000  |
| O | -1.116170000 | 0.120603000  | 1.524158000  |
| O | 0.004058000  | -3.881174000 | 1.559655000  |
| O | 1.045403000  | 1.469204000  | -0.009337000 |
| O | 1.320697000  | 0.154544000  | 2.187104000  |
| O | -0.079119000 | -1.089505000 | 4.056782000  |
| O | -0.155287000 | 1.523228000  | 3.993452000  |
| O | 0.187315000  | -1.863018000 | -3.797316000 |
| O | 1.049701000  | -1.425077000 | 0.167763000  |
| O | -1.412463000 | -2.057422000 | 0.208592000  |
| O | -0.031152000 | -3.982593000 | -1.072509000 |
| O | -0.066124000 | 3.985045000  | 1.187106000  |
| O | 0.027625000  | 3.948988000  | -1.440718000 |
| O | -1.418280000 | 2.092840000  | -0.061636000 |
| O | 0.134106000  | 1.494080000  | -3.970222000 |
| O | 1.300116000  | -0.107963000 | -2.262633000 |
| O | -1.100499000 | -0.084972000 | -1.438550000 |

|    |              |              |              |
|----|--------------|--------------|--------------|
| Zr | 2.511581000  | 0.009326000  | 0.129889000  |
| Zr | -0.082426000 | -1.611512000 | 2.015375000  |
| Zr | -0.037381000 | 1.950525000  | 1.731397000  |
| Zr | -0.030367000 | 1.647427000  | -1.800603000 |
| Zr | -2.565620000 | -0.000717000 | 0.035240000  |
| Zr | 0.008937000  | -1.923843000 | -1.579922000 |
| N  | 2.784612000  | 4.339361000  | -4.097811000 |
| H  | 2.116087000  | 3.584415000  | -4.039653000 |
| H  | 2.773071000  | 4.818158000  | -4.985672000 |
| N  | -2.737226000 | 4.200689000  | -4.336999000 |
| H  | -2.627852000 | 5.126036000  | -4.719206000 |
| H  | -1.983227000 | 3.886518000  | -3.747588000 |
| N  | -2.693899000 | -4.562646000 | -3.964464000 |
| H  | -1.958505000 | -4.235361000 | -3.356346000 |
| H  | -2.587563000 | -5.513574000 | -4.280084000 |
| N  | 2.828457000  | -4.636653000 | -3.702267000 |
| H  | 2.793555000  | -5.194572000 | -4.540149000 |
| H  | 2.099571000  | -3.946499000 | -3.613708000 |
| Fe | 1.107767000  | -0.201291000 | -4.109551000 |
| O  | 0.965932000  | -0.286663000 | -5.823120000 |
| C  | 3.977032000  | -0.654377000 | -4.839650000 |
| C  | 5.153508000  | -0.175532000 | -4.033036000 |
| H  | 3.594313000  | -1.609494000 | -4.443725000 |
| H  | 4.266853000  | -0.848243000 | -5.882101000 |
| H  | 5.529491000  | 0.771661000  | -4.430351000 |
| H  | 4.871771000  | -0.022052000 | -2.986391000 |
| H  | 5.959578000  | -0.914738000 | -4.068997000 |
| O  | 2.936488000  | 0.328613000  | -4.847649000 |
| H  | 2.119042000  | 0.096017000  | -5.733016000 |

Fe-NU-1000-NH<sub>2</sub> (Int\_4)

Free Energy: -4509.175844

Electronic Energy: -4509.5266461

|   |              |              |              |
|---|--------------|--------------|--------------|
| C | 5.726500000  | -2.889202000 | -2.160197000 |
| C | -5.638900000 | -2.885106000 | -2.451393000 |
| C | 4.388900000  | -3.187724000 | -2.459971000 |
| C | -4.292995000 | -3.161933000 | -2.734566000 |
| C | 4.106399000  | -4.252604000 | -3.328495000 |
| C | -3.985999000 | -4.236310000 | -3.582687000 |
| C | 5.138201000  | -5.020698000 | -3.859402000 |
| C | -4.998200000 | -5.035199000 | -4.107601000 |
| C | 6.482800000  | -4.751199000 | -3.537702000 |
| C | -6.351100000 | -4.782198000 | -3.807102000 |
| C | 6.755800000  | -3.657500000 | -2.694900000 |
| C | -6.649700000 | -3.679700000 | -2.983400000 |
| C | 5.673400000  | 2.761999000  | -2.369401000 |
| C | -5.668799000 | 2.628905000  | -2.684594000 |
| C | 4.341460000  | 3.021353000  | -2.724759000 |
| C | -4.324796000 | 2.872035000  | -3.007967000 |
| C | 4.069797000  | 4.017808000  | -3.673344000 |
| C | -4.019399000 | 3.907109000  | -3.904889000 |
| C | 5.105944000  | 4.760658000  | -4.231175000 |
| C | -5.033000000 | 4.692699000  | -4.448901000 |
| C | 6.444700000  | 4.526398000  | -3.861702000 |
| C | -6.384200000 | 4.462598000  | -4.123402000 |
| C | 6.708200000  | 3.500400000  | -2.934600000 |

|   |              |              |              |
|---|--------------|--------------|--------------|
| C | -6.680500000 | 3.408600000  | -3.237600000 |
| C | -3.223438000 | -2.332414000 | -2.105856000 |
| C | -3.315197000 | -2.089480000 | 2.441199000  |
| C | -3.322890000 | 2.330080000  | 2.211501000  |
| C | 3.188494000  | 2.436985000  | 2.193707000  |
| C | 3.242012000  | 2.242113000  | -2.085943000 |
| C | 3.280315000  | -2.402487000 | -1.851640000 |
| C | -3.245524000 | 2.084897000  | -2.346741000 |
| C | 3.174595000  | -2.211088000 | 2.426599000  |
| H | 5.937000000  | -2.056700000 | -1.495800000 |
| H | -5.871700000 | -2.048200000 | -1.800500000 |
| H | 4.900900000  | -5.847200000 | -4.524400000 |
| H | -4.737200000 | -5.873098000 | -4.749003000 |
| H | 7.786000000  | -3.416500000 | -2.445100000 |
| H | -7.686200000 | -3.452500000 | -2.747200000 |
| H | 5.874800000  | 1.981600000  | -1.642500000 |
| H | -5.899000000 | 1.830200000  | -1.986300000 |
| H | 4.876899000  | 5.534111000  | -4.959788000 |
| H | -4.774300000 | 5.498298000  | -5.131202000 |
| H | 7.734600000  | 3.290500000  | -2.644500000 |
| H | -7.714900000 | 3.205600000  | -2.972200000 |
| H | -7.139900000 | -5.409200000 | -4.210200000 |
| H | 7.286100000  | -5.356800000 | -3.944800000 |
| H | -7.172900000 | 5.077500000  | -4.544800000 |
| H | 7.252000000  | 5.109100000  | -4.293600000 |
| H | -4.101096000 | -2.666608000 | 2.881897000  |
| H | 3.964842000  | 3.004739000  | 2.662597000  |
| H | -4.111861000 | 2.914429000  | 2.636942000  |
| H | 3.948376000  | -2.768390000 | 2.911984000  |
| O | -3.663726000 | 1.472089000  | 1.337396000  |
| O | -3.609958000 | 1.255455000  | -1.456658000 |
| O | -3.654014000 | -1.258601000 | 1.542897000  |
| O | -2.127284000 | -2.310291000 | 2.835696000  |
| O | 1.970317000  | -2.521860000 | 2.683561000  |
| O | 2.090023000  | -2.742347000 | -2.140755000 |
| O | 3.548203000  | -1.286089000 | 1.640808000  |
| O | 3.614163000  | -1.448465000 | -1.083629000 |
| O | 3.557212000  | 1.485679000  | 1.438517000  |
| O | 3.591777000  | 1.320374000  | -1.285223000 |
| O | 2.046444000  | 2.547416000  | -2.386560000 |
| O | 1.986508000  | 2.771378000  | 2.435641000  |
| O | -2.020261000 | -2.553914000 | -2.444743000 |
| O | -3.603949000 | -1.474766000 | -1.248348000 |
| O | -2.134287000 | 2.562484000  | 2.592264000  |
| O | -2.045138000 | 2.316158000  | -2.694291000 |
| H | -1.966554000 | -2.859407000 | 0.237171000  |
| H | -1.031818000 | 1.831626000  | 4.278184000  |
| H | -0.136995000 | 0.526234000  | 4.137505000  |
| H | -0.507851000 | 1.324578000  | -4.573271000 |
| H | -0.005388000 | 4.072701000  | -0.446080000 |
| H | 0.652214000  | 4.475671000  | 1.585437000  |
| H | 0.906526000  | 4.212521000  | -1.735517000 |
| H | 1.862898000  | 0.173689000  | 2.988099000  |
| H | -1.960015000 | 2.883073000  | -0.099702000 |
| H | -0.815549000 | -1.483070000 | 4.551972000  |
| H | -0.741179000 | -1.646237000 | -4.077864000 |

|    |              |              |              |
|----|--------------|--------------|--------------|
| H  | 0.856067000  | -4.190091000 | 1.926787000  |
| H  | 0.751523000  | -4.465594000 | -1.357386000 |
| H  | -0.005508000 | -4.036220000 | 0.602604000  |
| O  | -1.117341000 | 0.118989000  | 1.531020000  |
| O  | -0.003964000 | -3.889780000 | 1.605672000  |
| O  | 1.037332000  | 1.477110000  | -0.004521000 |
| O  | 1.318083000  | 0.158935000  | 2.193902000  |
| O  | -0.078934000 | -1.083361000 | 4.077556000  |
| O  | -0.156117000 | 1.533237000  | 4.000045000  |
| O  | 0.149065000  | -1.796702000 | -3.731740000 |
| O  | 1.053566000  | -1.451757000 | 0.209833000  |
| O  | -1.419228000 | -2.066877000 | 0.226980000  |
| O  | -0.028625000 | -4.002919000 | -1.030714000 |
| O  | -0.072379000 | 3.985549000  | 1.182352000  |
| O  | 0.024438000  | 3.932187000  | -1.449941000 |
| O  | -1.421167000 | 2.085217000  | -0.064259000 |
| O  | 0.227499000  | 1.314731000  | -3.952021000 |
| O  | 1.343998000  | -0.132242000 | -2.092600000 |
| O  | -1.104462000 | -0.097234000 | -1.432685000 |
| Zr | 2.504868000  | 0.010394000  | 0.119543000  |
| Zr | -0.082779000 | -1.610933000 | 2.038403000  |
| Zr | -0.038150000 | 1.952430000  | 1.732831000  |
| Zr | -0.029080000 | 1.627502000  | -1.808728000 |
| Zr | -2.563527000 | 0.000213000  | 0.040932000  |
| Zr | 0.012734000  | -1.943188000 | -1.524694000 |
| N  | 2.784832000  | 4.339288000  | -4.098544000 |
| H  | 2.110400000  | 3.591415000  | -4.025416000 |
| H  | 2.769265000  | 4.815952000  | -4.987225000 |
| N  | -2.738608000 | 4.200336000  | -4.337553000 |
| H  | -2.625385000 | 5.127029000  | -4.714837000 |
| H  | -1.982712000 | 3.872227000  | -3.758410000 |
| N  | -2.696856000 | -4.555520000 | -3.974455000 |
| H  | -1.953398000 | -4.203766000 | -3.390483000 |
| H  | -2.581525000 | -5.505976000 | -4.287250000 |
| N  | 2.828813000  | -4.640362000 | -3.700448000 |
| H  | 2.791994000  | -5.198199000 | -4.538044000 |
| H  | 2.094103000  | -3.958909000 | -3.599124000 |
| Fe | 1.461595000  | -0.302393000 | -3.925038000 |
| O  | 1.458170000  | -0.703291000 | -5.694146000 |
| C  | 4.096283000  | -0.399207000 | -4.907580000 |
| C  | 5.456154000  | 0.219472000  | -4.669727000 |
| H  | 4.132342000  | -1.484529000 | -4.714231000 |
| H  | 3.760349000  | -0.270632000 | -5.946225000 |
| H  | 5.455869000  | 1.283625000  | -4.920586000 |
| H  | 5.739871000  | 0.122006000  | -3.618068000 |
| H  | 6.206911000  | -0.286734000 | -5.284090000 |
| O  | 3.172432000  | 0.208046000  | -4.033760000 |
| H  | 0.843120000  | -1.439005000 | -5.818941000 |

Fe-NU-1000-NH<sub>2</sub> (TS2\_4)

Free Energy: -4509.161457

Electronic Energy: -4509.5052988

|   |              |              |              |
|---|--------------|--------------|--------------|
| C | 5.726500000  | -2.889200000 | -2.160200000 |
| C | -5.638900000 | -2.885100000 | -2.451400000 |
| C | 4.388900000  | -3.187700000 | -2.460000000 |
| C | -4.293000000 | -3.161900000 | -2.734600000 |



|   |              |              |              |
|---|--------------|--------------|--------------|
| C | 4.106400000  | -4.252600000 | -3.328500000 |
| C | -3.986000000 | -4.236300000 | -3.582700000 |
| C | 5.138200000  | -5.020700000 | -3.859400000 |
| C | -4.998200000 | -5.035200000 | -4.107600000 |
| C | 6.482800000  | -4.751200000 | -3.537700000 |
| C | -6.351100000 | -4.782200000 | -3.807100000 |
| C | 6.755800000  | -3.657500000 | -2.694900000 |
| C | -6.649700000 | -3.679700000 | -2.983400000 |
| C | 5.673400000  | 2.762000000  | -2.369400000 |
| C | -5.668800000 | 2.628900000  | -2.684600000 |
| C | 4.341400000  | 3.021300000  | -2.724800000 |
| C | -4.324800000 | 2.872000000  | -3.008000000 |
| C | 4.069900000  | 4.017800000  | -3.673300000 |
| C | -4.019400000 | 3.907100000  | -3.904900000 |
| C | 5.105900000  | 4.760700000  | -4.231200000 |
| C | -5.033000000 | 4.692700000  | -4.448900000 |
| C | 6.444700000  | 4.526400000  | -3.861700000 |
| C | -6.384200000 | 4.462600000  | -4.123400000 |
| C | 6.708200000  | 3.500400000  | -2.934600000 |
| C | -6.680500000 | 3.408600000  | -3.237600000 |
| C | -3.223400000 | -2.332300000 | -2.105800000 |
| C | -3.315200000 | -2.089500000 | 2.441200000  |
| C | -3.322900000 | 2.330100000  | 2.211500000  |
| C | 3.188500000  | 2.437000000  | 2.193700000  |
| C | 3.242000000  | 2.242000000  | -2.086000000 |
| C | 3.280300000  | -2.402400000 | -1.851700000 |
| C | -3.245500000 | 2.084800000  | -2.346700000 |
| C | 3.174600000  | -2.211100000 | 2.426600000  |
| H | 5.937000000  | -2.056700000 | -1.495800000 |
| H | -5.871700000 | -2.048200000 | -1.800500000 |
| H | 4.900900000  | -5.847200000 | -4.524400000 |
| H | -4.737200000 | -5.873100000 | -4.749000000 |
| H | 7.786000000  | -3.416500000 | -2.445100000 |
| H | -7.686200000 | -3.452500000 | -2.747200000 |
| H | 5.874800000  | 1.981600000  | -1.642500000 |
| H | -5.899000000 | 1.830200000  | -1.986300000 |
| H | 4.876900000  | 5.534100000  | -4.959800000 |
| H | -4.774300000 | 5.498300000  | -5.131200000 |
| H | 7.734600000  | 3.290500000  | -2.644500000 |
| H | -7.714900000 | 3.205600000  | -2.972200000 |
| H | -7.139900000 | -5.409200000 | -4.210200000 |
| H | 7.286100000  | -5.356800000 | -3.944800000 |
| H | -7.172900000 | 5.077500000  | -4.544800000 |
| H | 7.252000000  | 5.109100000  | -4.293600000 |
| H | -4.101094000 | -2.666618000 | 2.881887000  |
| H | 3.964843000  | 3.004750000  | 2.662583000  |
| H | -4.111859000 | 2.914440000  | 2.636930000  |
| H | 3.948377000  | -2.768397000 | 2.911976000  |
| O | -3.663700000 | 1.472100000  | 1.337400000  |
| O | -3.610000000 | 1.255400000  | -1.456700000 |
| O | -3.654000000 | -1.258600000 | 1.542900000  |
| O | -2.127300000 | -2.310200000 | 2.835700000  |
| O | 1.970300000  | -2.521800000 | 2.683600000  |
| O | 2.090000000  | -2.742700000 | -2.140600000 |
| O | 3.548200000  | -1.286100000 | 1.640800000  |
| O | 3.614200000  | -1.448400000 | -1.083700000 |

|    |              |              |              |
|----|--------------|--------------|--------------|
| O  | 3.557200000  | 1.485700000  | 1.438500000  |
| O  | 3.591800000  | 1.320300000  | -1.285300000 |
| O  | 2.046400000  | 2.547800000  | -2.386400000 |
| O  | 1.986500000  | 2.771300000  | 2.435700000  |
| O  | -2.020200000 | -2.554500000 | -2.444700000 |
| O  | -3.604000000 | -1.474700000 | -1.248400000 |
| O  | -2.134300000 | 2.562400000  | 2.592300000  |
| O  | -2.045100000 | 2.316700000  | -2.694300000 |
| H  | -1.979118000 | -2.843510000 | 0.231299000  |
| H  | -1.035787000 | 1.828972000  | 4.288193000  |
| H  | -0.135833000 | 0.527886000  | 4.144062000  |
| H  | -0.620748000 | 1.196436000  | -4.456463000 |
| H  | -0.008884000 | 4.071587000  | -0.444007000 |
| H  | 0.649301000  | 4.483624000  | 1.587762000  |
| H  | 0.910327000  | 4.214403000  | -1.726359000 |
| H  | 1.866799000  | 0.176282000  | 2.985051000  |
| H  | -1.959284000 | 2.884739000  | -0.107507000 |
| H  | -0.814771000 | -1.479134000 | 4.559711000  |
| H  | -0.735261000 | -1.716390000 | -4.126167000 |
| H  | 0.847804000  | -4.174973000 | 1.930154000  |
| H  | 0.780703000  | -4.446044000 | -1.268509000 |
| H  | -0.032365000 | -4.021060000 | 0.617501000  |
| O  | -1.119073000 | 0.125452000  | 1.535501000  |
| O  | -0.021609000 | -3.887212000 | 1.622580000  |
| O  | 1.036185000  | 1.505982000  | 0.012157000  |
| O  | 1.313548000  | 0.162896000  | 2.196828000  |
| O  | -0.078554000 | -1.079184000 | 4.085028000  |
| O  | -0.158635000 | 1.535850000  | 4.009631000  |
| O  | 0.132714000  | -1.769189000 | -3.711337000 |
| O  | 1.048027000  | -1.468599000 | 0.227836000  |
| O  | -1.424783000 | -2.056035000 | 0.225226000  |
| O  | -0.032905000 | -3.998595000 | -1.016815000 |
| O  | -0.080347000 | 3.996154000  | 1.190578000  |
| O  | 0.027422000  | 3.930793000  | -1.447358000 |
| O  | -1.420614000 | 2.087236000  | -0.063790000 |
| O  | 0.212564000  | 1.243782000  | -3.974733000 |
| O  | 1.388404000  | -0.126394000 | -2.007392000 |
| O  | -1.100147000 | -0.087762000 | -1.428886000 |
| Zr | 2.477078000  | 0.010308000  | 0.118880000  |
| Zr | -0.087225000 | -1.606698000 | 2.042974000  |
| Zr | -0.042901000 | 1.962700000  | 1.742298000  |
| Zr | -0.009466000 | 1.620492000  | -1.800459000 |
| Zr | -2.562169000 | 0.003338000  | 0.042917000  |
| Zr | 0.007166000  | -1.927083000 | -1.536152000 |
| N  | 2.785952000  | 4.341769000  | -4.096615000 |
| H  | 2.112237000  | 3.592864000  | -4.029517000 |
| H  | 2.770869000  | 4.823328000  | -4.982619000 |
| N  | -2.738937000 | 4.199710000  | -4.337807000 |
| H  | -2.624232000 | 5.126548000  | -4.714076000 |
| H  | -1.982848000 | 3.866694000  | -3.761540000 |
| N  | -2.697956000 | -4.552435000 | -3.976649000 |
| H  | -1.951698000 | -4.190865000 | -3.402481000 |
| H  | -2.578792000 | -5.499232000 | -4.297859000 |
| N  | 2.835589000  | -4.517795000 | -3.837508000 |
| H  | 2.741975000  | -5.426117000 | -4.264978000 |
| H  | 2.058042000  | -4.229842000 | -3.263422000 |

|    |             |              |              |
|----|-------------|--------------|--------------|
| Fe | 1.525199000 | -0.292148000 | -3.890945000 |
| O  | 2.423269000 | -1.588237000 | -5.000198000 |
| C  | 4.125907000 | 0.186386000  | -5.029767000 |
| C  | 5.395351000 | 0.002789000  | -4.238069000 |
| H  | 3.660349000 | -0.931732000 | -5.244750000 |
| H  | 4.257427000 | 0.578622000  | -6.054055000 |
| H  | 5.959538000 | 0.941626000  | -4.194834000 |
| H  | 5.157622000 | -0.293912000 | -3.211851000 |
| H  | 6.036995000 | -0.759894000 | -4.689745000 |
| O  | 3.090690000 | 0.738111000  | -4.389042000 |
| H  | 2.349572000 | -2.541693000 | -4.801375000 |

Fe-NU-1000-NH<sub>2</sub> (Prod\_4)

Free Energy: -4509.19791

Electronic Energy: -4509.5428187

|   |              |              |              |
|---|--------------|--------------|--------------|
| C | 5.726500000  | -2.889200000 | -2.160200000 |
| C | -5.638900000 | -2.885100000 | -2.451400000 |
| C | 4.388900000  | -3.187700000 | -2.460000000 |
| C | -4.293000000 | -3.161900000 | -2.734600000 |
| C | 4.106400000  | -4.252600000 | -3.328500000 |
| C | -3.986000000 | -4.236300000 | -3.582700000 |
| C | 5.138200000  | -5.020700000 | -3.859400000 |
| C | -4.998200000 | -5.035200000 | -4.107600000 |
| C | 6.482800000  | -4.751200000 | -3.537700000 |
| C | -6.351100000 | -4.782200000 | -3.807100000 |
| C | 6.755800000  | -3.657500000 | -2.694900000 |
| C | -6.649700000 | -3.679700000 | -2.983400000 |
| C | 5.673400000  | 2.762000000  | -2.369400000 |
| C | -5.668800000 | 2.628900000  | -2.684600000 |
| C | 4.341400000  | 3.021300000  | -2.724800000 |
| C | -4.324800000 | 2.872000000  | -3.008000000 |
| C | 4.069900000  | 4.017800000  | -3.673300000 |
| C | -4.019400000 | 3.907100000  | -3.904900000 |
| C | 5.105900000  | 4.760700000  | -4.231200000 |
| C | -5.033000000 | 4.692700000  | -4.448900000 |
| C | 6.444700000  | 4.526400000  | -3.861700000 |
| C | -6.384200000 | 4.462600000  | -4.123400000 |
| C | 6.708200000  | 3.500400000  | -2.934600000 |
| C | -6.680500000 | 3.408600000  | -3.237600000 |
| C | -3.223400000 | -2.332300000 | -2.105800000 |
| C | -3.315200000 | -2.089500000 | 2.441200000  |
| C | -3.322900000 | 2.330100000  | 2.211500000  |
| C | 3.188500000  | 2.437000000  | 2.193700000  |
| C | 3.242000000  | 2.242000000  | -2.086000000 |
| C | 3.280300000  | -2.402400000 | -1.851700000 |
| C | -3.245500000 | 2.084800000  | -2.346700000 |
| C | 3.174600000  | -2.211100000 | 2.426600000  |
| H | 5.937000000  | -2.056700000 | -1.495800000 |
| H | -5.871700000 | -2.048200000 | -1.800500000 |
| H | 4.900900000  | -5.847200000 | -4.524400000 |
| H | -4.737200000 | -5.873100000 | -4.749000000 |
| H | 7.786000000  | -3.416500000 | -2.445100000 |
| H | -7.686200000 | -3.452500000 | -2.747200000 |
| H | 5.874800000  | 1.981600000  | -1.642500000 |
| H | -5.899000000 | 1.830200000  | -1.986300000 |
| H | 4.876900000  | 5.534100000  | -4.959800000 |

|   |              |              |              |
|---|--------------|--------------|--------------|
| H | -4.774300000 | 5.498300000  | -5.131200000 |
| H | 7.734600000  | 3.290500000  | -2.644500000 |
| H | -7.714900000 | 3.205600000  | -2.972200000 |
| H | -7.139900000 | -5.409200000 | -4.210200000 |
| H | 7.286100000  | -5.356800000 | -3.944800000 |
| H | -7.172900000 | 5.077500000  | -4.544800000 |
| H | 7.252000000  | 5.109100000  | -4.293600000 |
| H | -4.101094000 | -2.666618000 | 2.881887000  |
| H | 3.964843000  | 3.004750000  | 2.662583000  |
| H | -4.111859000 | 2.914440000  | 2.636930000  |
| H | 3.948377000  | -2.768397000 | 2.911976000  |
| O | -3.663700000 | 1.472100000  | 1.337400000  |
| O | -3.610000000 | 1.255400000  | -1.456700000 |
| O | -3.654000000 | -1.258600000 | 1.542900000  |
| O | -2.127300000 | -2.310200000 | 2.835700000  |
| O | 1.970300000  | -2.521800000 | 2.683600000  |
| O | 2.090000000  | -2.742700000 | -2.140600000 |
| O | 3.548200000  | -1.286100000 | 1.640800000  |
| O | 3.614200000  | -1.448400000 | -1.083700000 |
| O | 3.557200000  | 1.485700000  | 1.438500000  |
| O | 3.591800000  | 1.320300000  | -1.285300000 |
| O | 2.046400000  | 2.547800000  | -2.386400000 |
| O | 1.986500000  | 2.771300000  | 2.435700000  |
| O | -2.020200000 | -2.554500000 | -2.444700000 |
| O | -3.604000000 | -1.474700000 | -1.248400000 |
| O | -2.134300000 | 2.562400000  | 2.592300000  |
| O | -2.045100000 | 2.316700000  | -2.694300000 |
| H | -1.981217000 | -2.833168000 | 0.206130000  |
| H | -1.041026000 | 1.811637000  | 4.291238000  |
| H | -0.135943000 | 0.513730000  | 4.140928000  |
| H | -0.613322000 | 1.553784000  | -4.483668000 |
| H | -0.010920000 | 4.077364000  | -0.420904000 |
| H | 0.649518000  | 4.479730000  | 1.611164000  |
| H | 0.916551000  | 4.228310000  | -1.690999000 |
| H | 1.877364000  | 0.162265000  | 2.965577000  |
| H | -1.964904000 | 2.881490000  | -0.108066000 |
| H | -0.820431000 | -1.484418000 | 4.548772000  |
| H | 0.933584000  | -2.678804000 | -4.018510000 |
| H | 0.844422000  | -4.176018000 | 1.894364000  |
| H | 0.847519000  | -4.370006000 | -1.233464000 |
| H | -0.036777000 | -3.997811000 | 0.582961000  |
| O | -1.117266000 | 0.124446000  | 1.527781000  |
| O | -0.026101000 | -3.885808000 | 1.592904000  |
| O | 1.040232000  | 1.529964000  | 0.024627000  |
| O | 1.309274000  | 0.157544000  | 2.188016000  |
| O | -0.080552000 | -1.086893000 | 4.077918000  |
| O | -0.161918000 | 1.523928000  | 4.013585000  |
| O | 0.232640000  | -2.038218000 | -3.835963000 |
| O | 1.038969000  | -1.479935000 | 0.211460000  |
| O | -1.425897000 | -2.046561000 | 0.214657000  |
| O | -0.006476000 | -3.968920000 | -1.045738000 |
| O | -0.089148000 | 4.003101000  | 1.217463000  |
| O | 0.032005000  | 3.943317000  | -1.423665000 |
| O | -1.423769000 | 2.086320000  | -0.056957000 |
| O | 0.205210000  | 1.504496000  | -3.975369000 |
| O | 1.314777000  | -0.101228000 | -2.035950000 |

|    |              |              |              |
|----|--------------|--------------|--------------|
| O  | -1.143243000 | -0.090625000 | -1.460541000 |
| Zr | 2.440320000  | 0.008662000  | 0.106820000  |
| Zr | -0.092594000 | -1.611119000 | 2.031298000  |
| Zr | -0.047030000 | 1.964959000  | 1.750003000  |
| Zr | -0.016304000 | 1.615166000  | -1.788690000 |
| Zr | -2.569727000 | -0.001343000 | 0.037875000  |
| Zr | 0.001901000  | -1.886594000 | -1.582406000 |
| N  | 2.788919000  | 4.353163000  | -4.083531000 |
| H  | 2.075475000  | 3.650618000  | -3.958022000 |
| H  | 2.749287000  | 4.856265000  | -4.955358000 |
| N  | -2.736337000 | 4.200209000  | -4.335928000 |
| H  | -2.624103000 | 5.131847000  | -4.701712000 |
| H  | -1.985608000 | 3.873536000  | -3.747794000 |
| N  | -2.699963000 | -4.543804000 | -3.982928000 |
| H  | -1.950602000 | -4.117087000 | -3.457739000 |
| H  | -2.559897000 | -5.496918000 | -4.273702000 |
| N  | 2.832939000  | -4.585985000 | -3.769938000 |
| H  | 2.758300000  | -5.519482000 | -4.142758000 |
| H  | 2.078144000  | -4.304928000 | -3.164872000 |
| Fe | 1.162866000  | -0.244536000 | -4.065767000 |
| O  | 0.253263000  | -0.612849000 | -6.142228000 |
| C  | 4.100395000  | -1.141391000 | -4.693171000 |
| C  | 4.892786000  | -0.124513000 | -3.974174000 |
| H  | 4.618194000  | -1.978001000 | -5.193567000 |
| H  | 0.896822000  | -0.990746000 | -6.750232000 |
| H  | 4.706774000  | 0.868194000  | -4.403133000 |
| H  | 4.558555000  | -0.068159000 | -2.927807000 |
| H  | 5.962692000  | -0.334323000 | -4.006032000 |
| O  | 2.864339000  | -1.101175000 | -4.779231000 |
| H  | -0.214367000 | -1.377835000 | -5.762581000 |

Fe-NU-1000-NO<sub>2</sub>-O

Free Energy: -4950.74742

Electronic Energy: -4950.947371

|   |              |              |              |
|---|--------------|--------------|--------------|
| C | 5.726500000  | -2.889200000 | -2.160200000 |
| C | -5.638900000 | -2.885100000 | -2.451400000 |
| C | 4.388900000  | -3.187700000 | -2.460000000 |
| C | -4.293000000 | -3.161900000 | -2.734600000 |
| C | 4.106400000  | -4.252600000 | -3.328500000 |
| C | -3.986000000 | -4.236300000 | -3.582700000 |
| C | 5.138200000  | -5.020700000 | -3.859400000 |
| C | -4.998200000 | -5.035200000 | -4.107600000 |
| C | 6.482800000  | -4.751200000 | -3.537700000 |
| C | -6.351100000 | -4.782200000 | -3.807100000 |
| C | 6.755800000  | -3.657500000 | -2.694900000 |
| C | -6.649700000 | -3.679700000 | -2.983400000 |
| C | 5.673400000  | 2.762000000  | -2.369400000 |
| C | -5.668800000 | 2.628900000  | -2.684600000 |
| C | 4.341400000  | 3.021300000  | -2.724800000 |
| C | -4.324800000 | 2.872000000  | -3.008000000 |
| C | 4.069900000  | 4.017800000  | -3.673300000 |
| C | -4.019400000 | 3.907100000  | -3.904900000 |
| C | 5.105900000  | 4.760700000  | -4.231200000 |
| C | -5.033000000 | 4.692700000  | -4.448900000 |
| C | 6.444700000  | 4.526400000  | -3.861700000 |
| C | -6.384200000 | 4.462600000  | -4.123400000 |

|   |              |              |              |
|---|--------------|--------------|--------------|
| C | 6.708200000  | 3.500400000  | -2.934600000 |
| C | -6.680500000 | 3.408600000  | -3.237600000 |
| C | -3.223400000 | -2.332300000 | -2.105800000 |
| C | -3.315200000 | -2.089500000 | 2.441200000  |
| C | -3.322900000 | 2.330100000  | 2.211500000  |
| C | 3.188500000  | 2.437000000  | 2.193700000  |
| C | 3.242000000  | 2.242000000  | -2.086000000 |
| C | 3.280300000  | -2.402400000 | -1.851700000 |
| C | -3.245500000 | 2.084800000  | -2.346700000 |
| C | 3.174600000  | -2.211100000 | 2.426600000  |
| H | 5.937000000  | -2.056700000 | -1.495800000 |
| H | -5.871700000 | -2.048200000 | -1.800500000 |
| H | 4.900900000  | -5.847200000 | -4.524400000 |
| H | -4.737200000 | -5.873100000 | -4.749000000 |
| H | 7.786000000  | -3.416500000 | -2.445100000 |
| H | -7.686200000 | -3.452500000 | -2.747200000 |
| H | 5.874800000  | 1.981600000  | -1.642500000 |
| H | -5.899000000 | 1.830200000  | -1.986300000 |
| H | 4.876900000  | 5.534100000  | -4.959800000 |
| H | -4.774300000 | 5.498300000  | -5.131200000 |
| H | 7.734600000  | 3.290500000  | -2.644500000 |
| H | -7.714900000 | 3.205600000  | -2.972200000 |
| H | -7.139900000 | -5.409200000 | -4.210200000 |
| H | 7.286100000  | -5.356800000 | -3.944800000 |
| H | -7.172900000 | 5.077500000  | -4.544800000 |
| H | 7.252000000  | 5.109100000  | -4.293600000 |
| H | -4.101094000 | -2.666618000 | 2.881887000  |
| H | 3.964843000  | 3.004750000  | 2.662583000  |
| H | -4.111859000 | 2.914440000  | 2.636930000  |
| H | 3.948377000  | -2.768397000 | 2.911976000  |
| O | -3.663700000 | 1.472100000  | 1.337400000  |
| O | -3.610000000 | 1.255400000  | -1.456700000 |
| O | -3.654000000 | -1.258600000 | 1.542900000  |
| O | -2.127300000 | -2.310200000 | 2.835700000  |
| O | 1.970300000  | -2.521800000 | 2.683600000  |
| O | 2.090000000  | -2.742700000 | -2.140600000 |
| O | 3.548200000  | -1.286100000 | 1.640800000  |
| O | 3.614200000  | -1.448400000 | -1.083700000 |
| O | 3.557200000  | 1.485700000  | 1.438500000  |
| O | 3.591800000  | 1.320300000  | -1.285300000 |
| O | 2.046400000  | 2.547800000  | -2.386400000 |
| O | 1.986500000  | 2.771300000  | 2.435700000  |
| O | -2.020200000 | -2.554501000 | -2.444701000 |
| O | -3.604000000 | -1.474700000 | -1.248400000 |
| O | -2.134300000 | 2.562400000  | 2.592300000  |
| O | -2.045099000 | 2.316700000  | -2.694300000 |
| H | -1.948844000 | -2.860111000 | 0.219745000  |
| H | -1.024182000 | 1.826082000  | 4.287089000  |
| H | -0.131583000 | 0.520617000  | 4.131912000  |
| H | -0.019687000 | 1.815613000  | -4.760975000 |
| H | 0.004656000  | 4.100820000  | -0.460481000 |
| H | 0.659987000  | 4.480719000  | 1.601016000  |
| H | 0.637341000  | 4.422466000  | -1.903794000 |
| H | 1.872610000  | 0.167263000  | 2.970793000  |
| H | -1.945016000 | 2.895409000  | -0.111038000 |
| H | -0.810716000 | -1.483689000 | 4.548523000  |

|    |              |              |              |
|----|--------------|--------------|--------------|
| H  | 0.399390000  | -2.554641000 | -4.425494000 |
| H  | 0.845042000  | -4.203511000 | 1.936801000  |
| H  | 0.514985000  | -4.577246000 | -1.477467000 |
| H  | 0.006229000  | -4.039018000 | 0.596462000  |
| O  | -1.113524000 | 0.122009000  | 1.536641000  |
| O  | -0.005382000 | -3.890195000 | 1.604015000  |
| O  | 1.034599000  | 1.501366000  | -0.001415000 |
| O  | 1.316687000  | 0.157183000  | 2.184218000  |
| O  | -0.075153000 | -1.086009000 | 4.070869000  |
| O  | -0.150827000 | 1.529221000  | 4.000735000  |
| O  | 0.227237000  | -1.826116000 | -3.813348000 |
| O  | 1.040328000  | -1.458111000 | 0.198456000  |
| O  | -1.418071000 | -2.055777000 | 0.219147000  |
| O  | -0.044059000 | -3.958712000 | -0.992892000 |
| O  | -0.068581000 | 3.994559000  | 1.200417000  |
| O  | -0.055581000 | 3.920313000  | -1.448955000 |
| O  | -1.421956000 | 2.087287000  | -0.062234000 |
| O  | 0.193515000  | 1.299970000  | -3.976462000 |
| O  | 1.327908000  | -0.113410000 | -2.090959000 |
| O  | -1.099893000 | -0.090063000 | -1.432595000 |
| Zr | 2.463028000  | 0.005505000  | 0.124429000  |
| Zr | -0.083441000 | -1.621401000 | 2.032325000  |
| Zr | -0.039016000 | 1.966604000  | 1.737651000  |
| Zr | -0.029366000 | 1.646454000  | -1.812000000 |
| Zr | -2.542396000 | -0.000874000 | 0.050614000  |
| Zr | 0.008542000  | -1.947345000 | -1.570335000 |
| N  | 2.692650000  | 4.397811000  | -4.037016000 |
| N  | -2.642319000 | 4.221178000  | -4.328832000 |
| N  | -2.600553000 | -4.613926000 | -3.917411000 |
| N  | 2.730688000  | -4.628897000 | -3.701060000 |
| O  | -2.136973000 | -4.152655000 | -4.952730000 |
| O  | -2.058503000 | -5.412391000 | -3.165702000 |
| O  | 2.203626000  | -5.509484000 | -3.030806000 |
| O  | 2.246804000  | -4.075893000 | -4.680121000 |
| O  | -2.188145000 | 3.566760000  | -5.259189000 |
| O  | -2.095752000 | 5.156519000  | -3.760485000 |
| O  | 2.127021000  | 5.186902000  | -3.281340000 |
| O  | 2.244403000  | 3.951687000  | -5.080722000 |
| Fe | 1.272901000  | -0.272419000 | -3.953589000 |
| O  | 2.050198000  | -0.375168000 | -5.373793000 |

Fe-NU-1000-NO<sub>2</sub> (Ads\_4)

Free Energy: -5105.729051

Electronic Energy: -5106.0095965

|   |              |              |              |
|---|--------------|--------------|--------------|
| C | 5.726500000  | -2.889200000 | -2.160200000 |
| C | -5.638900000 | -2.885099000 | -2.451401000 |
| C | 4.388901000  | -3.187701000 | -2.459999000 |
| C | -4.292996000 | -3.161898000 | -2.734601000 |
| C | 4.106398000  | -4.252600000 | -3.328501000 |
| C | -3.986007000 | -4.236299000 | -3.582698000 |
| C | 5.138201000  | -5.020699000 | -3.859400000 |
| C | -4.998197000 | -5.035203000 | -4.107602000 |
| C | 6.482800000  | -4.751200000 | -3.537701000 |
| C | -6.351100000 | -4.782201000 | -3.807099000 |
| C | 6.755800000  | -3.657500000 | -2.694900000 |
| C | -6.649700000 | -3.679700000 | -2.983400000 |

|   |              |              |              |
|---|--------------|--------------|--------------|
| C | 5.673398000  | 2.762021000  | -2.369377000 |
| C | -5.668800000 | 2.628898000  | -2.684602000 |
| C | 4.341386000  | 3.021279000  | -2.724818000 |
| C | -4.324796000 | 2.871995000  | -3.008004000 |
| C | 4.069911000  | 4.017822000  | -3.673477000 |
| C | -4.019407000 | 3.907098000  | -3.904898000 |
| C | 5.105904000  | 4.760729000  | -4.231154000 |
| C | -5.032997000 | 4.692703000  | -4.448901000 |
| C | 6.444697000  | 4.526426000  | -3.861672000 |
| C | -6.384200000 | 4.462602000  | -4.123398000 |
| C | 6.708200000  | 3.500400000  | -2.934600000 |
| C | -6.680500000 | 3.408600000  | -3.237600000 |
| C | -3.223402000 | -2.332303000 | -2.105802000 |
| C | -3.315201000 | -2.089499000 | 2.441200000  |
| C | -3.322899000 | 2.330097000  | 2.211502000  |
| C | 3.188498000  | 2.436999000  | 2.193702000  |
| C | 3.242001000  | 2.242003000  | -2.085995000 |
| C | 3.280299000  | -2.402401000 | -1.851692000 |
| C | -3.245500000 | 2.084795000  | -2.346702000 |
| C | 3.174599000  | -2.211101000 | 2.426598000  |
| H | 5.937000000  | -2.056700000 | -1.495800000 |
| H | -5.871700000 | -2.048200000 | -1.800500000 |
| H | 4.900900000  | -5.847200000 | -4.524399000 |
| H | -4.737200000 | -5.873099000 | -4.749001000 |
| H | 7.786000000  | -3.416500000 | -2.445100000 |
| H | -7.686200000 | -3.452500000 | -2.747200000 |
| H | 5.874800000  | 1.981600000  | -1.642500000 |
| H | -5.899000000 | 1.830200000  | -1.986300000 |
| H | 4.876901000  | 5.534094000  | -4.959807000 |
| H | -4.774300000 | 5.498299000  | -5.131202000 |
| H | 7.734600000  | 3.290500000  | -2.644500000 |
| H | -7.714900000 | 3.205600000  | -2.972200000 |
| H | -7.139900000 | -5.409200000 | -4.210200000 |
| H | 7.286100000  | -5.356800000 | -3.944800000 |
| H | -7.172900000 | 5.077500000  | -4.544800000 |
| H | 7.252000000  | 5.109100000  | -4.293600000 |
| H | -4.101095000 | -2.666617000 | 2.881888000  |
| H | 3.964843000  | 3.004751000  | 2.662583000  |
| H | -4.111859000 | 2.914440000  | 2.636930000  |
| H | 3.948377000  | -2.768396000 | 2.911977000  |
| O | -3.663691000 | 1.472104000  | 1.337405000  |
| O | -3.609996000 | 1.255399000  | -1.456698000 |
| O | -3.654006000 | -1.258597000 | 1.542902000  |
| O | -2.127309000 | -2.310197000 | 2.835694000  |
| O | 1.970295000  | -2.521806000 | 2.683601000  |
| O | 2.089987000  | -2.742705000 | -2.140588000 |
| O | 3.548196000  | -1.286120000 | 1.640813000  |
| O | 3.614207000  | -1.448424000 | -1.083692000 |
| O | 3.557206000  | 1.485680000  | 1.438511000  |
| O | 3.591823000  | 1.320280000  | -1.285287000 |
| O | 2.046395000  | 2.547834000  | -2.386389000 |
| O | 1.986504000  | 2.771306000  | 2.435713000  |
| O | -2.020212000 | -2.554525000 | -2.444708000 |
| O | -3.604005000 | -1.474697000 | -1.248397000 |
| O | -2.134296000 | 2.562397000  | 2.592313000  |
| O | -2.045088000 | 2.316711000  | -2.694295000 |



|    |              |              |              |
|----|--------------|--------------|--------------|
| H  | -1.940625000 | -2.860006000 | 0.219967000  |
| H  | -1.031335000 | 1.820431000  | 4.272928000  |
| H  | -0.132148000 | 0.519702000  | 4.126317000  |
| H  | -0.278653000 | 1.738843000  | -4.735757000 |
| H  | 0.006245000  | 4.090078000  | -0.471723000 |
| H  | 0.664852000  | 4.475886000  | 1.600169000  |
| H  | 0.626183000  | 4.411136000  | -1.914927000 |
| H  | 1.872227000  | 0.167289000  | 2.972660000  |
| H  | -1.935887000 | 2.894521000  | -0.113545000 |
| H  | -0.815564000 | -1.484747000 | 4.539380000  |
| H  | -0.349952000 | -2.314500000 | -4.451041000 |
| H  | 0.852671000  | -4.194933000 | 1.913589000  |
| H  | 0.524096000  | -4.546725000 | -1.481897000 |
| H  | 0.010152000  | -4.021730000 | 0.570615000  |
| O  | -1.115032000 | 0.122592000  | 1.543361000  |
| O  | -0.000262000 | -3.884784000 | 1.584983000  |
| O  | 1.041558000  | 1.496400000  | -0.003540000 |
| O  | 1.318579000  | 0.156992000  | 2.184741000  |
| O  | -0.074208000 | -1.089985000 | 4.068411000  |
| O  | -0.152584000 | 1.528509000  | 3.997919000  |
| O  | 0.162965000  | -1.864264000 | -3.769883000 |
| O  | 1.044653000  | -1.448642000 | 0.193828000  |
| O  | -1.418967000 | -2.050061000 | 0.220688000  |
| O  | -0.055122000 | -3.946874000 | -1.000324000 |
| O  | -0.066416000 | 3.994278000  | 1.199259000  |
| O  | -0.063105000 | 3.910061000  | -1.458055000 |
| O  | -1.420181000 | 2.082319000  | -0.059087000 |
| O  | 0.189733000  | 1.389425000  | -3.969583000 |
| O  | 1.263166000  | -0.111581000 | -2.168762000 |
| O  | -1.137594000 | -0.091893000 | -1.427193000 |
| Zr | 2.459868000  | 0.003791000  | 0.117906000  |
| Zr | -0.081200000 | -1.619725000 | 2.025843000  |
| Zr | -0.036006000 | 1.963997000  | 1.730569000  |
| Zr | -0.028871000 | 1.615667000  | -1.821967000 |
| Zr | -2.546891000 | 0.001654000  | 0.058073000  |
| Zr | 0.000371000  | -1.914992000 | -1.584851000 |
| N  | 2.697193000  | 4.315926000  | -4.118348000 |
| N  | -2.643041000 | 4.211765000  | -4.337754000 |
| N  | -2.602863000 | -4.573539000 | -3.966050000 |
| N  | 2.762302000  | -4.481390000 | -3.880940000 |
| O  | -2.127531000 | -3.960963000 | -4.916717000 |
| O  | -2.071134000 | -5.484539000 | -3.349122000 |
| O  | 2.125410000  | -5.439904000 | -3.477085000 |
| O  | 2.428032000  | -3.723632000 | -4.794330000 |
| O  | -2.186597000 | 3.529425000  | -5.247513000 |
| O  | -2.100369000 | 5.166658000  | -3.800167000 |
| O  | 2.095838000  | 5.194077000  | -3.505118000 |
| O  | 2.293826000  | 3.704389000  | -5.095533000 |
| Fe | 1.134928000  | -0.264192000 | -4.139314000 |
| O  | 1.079465000  | -0.316702000 | -5.770766000 |
| C  | 3.986074000  | -0.014476000 | -4.932505000 |
| C  | 5.432291000  | -0.248682000 | -4.588441000 |
| H  | 3.764248000  | -0.125580000 | -5.998604000 |
| H  | 3.663911000  | 0.993600000  | -4.643402000 |
| H  | 5.581999000  | -0.137447000 | -3.510324000 |
| H  | 5.754088000  | -1.255294000 | -4.877086000 |

|   |             |              |              |
|---|-------------|--------------|--------------|
| H | 6.069537000 | 0.475023000  | -5.105477000 |
| O | 3.145751000 | -0.916763000 | -4.171961000 |
| H | 3.086599000 | -1.778102000 | -4.629762000 |

Fe-NU-1000-NO<sub>2</sub> (TS1\_4)

Free Energy: -5105.711015

Electronic Energy: -5105.9844341

|   |              |              |              |
|---|--------------|--------------|--------------|
| C | 5.726500000  | -2.889200000 | -2.160200000 |
| C | -5.638900000 | -2.885100000 | -2.451400000 |
| C | 4.388900000  | -3.187700000 | -2.460000000 |
| C | -4.293000000 | -3.161900000 | -2.734600000 |
| C | 4.106400000  | -4.252600000 | -3.328500000 |
| C | -3.986000000 | -4.236300000 | -3.582700000 |
| C | 5.138200000  | -5.020700000 | -3.859400000 |
| C | -4.998200000 | -5.035200000 | -4.107600000 |
| C | 6.482800000  | -4.751200000 | -3.537700000 |
| C | -6.351100000 | -4.782200000 | -3.807100000 |
| C | 6.755800000  | -3.657500000 | -2.694900000 |
| C | -6.649700000 | -3.679700000 | -2.983400000 |
| C | 5.673400000  | 2.762000000  | -2.369400000 |
| C | -5.668800000 | 2.628900000  | -2.684600000 |
| C | 4.341400000  | 3.021300000  | -2.724800000 |
| C | -4.324800000 | 2.872000000  | -3.008000000 |
| C | 4.069900000  | 4.017800000  | -3.673300000 |
| C | -4.019400000 | 3.907100000  | -3.904900000 |
| C | 5.105900000  | 4.760700000  | -4.231200000 |
| C | -5.033000000 | 4.692700000  | -4.448900000 |
| C | 6.444700000  | 4.526400000  | -3.861700000 |
| C | -6.384200000 | 4.462600000  | -4.123400000 |
| C | 6.708200000  | 3.500400000  | -2.934600000 |
| C | -6.680500000 | 3.408600000  | -3.237600000 |
| C | -3.223400000 | -2.332300000 | -2.105800000 |
| C | -3.315200000 | -2.089500000 | 2.441200000  |
| C | -3.322900000 | 2.330100000  | 2.211500000  |
| C | 3.188500000  | 2.437000000  | 2.193700000  |
| C | 3.242000000  | 2.242000000  | -2.086000000 |
| C | 3.280300000  | -2.402400000 | -1.851700000 |
| C | -3.245500000 | 2.084800000  | -2.346700000 |
| C | 3.174600000  | -2.211100000 | 2.426600000  |
| H | 5.937000000  | -2.056700000 | -1.495800000 |
| H | -5.871700000 | -2.048200000 | -1.800500000 |
| H | 4.900900000  | -5.847200000 | -4.524400000 |
| H | -4.737200000 | -5.873100000 | -4.749000000 |
| H | 7.786000000  | -3.416500000 | -2.445100000 |
| H | -7.686200000 | -3.452500000 | -2.747200000 |
| H | 5.874800000  | 1.981600000  | -1.642500000 |
| H | -5.899000000 | 1.830200000  | -1.986300000 |
| H | 4.876900000  | 5.534100000  | -4.959800000 |
| H | -4.774300000 | 5.498300000  | -5.131200000 |
| H | 7.734600000  | 3.290500000  | -2.644500000 |
| H | -7.714900000 | 3.205600000  | -2.972200000 |
| H | -7.139900000 | -5.409200000 | -4.210200000 |
| H | 7.286100000  | -5.356800000 | -3.944800000 |
| H | -7.172900000 | 5.077500000  | -4.544800000 |
| H | 7.252000000  | 5.109100000  | -4.293600000 |
| H | -4.101094000 | -2.666618000 | 2.881887000  |

|    |              |              |              |
|----|--------------|--------------|--------------|
| H  | 3.964843000  | 3.004750000  | 2.662583000  |
| H  | -4.111859000 | 2.914440000  | 2.636930000  |
| H  | 3.948377000  | -2.768397000 | 2.911976000  |
| O  | -3.663700000 | 1.472100000  | 1.337400000  |
| O  | -3.610000000 | 1.255400000  | -1.456700000 |
| O  | -3.654000000 | -1.258600000 | 1.542900000  |
| O  | -2.127300000 | -2.310200000 | 2.835700000  |
| O  | 1.970300000  | -2.521800000 | 2.683600000  |
| O  | 2.090000000  | -2.742700000 | -2.140600000 |
| O  | 3.548200000  | -1.286100000 | 1.640800000  |
| O  | 3.614200000  | -1.448400000 | -1.083700000 |
| O  | 3.557200000  | 1.485700000  | 1.438500000  |
| O  | 3.591800000  | 1.320300000  | -1.285300000 |
| O  | 2.046400000  | 2.547800000  | -2.386400000 |
| O  | 1.986500000  | 2.771300000  | 2.435700000  |
| O  | -2.020200000 | -2.554500000 | -2.444700000 |
| O  | -3.604000000 | -1.474700000 | -1.248400000 |
| O  | -2.134300000 | 2.562400000  | 2.592300000  |
| O  | -2.045100000 | 2.316700000  | -2.694300000 |
| H  | -1.940711000 | -2.856409000 | 0.217865000  |
| H  | -1.026292000 | 1.825408000  | 4.271514000  |
| H  | -0.133491000 | 0.520125000  | 4.121973000  |
| H  | -0.423424000 | 1.716180000  | -4.680978000 |
| H  | 0.012413000  | 4.112460000  | -0.471092000 |
| H  | 0.663681000  | 4.479477000  | 1.603818000  |
| H  | 0.636261000  | 4.425213000  | -1.920937000 |
| H  | 1.865879000  | 0.165561000  | 2.978731000  |
| H  | -1.938117000 | 2.902785000  | -0.102491000 |
| H  | -0.812808000 | -1.487672000 | 4.531811000  |
| H  | -0.248060000 | -2.241194000 | -4.513399000 |
| H  | 0.848192000  | -4.203324000 | 1.915200000  |
| H  | 0.515922000  | -4.557719000 | -1.491973000 |
| H  | 0.011327000  | -4.027045000 | 0.570172000  |
| O  | -1.113839000 | 0.124324000  | 1.539895000  |
| O  | 0.001810000  | -3.881513000 | 1.581076000  |
| O  | 1.044484000  | 1.483471000  | -0.009823000 |
| O  | 1.321608000  | 0.156520000  | 2.184080000  |
| O  | -0.074101000 | -1.089575000 | 4.059322000  |
| O  | -0.150251000 | 1.528655000  | 3.992707000  |
| O  | 0.159133000  | -1.773049000 | -3.775540000 |
| O  | 1.046072000  | -1.430796000 | 0.173232000  |
| O  | -1.414081000 | -2.049460000 | 0.213967000  |
| O  | -0.052701000 | -3.949096000 | -1.006036000 |
| O  | -0.061034000 | 3.992604000  | 1.197319000  |
| O  | -0.057266000 | 3.931026000  | -1.457054000 |
| O  | -1.418426000 | 2.092074000  | -0.062048000 |
| O  | 0.132453000  | 1.421767000  | -3.951063000 |
| O  | 1.312578000  | -0.103682000 | -2.225831000 |
| O  | -1.095326000 | -0.082413000 | -1.421859000 |
| Zr | 2.480734000  | 0.011712000  | 0.130263000  |
| Zr | -0.078962000 | -1.617486000 | 2.018844000  |
| Zr | -0.033534000 | 1.963895000  | 1.727869000  |
| Zr | -0.028624000 | 1.658343000  | -1.822081000 |
| Zr | -2.538549000 | 0.002092000  | 0.051530000  |
| Zr | 0.006054000  | -1.932211000 | -1.592351000 |
| N  | 2.693758000  | 4.399385000  | -4.042593000 |

|    |              |              |              |
|----|--------------|--------------|--------------|
| N  | -2.643892000 | 4.203117000  | -4.347071000 |
| N  | -2.602612000 | -4.581962000 | -3.958555000 |
| N  | 2.737862000  | -4.601477000 | -3.750379000 |
| O  | -2.128202000 | -3.993280000 | -4.923796000 |
| O  | -2.070603000 | -5.476628000 | -3.318174000 |
| O  | 2.176983000  | -5.492605000 | -3.122187000 |
| O  | 2.305039000  | -4.022198000 | -4.736747000 |
| O  | -2.199413000 | 3.511902000  | -5.256469000 |
| O  | -2.089908000 | 5.155565000  | -3.817668000 |
| O  | 2.120083000  | 5.174233000  | -5.276357000 |
| O  | 2.259437000  | 3.978532000  | -5.101060000 |
| Fe | 1.175834000  | -0.206514000 | -4.093638000 |
| O  | 1.134754000  | -0.284195000 | -5.806397000 |
| C  | 4.076949000  | -0.652515000 | -4.781448000 |
| C  | 5.284744000  | -0.191355000 | -4.008793000 |
| H  | 3.697796000  | -1.611708000 | -4.396236000 |
| H  | 4.335881000  | -0.835108000 | -5.834226000 |
| H  | 5.644485000  | 0.762958000  | -4.405199000 |
| H  | 5.037339000  | -0.054019000 | -2.950871000 |
| H  | 6.094190000  | -0.924021000 | -4.088265000 |
| O  | 3.052621000  | 0.340358000  | -4.735212000 |
| H  | 2.266075000  | 0.134240000  | -5.656395000 |

Fe-NU-1000-NO<sub>2</sub> (Int\_4)

Free Energy: -5105.746857

Electronic Energy: -5106.0244168

|   |              |              |              |
|---|--------------|--------------|--------------|
| C | 5.726500000  | -2.889200000 | -2.160200000 |
| C | -5.638900000 | -2.885100000 | -2.451400000 |
| C | 4.388900000  | -3.187700000 | -2.460000000 |
| C | -4.293000000 | -3.161900000 | -2.734600000 |
| C | 4.106400000  | -4.252600000 | -3.328500000 |
| C | -3.986000000 | -4.236300000 | -3.582700000 |
| C | 5.138200000  | -5.020700000 | -3.859400000 |
| C | -4.998200000 | -5.035200000 | -4.107600000 |
| C | 6.482800000  | -4.751200000 | -3.537700000 |
| C | -6.351100000 | -4.782200000 | -3.807100000 |
| C | 6.755800000  | -3.657500000 | -2.694900000 |
| C | -6.649700000 | -3.679700000 | -2.983400000 |
| C | 5.673400000  | 2.762000000  | -2.369400000 |
| C | -5.668800000 | 2.628900000  | -2.684600000 |
| C | 4.341400000  | 3.021300000  | -2.724800000 |
| C | -4.324800000 | 2.872000000  | -3.008000000 |
| C | 4.069900000  | 4.017800000  | -3.673300000 |
| C | -4.019400000 | 3.907100000  | -3.904900000 |
| C | 5.105900000  | 4.760700000  | -4.231200000 |
| C | -5.033000000 | 4.692700000  | -4.448900000 |
| C | 6.444700000  | 4.526400000  | -3.861700000 |
| C | -6.384200000 | 4.462600000  | -4.123400000 |
| C | 6.708200000  | 3.500400000  | -2.934600000 |
| C | -6.680500000 | 3.408600000  | -3.237600000 |
| C | -3.223400000 | -2.332300000 | -2.105800000 |
| C | -3.315200000 | -2.089500000 | 2.441200000  |
| C | -3.322900000 | 2.330100000  | 2.211500000  |
| C | 3.188500000  | 2.437000000  | 2.193700000  |
| C | 3.242000000  | 2.242000000  | -2.086000000 |
| C | 3.280300000  | -2.402400000 | -1.851700000 |

|   |              |              |              |
|---|--------------|--------------|--------------|
| C | -3.245500000 | 2.084800000  | -2.346700000 |
| C | 3.174600000  | -2.211100000 | 2.426600000  |
| H | 5.937000000  | -2.056700000 | -1.495800000 |
| H | -5.871700000 | -2.048200000 | -1.800500000 |
| H | 4.900900000  | -5.847200000 | -4.524400000 |
| H | -4.737200000 | -5.873100000 | -4.749000000 |
| H | 7.786000000  | -3.416500000 | -2.445100000 |
| H | -7.686200000 | -3.452500000 | -2.747200000 |
| H | 5.874800000  | 1.981600000  | -1.642500000 |
| H | -5.899000000 | 1.830200000  | -1.986300000 |
| H | 4.876900000  | 5.534100000  | -4.959800000 |
| H | -4.774300000 | 5.498300000  | -5.131200000 |
| H | 7.734600000  | 3.290500000  | -2.644500000 |
| H | -7.714900000 | 3.205600000  | -2.972200000 |
| H | -7.139900000 | -5.409200000 | -4.210200000 |
| H | 7.286100000  | -5.356800000 | -3.944800000 |
| H | -7.172900000 | 5.077500000  | -4.544800000 |
| H | 7.252000000  | 5.109100000  | -4.293600000 |
| H | -4.101094000 | -2.666618000 | 2.881887000  |
| H | 3.964843000  | 3.004750000  | 2.662583000  |
| H | -4.111859000 | 2.914440000  | 2.636930000  |
| H | 3.948377000  | -2.768397000 | 2.911976000  |
| O | -3.663700000 | 1.472100000  | 1.337400000  |
| O | -3.610000000 | 1.255400000  | -1.456700000 |
| O | -3.654000000 | -1.258600000 | 1.542900000  |
| O | -2.127300000 | -2.310200000 | 2.835700000  |
| O | 1.970300000  | -2.521800000 | 2.683600000  |
| O | 2.090000000  | -2.742700000 | -2.140600000 |
| O | 3.548200000  | -1.286100000 | 1.640800000  |
| O | 3.614200000  | -1.448400000 | -1.083700000 |
| O | 3.557200000  | 1.485700000  | 1.438500000  |
| O | 3.591800000  | 1.320300000  | -1.285300000 |
| O | 2.046400000  | 2.547800000  | -2.386400000 |
| O | 1.986500000  | 2.771300000  | 2.435700000  |
| O | -2.020200000 | -2.554500000 | -2.444700000 |
| O | -3.604000000 | -1.474700000 | -1.248400000 |
| O | -2.134300000 | 2.562400000  | 2.592300000  |
| O | -2.045100000 | 2.316700000  | -2.694300000 |
| H | -1.949465000 | -2.857996000 | 0.225550000  |
| H | -1.027016000 | 1.828121000  | 4.266806000  |
| H | -0.130628000 | 0.525560000  | 4.122658000  |
| H | -0.049553000 | 1.755994000  | -4.720578000 |
| H | 0.004749000  | 4.094368000  | -0.475137000 |
| H | 0.665307000  | 4.478877000  | 1.590356000  |
| H | 0.636457000  | 4.411929000  | -1.917852000 |
| H | 1.867846000  | 0.171265000  | 2.973270000  |
| H | -1.944535000 | 2.897170000  | -0.105281000 |
| H | -0.812148000 | -1.481443000 | 4.538248000  |
| H | 0.219648000  | -2.478251000 | -4.357528000 |
| H | 0.850946000  | -4.197792000 | 1.923424000  |
| H | 0.513106000  | -4.569140000 | -1.480856000 |
| H | 0.006769000  | -4.031695000 | 0.584523000  |
| O | -1.116014000 | 0.123498000  | 1.542021000  |
| O | -0.001354000 | -3.886557000 | 1.593803000  |
| O | 1.036164000  | 1.485867000  | -0.015038000 |
| O | 1.319860000  | 0.158609000  | 2.181302000  |

|    |              |              |              |
|----|--------------|--------------|--------------|
| O  | -0.072334000 | -1.086067000 | 4.065265000  |
| O  | -0.149283000 | 1.533408000  | 3.991225000  |
| O  | 0.169987000  | -1.720095000 | -3.761945000 |
| O  | 1.044385000  | -1.445854000 | 0.189529000  |
| O  | -1.420151000 | -2.052995000 | 0.221335000  |
| O  | -0.053250000 | -3.955136000 | -1.000406000 |
| O  | -0.062098000 | 3.993032000  | 1.187499000  |
| O  | -0.061579000 | 3.917468000  | -1.463690000 |
| O  | -1.421855000 | 2.088550000  | -0.065161000 |
| O  | 0.201076000  | 1.258601000  | -3.936274000 |
| O  | 1.328441000  | -0.123122000 | -2.120904000 |
| O  | -1.098776000 | -0.086835000 | -1.418979000 |
| Zr | 2.476262000  | 0.011018000  | 0.122551000  |
| Zr | -0.080070000 | -1.617583000 | 2.024919000  |
| Zr | -0.034624000 | 1.963499000  | 1.722614000  |
| Zr | -0.031596000 | 1.642850000  | -1.838564000 |
| Zr | -2.540350000 | 0.002104000  | 0.053739000  |
| Zr | 0.001515000  | -1.934220000 | -1.576089000 |
| N  | 2.693979000  | 4.351945000  | -4.079876000 |
| N  | -2.643003000 | 4.215823000  | -4.335383000 |
| N  | -2.598914000 | -4.595413000 | -3.933328000 |
| N  | 2.737548000  | -4.585781000 | -3.758853000 |
| O  | -2.123076000 | -4.066434000 | -4.931341000 |
| O  | -2.063609000 | -5.442833000 | -3.233256000 |
| O  | 2.182030000  | -5.509173000 | -3.176625000 |
| O  | 2.291571000  | -3.953134000 | -4.708861000 |
| O  | -2.190532000 | 3.548816000  | -5.257914000 |
| O  | -2.096365000 | 5.159518000  | -3.781679000 |
| O  | 2.102076000  | 5.180057000  | -3.389751000 |
| O  | 2.271505000  | 3.826382000  | -5.097726000 |
| Fe | 1.483088000  | -0.280224000 | -3.960233000 |
| O  | 1.459065000  | -0.516417000 | -5.745576000 |
| C  | 4.114239000  | -0.462304000 | -4.969043000 |
| C  | 5.489999000  | 0.134705000  | -4.757149000 |
| H  | 4.148351000  | -1.560336000 | -4.867980000 |
| H  | 3.738394000  | -0.248759000 | -5.979668000 |
| H  | 5.481877000  | 1.212433000  | -4.944643000 |
| H  | 5.822525000  | -0.026505000 | -3.726517000 |
| H  | 6.212524000  | -0.331301000 | -5.434185000 |
| O  | 3.245556000  | 0.082746000  | -4.006046000 |
| H  | 0.572063000  | -0.810974000 | -5.997617000 |

Fe-NU-1000-NO<sub>2</sub> (TS2\_4)

Free Energy: -5105.730684

Electronic Energy: -5106.0031756

|   |              |              |              |
|---|--------------|--------------|--------------|
| C | 5.726500000  | -2.889200000 | -2.160200000 |
| C | -5.638900000 | -2.885100000 | -2.451400000 |
| C | 4.388900000  | -3.187700000 | -2.460000000 |
| C | -4.293000000 | -3.161900000 | -2.734600000 |
| C | 4.106400000  | -4.252600000 | -3.328500000 |
| C | -3.986000000 | -4.236300000 | -3.582700000 |
| C | 5.138200000  | -5.020700000 | -3.859400000 |
| C | -4.998200000 | -5.035200000 | -4.107600000 |
| C | 6.482800000  | -4.751200000 | -3.537700000 |
| C | -6.351100000 | -4.782200000 | -3.807100000 |
| C | 6.755800000  | -3.657500000 | -2.694900000 |

|   |              |              |              |
|---|--------------|--------------|--------------|
| C | -6.649700000 | -3.679700000 | -2.983400000 |
| C | 5.673400000  | 2.762000000  | -2.369400000 |
| C | -5.668800000 | 2.628900000  | -2.684600000 |
| C | 4.341400000  | 3.021300000  | -2.724800000 |
| C | -4.324800000 | 2.872000000  | -3.008000000 |
| C | 4.069900000  | 4.017800000  | -3.673300000 |
| C | -4.019400000 | 3.907100000  | -3.904900000 |
| C | 5.105900000  | 4.760700000  | -4.231200000 |
| C | -5.033000000 | 4.692700000  | -4.448900000 |
| C | 6.444700000  | 4.526400000  | -3.861700000 |
| C | -6.384200000 | 4.462600000  | -4.123400000 |
| C | 6.708200000  | 3.500400000  | -2.934600000 |
| C | -6.680500000 | 3.408600000  | -3.237600000 |
| C | -3.223400000 | -2.332300000 | -2.105800000 |
| C | -3.315200000 | -2.089500000 | 2.441200000  |
| C | -3.322900000 | 2.330100000  | 2.211500000  |
| C | 3.188500000  | 2.437000000  | 2.193700000  |
| C | 3.242000000  | 2.242000000  | -2.086000000 |
| C | 3.280300000  | -2.402400000 | -1.851700000 |
| C | -3.245500000 | 2.084800000  | -2.346700000 |
| C | 3.174600000  | -2.211100000 | 2.426600000  |
| H | 5.937000000  | -2.056700000 | -1.495800000 |
| H | -5.871700000 | -2.048200000 | -1.800500000 |
| H | 4.900900000  | -5.847200000 | -4.524400000 |
| H | -4.737200000 | -5.873100000 | -4.749000000 |
| H | 7.786000000  | -3.416500000 | -2.445100000 |
| H | -7.686200000 | -3.452500000 | -2.747200000 |
| H | 5.874800000  | 1.981600000  | -1.642500000 |
| H | -5.899000000 | 1.830200000  | -1.986300000 |
| H | 4.876900000  | 5.534100000  | -4.959800000 |
| H | -4.774300000 | 5.498300000  | -5.131200000 |
| H | 7.734600000  | 3.290500000  | -2.644500000 |
| H | -7.714900000 | 3.205600000  | -2.972200000 |
| H | -7.139900000 | -5.409200000 | -4.210200000 |
| H | 7.286100000  | -5.356800000 | -3.944800000 |
| H | -7.172900000 | 5.077500000  | -4.544800000 |
| H | 7.252000000  | 5.109100000  | -4.293600000 |
| H | -4.101094000 | -2.666618000 | 2.881887000  |
| H | 3.964843000  | 3.004750000  | 2.662583000  |
| H | -4.111859000 | 2.914440000  | 2.636930000  |
| H | 3.948377000  | -2.768397000 | 2.911976000  |
| O | -3.663700000 | 1.472100000  | 1.337400000  |
| O | -3.610000000 | 1.255400000  | -1.456700000 |
| O | -3.654000000 | -1.258600000 | 1.542900000  |
| O | -2.127300000 | -2.310200000 | 2.835700000  |
| O | 1.970300000  | -2.521800000 | 2.683600000  |
| O | 2.090000000  | -2.742700000 | -2.140600000 |
| O | 3.548200000  | -1.286100000 | 1.640800000  |
| O | 3.614200000  | -1.448400000 | -1.083700000 |
| O | 3.557200000  | 1.485700000  | 1.438500000  |
| O | 3.591800000  | 1.320300000  | -1.285300000 |
| O | 2.046400000  | 2.547800000  | -2.386400000 |
| O | 1.986500000  | 2.771300000  | 2.435700000  |
| O | -2.020200000 | -2.554500000 | -2.444700000 |
| O | -3.604000000 | -1.474700000 | -1.248400000 |
| O | -2.134300000 | 2.562400000  | 2.592300000  |

|    |              |              |              |
|----|--------------|--------------|--------------|
| O  | -2.045100000 | 2.316700000  | -2.694300000 |
| H  | -1.949598000 | -2.855280000 | 0.228346000  |
| H  | -1.031761000 | 1.823598000  | 4.277795000  |
| H  | -0.129733000 | 0.525514000  | 4.131237000  |
| H  | -0.396672000 | 1.600254000  | -4.635131000 |
| H  | 0.002147000  | 4.093925000  | -0.475247000 |
| H  | 0.662625000  | 4.483832000  | 1.593757000  |
| H  | 0.641031000  | 4.405155000  | -1.914944000 |
| H  | 1.874812000  | 0.173211000  | 2.972434000  |
| H  | -1.941909000 | 2.898221000  | -0.108938000 |
| H  | -0.812917000 | -1.480298000 | 4.547705000  |
| H  | -0.487266000 | -2.070781000 | -4.332081000 |
| H  | 0.854304000  | -4.189529000 | 1.928435000  |
| H  | 0.431555000  | -4.603044000 | -1.489049000 |
| H  | -0.000740000 | -4.035801000 | 0.595695000  |
| O  | -1.115499000 | 0.126555000  | 1.549122000  |
| O  | -0.004899000 | -3.889566000 | 1.605915000  |
| O  | 1.036804000  | 1.510763000  | 0.002767000  |
| O  | 1.316583000  | 0.161377000  | 2.187793000  |
| O  | -0.072306000 | -1.085158000 | 4.075881000  |
| O  | -0.152321000 | 1.534068000  | 4.002773000  |
| O  | 0.145603000  | -1.710580000 | -3.703646000 |
| O  | 1.044131000  | -1.461679000 | 0.212079000  |
| O  | -1.423287000 | -2.048406000 | 0.225620000  |
| O  | -0.076637000 | -3.959646000 | -0.983646000 |
| O  | -0.070516000 | 4.000217000  | 1.198626000  |
| O  | -0.062683000 | 3.915754000  | -1.462670000 |
| O  | -1.421482000 | 2.088513000  | -0.063176000 |
| O  | 0.190179000  | 1.254404000  | -3.955232000 |
| O  | 1.380042000  | -0.115919000 | -2.046325000 |
| O  | -1.093984000 | -0.082893000 | -1.410152000 |
| Zr | 2.454685000  | 0.012290000  | 0.118317000  |
| Zr | -0.079541000 | -1.618435000 | 2.033908000  |
| Zr | -0.036367000 | 1.970675000  | 1.734120000  |
| Zr | -0.017413000 | 1.635774000  | -1.825120000 |
| Zr | -2.534353000 | 0.004602000  | 0.059447000  |
| Zr | 0.002113000  | -1.936358000 | -1.565727000 |
| N  | 2.696195000  | 4.388432000  | -4.058351000 |
| N  | -2.643854000 | 4.200835000  | -4.349602000 |
| N  | -2.602993000 | -4.563826000 | -3.977723000 |
| N  | 2.733858000  | -4.689993000 | -3.650577000 |
| O  | -2.145891000 | -3.949312000 | -4.936187000 |
| O  | -2.053056000 | -5.466488000 | -3.364666000 |
| O  | 2.245163000  | -5.534515000 | -2.915145000 |
| O  | 2.221875000  | -4.252141000 | -4.678269000 |
| O  | -2.197799000 | 3.502923000  | -5.253641000 |
| O  | -2.091541000 | 5.158748000  | -3.828825000 |
| O  | 2.108831000  | 5.166433000  | -3.307199000 |
| O  | 2.278988000  | 3.957693000  | -5.120600000 |
| Fe | 1.491190000  | -0.243337000 | -3.939049000 |
| O  | 2.289470000  | -1.395245000 | -5.272133000 |
| C  | 4.060755000  | 0.300796000  | -5.153416000 |
| C  | 5.378323000  | -0.006373000 | -4.485318000 |
| H  | 3.509977000  | -0.776100000 | -5.474277000 |
| H  | 4.130917000  | 0.812884000  | -6.130191000 |
| H  | 5.962996000  | 0.912080000  | -4.351323000 |



|   |             |              |              |
|---|-------------|--------------|--------------|
| H | 5.201247000 | -0.432342000 | -3.493244000 |
| H | 5.980331000 | -0.705943000 | -5.073686000 |
| O | 3.100273000 | 0.784276000  | -4.370852000 |
| H | 2.216994000 | -2.362037000 | -5.172375000 |

Fe-NU-1000-NO<sub>2</sub> (Prod\_4)

Free Energy: -5105.770318

Electronic Energy: -5106.0443404

|   |              |              |              |
|---|--------------|--------------|--------------|
| C | 5.726500000  | -2.889200000 | -2.160200000 |
| C | -5.638900000 | -2.885100000 | -2.451400000 |
| C | 4.388900000  | -3.187700000 | -2.460000000 |
| C | -4.293000000 | -3.161900000 | -2.734600000 |
| C | 4.106400000  | -4.252600000 | -3.328500000 |
| C | -3.986000000 | -4.236300000 | -3.582700000 |
| C | 5.138200000  | -5.020700000 | -3.859400000 |
| C | -4.998200000 | -5.035200000 | -4.107600000 |
| C | 6.482800000  | -4.751200000 | -3.537700000 |
| C | -6.351100000 | -4.782200000 | -3.807100000 |
| C | 6.755800000  | -3.657500000 | -2.694900000 |
| C | -6.649700000 | -3.679700000 | -2.983400000 |
| C | 5.673400000  | 2.762000000  | -2.369400000 |
| C | -5.668800000 | 2.628900000  | -2.684600000 |
| C | 4.341400000  | 3.021300000  | -2.724800000 |
| C | -4.324800000 | 2.872000000  | -3.008000000 |
| C | 4.069900000  | 4.017800000  | -3.673300000 |
| C | -4.019400000 | 3.907100000  | -3.904900000 |
| C | 5.105900000  | 4.760700000  | -4.231200000 |
| C | -5.033000000 | 4.692700000  | -4.448900000 |
| C | 6.444700000  | 4.526400000  | -3.861700000 |
| C | -6.384200000 | 4.462600000  | -4.123400000 |
| C | 6.708200000  | 3.500400000  | -2.934600000 |
| C | -6.680500000 | 3.408600000  | -3.237600000 |
| C | -3.223400000 | -2.332300000 | -2.105800000 |
| C | -3.315200000 | -2.089500000 | 2.441200000  |
| C | -3.322900000 | 2.330100000  | 2.211500000  |
| C | 3.188500000  | 2.437000000  | 2.193700000  |
| C | 3.242000000  | 2.242000000  | -2.086000000 |
| C | 3.280300000  | -2.402400000 | -1.851700000 |
| C | -3.245500000 | 2.084800000  | -2.346700000 |
| C | 3.174600000  | -2.211100000 | 2.426600000  |
| H | 5.937000000  | -2.056700000 | -1.495800000 |
| H | -5.871700000 | -2.048200000 | -1.800500000 |
| H | 4.900900000  | -5.847200000 | -4.524400000 |
| H | -4.737200000 | -5.873100000 | -4.749000000 |
| H | 7.786000000  | -3.416500000 | -2.445100000 |
| H | -7.686200000 | -3.452500000 | -2.747200000 |
| H | 5.874800000  | 1.981600000  | -1.642500000 |
| H | -5.899000000 | 1.830200000  | -1.986300000 |
| H | 4.876900000  | 5.534100000  | -4.959800000 |
| H | -4.774300000 | 5.498300000  | -5.131200000 |
| H | 7.734600000  | 3.290500000  | -2.644500000 |
| H | -7.714900000 | 3.205600000  | -2.972200000 |
| H | -7.139900000 | -5.409200000 | -4.210200000 |
| H | 7.286100000  | -5.356800000 | -3.944800000 |
| H | -7.172900000 | 5.077500000  | -4.544800000 |
| H | 7.252000000  | 5.109100000  | -4.293600000 |

|    |              |              |              |
|----|--------------|--------------|--------------|
| H  | -4.101094000 | -2.666618000 | 2.881887000  |
| H  | 3.964843000  | 3.004750000  | 2.662583000  |
| H  | -4.111859000 | 2.914440000  | 2.636930000  |
| H  | 3.948377000  | -2.768397000 | 2.911976000  |
| O  | -3.663700000 | 1.472100000  | 1.337400000  |
| O  | -3.610000000 | 1.255400000  | -1.456700000 |
| O  | -3.654000000 | -1.258600000 | 1.542900000  |
| O  | -2.127300000 | -2.310200000 | 2.835700000  |
| O  | 1.970300000  | -2.521800000 | 2.683600000  |
| O  | 2.090000000  | -2.742700000 | -2.140600000 |
| O  | 3.548200000  | -1.286100000 | 1.640800000  |
| O  | 3.614200000  | -1.448400000 | -1.083700000 |
| O  | 3.557200000  | 1.485700000  | 1.438500000  |
| O  | 3.591800000  | 1.320300000  | -1.285300000 |
| O  | 2.046400000  | 2.547800000  | -2.386400000 |
| O  | 1.986500000  | 2.771300000  | 2.435700000  |
| O  | -2.020200000 | -2.554500000 | -2.444700000 |
| O  | -3.604000000 | -1.474700000 | -1.248400000 |
| O  | -2.134300000 | 2.562400000  | 2.592300000  |
| O  | -2.045100000 | 2.316700000  | -2.694300000 |
| H  | -1.943363000 | -2.861902000 | 0.232060000  |
| H  | -1.040927000 | 1.816245000  | 4.277019000  |
| H  | -0.129919000 | 0.524489000  | 4.136908000  |
| H  | -0.425753000 | 1.731940000  | -4.596758000 |
| H  | 0.001898000  | 4.076836000  | -0.473978000 |
| H  | 0.663014000  | 4.479499000  | 1.597450000  |
| H  | 0.634082000  | 4.393408000  | -1.909271000 |
| H  | 1.889314000  | 0.172907000  | 2.964223000  |
| H  | -1.935784000 | 2.885065000  | -0.122395000 |
| H  | -0.820425000 | -1.479833000 | 4.556500000  |
| H  | -0.675639000 | -2.320149000 | -4.145329000 |
| H  | 0.856714000  | -4.185168000 | 1.933412000  |
| H  | 0.503493000  | -4.559640000 | -1.468808000 |
| H  | 0.006232000  | -4.031100000 | 0.596130000  |
| O  | -1.112158000 | 0.122430000  | 1.550042000  |
| O  | -0.005565000 | -3.893679000 | 1.611207000  |
| O  | 1.042543000  | 1.525781000  | 0.014477000  |
| O  | 1.313715000  | 0.160089000  | 2.192503000  |
| O  | -0.075615000 | -1.088982000 | 4.087892000  |
| O  | -0.157234000 | 1.532796000  | 4.009523000  |
| O  | 0.128308000  | -1.988163000 | -3.727686000 |
| O  | 1.049343000  | -1.482734000 | 0.235181000  |
| O  | -1.423621000 | -2.051089000 | 0.232053000  |
| O  | -0.062841000 | -3.959131000 | -0.972500000 |
| O  | -0.076992000 | 4.001691000  | 1.208188000  |
| O  | -0.064467000 | 3.898576000  | -1.459908000 |
| O  | -1.419529000 | 2.074034000  | -0.060075000 |
| O  | 0.196714000  | 1.353307000  | -3.967817000 |
| O  | 1.314925000  | -0.122419000 | -2.038704000 |
| O  | -1.139893000 | -0.102251000 | -1.430829000 |
| Zr | 2.427027000  | 0.004406000  | 0.106732000  |
| Zr | -0.080118000 | -1.623271000 | 2.044719000  |
| Zr | -0.036296000 | 1.970907000  | 1.738596000  |
| Zr | -0.009445000 | 1.593177000  | -1.822355000 |
| Zr | -2.535788000 | 0.003459000  | 0.062786000  |
| Zr | 0.011147000  | -1.922061000 | -1.552636000 |

|    |              |              |              |
|----|--------------|--------------|--------------|
| N  | 2.697104000  | 4.335870000  | -4.104187000 |
| N  | -2.645257000 | 4.197637000  | -4.354296000 |
| N  | -2.614324000 | -4.523151000 | -4.043090000 |
| N  | 2.751090000  | -4.568184000 | -3.817353000 |
| O  | -2.175031000 | -3.798085000 | -4.935401000 |
| O  | -2.059568000 | -5.500061000 | -3.567904000 |
| O  | 2.116360000  | -5.425585000 | -3.220303000 |
| O  | 2.423626000  | -4.006393000 | -4.856477000 |
| O  | -2.205303000 | 3.498161000  | -5.261222000 |
| O  | -2.089475000 | 5.156502000  | -3.840203000 |
| O  | 2.103486000  | 5.196913000  | -3.459877000 |
| O  | 2.288864000  | 3.765657000  | -5.103619000 |
| Fe | 1.178497000  | -0.358503000 | -4.093527000 |
| O  | 0.794623000  | -0.943122000 | -6.288686000 |
| C  | 4.222518000  | -1.041115000 | -4.685082000 |
| C  | 5.114366000  | -0.010736000 | -4.106798000 |
| H  | 4.656314000  | -1.960387000 | -5.116488000 |
| H  | 1.314508000  | -1.758436000 | -6.258096000 |
| H  | 4.957404000  | 0.953024000  | -4.606124000 |
| H  | 4.838569000  | 0.136669000  | -3.052281000 |
| H  | 6.168224000  | -0.285994000 | -4.176510000 |
| O  | 2.991189000  | -0.929368000 | -4.685470000 |
| H  | -0.114602000 | -1.246486000 | -6.389959000 |

Fe-NU-1000-OH-O

Free Energy: -4433.692456

Electronic Energy: -4433.9130324

|   |              |              |              |
|---|--------------|--------------|--------------|
| C | 5.726500000  | -2.889193000 | -2.160209000 |
| C | -5.638900000 | -2.885101000 | -2.451398000 |
| C | 4.388919000  | -3.187698000 | -2.460008000 |
| C | -4.293001000 | -3.161903000 | -2.734597000 |
| C | 4.106369000  | -4.252609000 | -3.328505000 |
| C | -3.985998000 | -4.236301000 | -3.582700000 |
| C | 5.138212000  | -5.020694000 | -3.859384000 |
| C | -4.998201000 | -5.035199000 | -4.107600000 |
| C | 6.482799000  | -4.751209000 | -3.537689000 |
| C | -6.351100000 | -4.782199000 | -3.807101000 |
| C | 6.755800000  | -3.657500000 | -2.694900000 |
| C | -6.649700000 | -3.679700000 | -2.983400000 |
| C | 5.673401000  | 2.761992000  | -2.369408000 |
| C | -5.668799000 | 2.628906000  | -2.684592000 |
| C | 4.341409000  | 3.021297000  | -2.724805000 |
| C | -4.324797000 | 2.872005000  | -3.007994000 |
| C | 4.069886000  | 4.017805000  | -3.673301000 |
| C | -4.019404000 | 3.907097000  | -3.904901000 |
| C | 5.105905000  | 4.760701000  | -4.231190000 |
| C | -5.032999000 | 4.692698000  | -4.448906000 |
| C | 6.444699000  | 4.526409000  | -3.861691000 |
| C | -6.384201000 | 4.462593000  | -4.123408000 |
| C | 6.708200000  | 3.500400000  | -2.934600000 |
| C | -6.680500000 | 3.408600000  | -3.237600000 |
| C | -3.223402000 | -2.332311000 | -2.105800000 |
| C | -3.315200000 | -2.089500000 | 2.441200000  |
| C | -3.322899000 | 2.330100000  | 2.211499000  |
| C | 3.188500000  | 2.437000000  | 2.193701000  |
| C | 3.241999000  | 2.242005000  | -2.085998000 |

|   |              |              |              |
|---|--------------|--------------|--------------|
| C | 3.280300000  | -2.402400000 | -1.851700000 |
| C | -3.245500000 | 2.084803000  | -2.346704000 |
| C | 3.174599000  | -2.211099000 | 2.426599000  |
| H | 5.937000000  | -2.056700000 | -1.495800000 |
| H | -5.871700000 | -2.048200000 | -1.800500000 |
| H | 4.900901000  | -5.847192000 | -4.524411000 |
| H | -4.737200000 | -5.873101000 | -4.748999000 |
| H | 7.786000000  | -3.416500000 | -2.445100000 |
| H | -7.686200000 | -3.452500000 | -2.747200000 |
| H | 5.874800000  | 1.981600000  | -1.642500000 |
| H | -5.899000000 | 1.830200000  | -1.986300000 |
| H | 4.876901000  | 5.534092000  | -4.959809000 |
| H | -4.774299000 | 5.498307000  | -5.131192000 |
| H | 7.734600000  | 3.290500000  | -2.644500000 |
| H | -7.714900000 | 3.205600000  | -2.972200000 |
| H | -7.139900000 | -5.409200000 | -4.210200000 |
| H | 7.286100000  | -5.356800000 | -3.944800000 |
| H | -7.172900000 | 5.077500000  | -4.544800000 |
| H | 7.252000000  | 5.109100000  | -4.293600000 |
| H | -4.101095000 | -2.666617000 | 2.881887000  |
| H | 3.964843000  | 3.004750000  | 2.662584000  |
| H | -4.111859000 | 2.914439000  | 2.636931000  |
| H | 3.948377000  | -2.768397000 | 2.911977000  |
| O | -3.663703000 | 1.472100000  | 1.337398000  |
| O | -3.610000000 | 1.255401000  | -1.456700000 |
| O | -3.654002000 | -1.258599000 | 1.542898000  |
| O | -2.127299000 | -2.310203000 | 2.835698000  |
| O | 1.970301000  | -2.521802000 | 2.683597000  |
| O | 2.089996000  | -2.742681000 | -2.140604000 |
| O | 3.548199000  | -1.286096000 | 1.640799000  |
| O | 3.614196000  | -1.448402000 | -1.083694000 |
| O | 3.557201000  | 1.485693000  | 1.438500000  |
| O | 3.591789000  | 1.320308000  | -1.285296000 |
| O | 2.046405000  | 2.547778000  | -2.386393000 |
| O | 1.986502000  | 2.771303000  | 2.435695000  |
| O | -2.020199000 | -2.554484000 | -2.444700000 |
| O | -3.604000000 | -1.474704000 | -1.248396000 |
| O | -2.134298000 | 2.562406000  | 2.592297000  |
| O | -2.045087000 | 2.316682000  | -2.694298000 |
| H | -1.958623000 | -2.855944000 | 0.218863000  |
| H | -1.014660000 | 1.831501000  | 4.315234000  |
| H | -0.136495000 | 0.514830000  | 4.146626000  |
| H | -0.299661000 | 1.608475000  | -4.745844000 |
| H | -0.039085000 | 4.067890000  | -0.395539000 |
| H | 0.636568000  | 4.482166000  | 1.605655000  |
| H | 0.825593000  | 4.307692000  | -1.698093000 |
| H | 1.865886000  | 0.164688000  | 2.984786000  |
| H | -1.963667000 | 2.883342000  | -0.094133000 |
| H | -0.807958000 | -1.491575000 | 4.558397000  |
| H | -0.021793000 | -2.302618000 | -4.571884000 |
| H | 0.839742000  | -4.209847000 | 1.915654000  |
| H | 0.677540000  | -4.503539000 | -1.373148000 |
| H | -0.020207000 | -4.027117000 | 0.592395000  |
| O | -1.115634000 | 0.117886000  | 1.529777000  |
| O | -0.011707000 | -3.886039000 | 1.595183000  |
| O | 1.036359000  | 1.490181000  | 0.006455000  |

|    |              |              |              |
|----|--------------|--------------|--------------|
| O  | 1.316659000  | 0.154678000  | 2.193218000  |
| O  | -0.080387000 | -1.086400000 | 4.074646000  |
| O  | -0.152129000 | 1.523190000  | 4.009303000  |
| O  | 0.198711000  | -1.781541000 | -3.794321000 |
| O  | 1.044175000  | -1.450668000 | 0.197277000  |
| O  | -1.417306000 | -2.058621000 | 0.217715000  |
| O  | -0.052682000 | -3.971893000 | -1.041195000 |
| O  | -0.084957000 | 3.984465000  | 1.206235000  |
| O  | -0.011426000 | 3.928584000  | -1.403656000 |
| O  | -1.425655000 | 2.084614000  | -0.056152000 |
| O  | 0.221747000  | 1.377434000  | -3.971789000 |
| O  | 1.327868000  | -0.112015000 | -2.114767000 |
| O  | -1.108411000 | -0.089404000 | -1.432775000 |
| Zr | 2.495521000  | 0.005734000  | 0.127197000  |
| Zr | -0.084949000 | -1.616923000 | 2.038997000  |
| Zr | -0.043177000 | 1.952512000  | 1.752426000  |
| Zr | -0.031256000 | 1.630947000  | -1.779150000 |
| Zr | -2.570137000 | -0.002133000 | 0.049761000  |
| Zr | 0.009883000  | -1.922702000 | -1.547599000 |
| Fe | 1.251748000  | -0.240918000 | -3.980738000 |
| O  | 1.830187000  | -0.362674000 | -5.491722000 |
| O  | 2.861301000  | -4.604076000 | -3.711818000 |
| H  | 2.255318000  | -3.964073000 | -3.288072000 |
| O  | -2.723986000 | -4.577598000 | -3.913832000 |
| H  | -2.134847000 | -3.961527000 | -3.432791000 |
| O  | 2.825940000  | 4.314801000  | -4.109090000 |
| H  | 2.224357000  | 3.669503000  | -3.689749000 |
| O  | -2.763418000 | 4.230213000  | -4.274202000 |
| H  | -2.166164000 | 3.641199000  | -3.772452000 |

Fe-NU-1000-OH (Ads\_4)

Free Energy: -4588.676627

Electronic Energy: -4588.9776038

|   |              |              |              |
|---|--------------|--------------|--------------|
| C | 5.726500000  | -2.889200000 | -2.160200000 |
| C | -5.638900000 | -2.885100000 | -2.451399000 |
| C | 4.388903000  | -3.187699000 | -2.460002000 |
| C | -4.293000000 | -3.161903000 | -2.734597000 |
| C | 4.106394000  | -4.252601000 | -3.328502000 |
| C | -3.986000000 | -4.236300000 | -3.582700000 |
| C | 5.138202000  | -5.020698000 | -3.859398000 |
| C | -4.998200000 | -5.035200000 | -4.107600000 |
| C | 6.482800000  | -4.751200000 | -3.537700000 |
| C | -6.351100000 | -4.782200000 | -3.807100000 |
| C | 6.755800000  | -3.657500000 | -2.694900000 |
| C | -6.649700000 | -3.679700000 | -2.983400000 |
| C | 5.673400000  | 2.762000000  | -2.369400000 |
| C | -5.668800000 | 2.628900000  | -2.684600000 |
| C | 4.341400000  | 3.021300000  | -2.724800000 |
| C | -4.324800000 | 2.872001000  | -3.007999000 |
| C | 4.069900000  | 4.017800000  | -3.673300000 |
| C | -4.019400000 | 3.907100000  | -3.904900000 |
| C | 5.105900000  | 4.760700000  | -4.231200000 |
| C | -5.033000000 | 4.692700000  | -4.448900000 |
| C | 6.444700000  | 4.526400000  | -3.861700000 |
| C | -6.384200000 | 4.462600000  | -4.123400000 |
| C | 6.708200000  | 3.500400000  | -2.934600000 |

|   |              |              |              |
|---|--------------|--------------|--------------|
| C | -6.680500000 | 3.408600000  | -3.237600000 |
| C | -3.223401000 | -2.332309000 | -2.105797000 |
| C | -3.315200000 | -2.089500000 | 2.441200000  |
| C | -3.322901000 | 2.330102000  | 2.211500000  |
| C | 3.188500000  | 2.436998000  | 2.193701000  |
| C | 3.241998000  | 2.241995000  | -2.086000000 |
| C | 3.280300000  | -2.402392000 | -1.851709000 |
| C | -3.245502000 | 2.084807000  | -2.346700000 |
| C | 3.174601000  | -2.211100000 | 2.426601000  |
| H | 5.937000000  | -2.056700000 | -1.495800000 |
| H | -5.871700000 | -2.048200000 | -1.800500000 |
| H | 4.900900000  | -5.847200000 | -4.524400000 |
| H | -4.737200000 | -5.873100000 | -4.749000000 |
| H | 7.786000000  | -3.416500000 | -2.445100000 |
| H | -7.686200000 | -3.452500000 | -2.747200000 |
| H | 5.874800000  | 1.981600000  | -1.642500000 |
| H | -5.899000000 | 1.830200000  | -1.986300000 |
| H | 4.876900000  | 5.534100000  | -4.959800000 |
| H | -4.774300000 | 5.498300000  | -5.131200000 |
| H | 7.734600000  | 3.290500000  | -2.644500000 |
| H | -7.714900000 | 3.205600000  | -2.972200000 |
| H | -7.139900000 | -5.409200000 | -4.210200000 |
| H | 7.286100000  | -5.356800000 | -3.944800000 |
| H | -7.172900000 | 5.077500000  | -4.544800000 |
| H | 7.252000000  | 5.109100000  | -4.293600000 |
| H | -4.101094000 | -2.666618000 | 2.881887000  |
| H | 3.964843000  | 3.004750000  | 2.662583000  |
| H | -4.111859000 | 2.914440000  | 2.636930000  |
| H | 3.948377000  | -2.768397000 | 2.911976000  |
| O | -3.663704000 | 1.472101000  | 1.337399000  |
| O | -3.610005000 | 1.255403000  | -1.456699000 |
| O | -3.654000000 | -1.258598000 | 1.542899000  |
| O | -2.127298000 | -2.310199000 | 2.835697000  |
| O | 1.970300000  | -2.521796000 | 2.683595000  |
| O | 2.090003000  | -2.742682000 | -2.140594000 |
| O | 3.548201000  | -1.286093000 | 1.640799000  |
| O | 3.614190000  | -1.448399000 | -1.083704000 |
| O | 3.557200000  | 1.485692000  | 1.438499000  |
| O | 3.591789000  | 1.320303000  | -1.285298000 |
| O | 2.046407000  | 2.547769000  | -2.386385000 |
| O | 1.986501000  | 2.771293000  | 2.435697000  |
| O | -2.020184000 | -2.554502000 | -2.444698000 |
| O | -3.604002000 | -1.474701000 | -1.248397000 |
| O | -2.134300000 | 2.562402000  | 2.592300000  |
| O | -2.045094000 | 2.316705000  | -2.694308000 |
| H | -1.953580000 | -2.857614000 | 0.222056000  |
| H | -1.022798000 | 1.825970000  | 4.301826000  |
| H | -0.137245000 | 0.514016000  | 4.141983000  |
| H | -0.357167000 | 1.578499000  | -4.720160000 |
| H | -0.043776000 | 4.052121000  | -0.409288000 |
| H | 0.638543000  | 4.477008000  | 1.600484000  |
| H | 0.830231000  | 4.285524000  | -1.699564000 |
| H | 1.866696000  | 0.165280000  | 2.984628000  |
| H | -1.959621000 | 2.875851000  | -0.098092000 |
| H | -0.812390000 | -1.490900000 | 4.553153000  |
| H | -0.443186000 | -2.139009000 | -4.443438000 |

|    |              |              |              |
|----|--------------|--------------|--------------|
| H  | 0.842367000  | -4.204030000 | 1.912198000  |
| H  | 0.658722000  | -4.504816000 | -1.379592000 |
| H  | -0.013381000 | -4.018639000 | 0.582414000  |
| O  | -1.116548000 | 0.116743000  | 1.533154000  |
| O  | -0.009764000 | -3.883686000 | 1.590661000  |
| O  | 1.040517000  | 1.486379000  | 0.003047000  |
| O  | 1.317208000  | 0.154476000  | 2.193487000  |
| O  | -0.079938000 | -1.089027000 | 4.074137000  |
| O  | -0.154668000 | 1.522588000  | 4.006713000  |
| O  | 0.206682000  | -1.908407000 | -3.771556000 |
| O  | 1.047410000  | -1.447861000 | 0.198120000  |
| O  | -1.419700000 | -2.055534000 | 0.220864000  |
| O  | -0.054256000 | -3.964402000 | -1.026698000 |
| O  | -0.086823000 | 3.982164000  | 1.204773000  |
| O  | -0.012442000 | 3.913136000  | -1.414707000 |
| O  | -1.424731000 | 2.075546000  | -0.054996000 |
| O  | 0.222665000  | 1.410464000  | -3.970561000 |
| O  | 1.270651000  | -0.118302000 | -2.161978000 |
| O  | -1.142050000 | -0.097608000 | -1.436541000 |
| Zr | 2.485660000  | 0.001071000  | 0.123932000  |
| Zr | -0.084793000 | -1.617882000 | 2.035666000  |
| Zr | -0.042492000 | 1.949856000  | 1.746226000  |
| Zr | -0.031871000 | 1.597216000  | -1.790711000 |
| Zr | -2.573853000 | -0.002027000 | 0.053916000  |
| Zr | 0.004071000  | -1.908184000 | -1.556980000 |
| O  | 2.861140000  | -4.580071000 | -3.734707000 |
| H  | 2.247905000  | -3.963370000 | -3.279907000 |
| O  | -2.724054000 | -4.581751000 | -3.911661000 |
| H  | -2.130701000 | -3.981729000 | -3.416120000 |
| O  | 2.827262000  | 4.298155000  | -4.120161000 |
| H  | 2.222287000  | 3.669042000  | -3.675828000 |
| O  | -2.763036000 | 4.230146000  | -4.272586000 |
| H  | -2.165924000 | 3.641126000  | -3.769229000 |
| Fe | 1.158836000  | -0.271397000 | -4.111865000 |
| O  | 1.037838000  | -0.336734000 | -5.742893000 |
| C  | 4.003503000  | 0.233720000  | -4.878093000 |
| C  | 5.443469000  | 0.089864000  | -4.474699000 |
| H  | 3.833289000  | 0.154346000  | -5.956446000 |
| H  | 3.587869000  | 1.194270000  | -4.555600000 |
| H  | 5.526515000  | 0.126794000  | -3.385027000 |
| H  | 5.867156000  | -0.857320000 | -4.823407000 |
| H  | 6.034167000  | 0.909874000  | -4.893546000 |
| O  | 3.199565000  | -0.773860000 | -4.196877000 |
| H  | 3.254494000  | -1.594444000 | -4.708338000 |

Fe-NU-1000-OH (TS1\_4)

Free Energy: -4588.658877

Electronic Energy: -4588.9546189

|   |              |              |              |
|---|--------------|--------------|--------------|
| C | 5.726500000  | -2.889200000 | -2.160200000 |
| C | -5.638900000 | -2.885100000 | -2.451400000 |
| C | 4.388900000  | -3.187700000 | -2.460000000 |
| C | -4.293000000 | -3.161900000 | -2.734600000 |
| C | 4.106400000  | -4.252600000 | -3.328500000 |
| C | -3.986000000 | -4.236300000 | -3.582700000 |
| C | 5.138200000  | -5.020700000 | -3.859400000 |
| C | -4.998200000 | -5.035200000 | -4.107600000 |

|   |              |              |              |
|---|--------------|--------------|--------------|
| C | 6.482800000  | -4.751200000 | -3.537700000 |
| C | -6.351100000 | -4.782200000 | -3.807100000 |
| C | 6.755800000  | -3.657500000 | -2.694900000 |
| C | -6.649700000 | -3.679700000 | -2.983400000 |
| C | 5.673400000  | 2.762000000  | -2.369400000 |
| C | -5.668800000 | 2.628900000  | -2.684600000 |
| C | 4.341400000  | 3.021300000  | -2.724800000 |
| C | -4.324800000 | 2.872000000  | -3.008000000 |
| C | 4.069900000  | 4.017800000  | -3.673300000 |
| C | -4.019400000 | 3.907100000  | -3.904900000 |
| C | 5.105900000  | 4.760700000  | -4.231200000 |
| C | -5.033000000 | 4.692700000  | -4.448900000 |
| C | 6.444700000  | 4.526400000  | -3.861700000 |
| C | -6.384200000 | 4.462600000  | -4.123400000 |
| C | 6.708200000  | 3.500400000  | -2.934600000 |
| C | -6.680500000 | 3.408600000  | -3.237600000 |
| C | -3.223400000 | -2.332300000 | -2.105800000 |
| C | -3.315200000 | -2.089500000 | 2.441200000  |
| C | -3.322900000 | 2.330100000  | 2.211500000  |
| C | 3.188500000  | 2.437000000  | 2.193700000  |
| C | 3.242000000  | 2.242000000  | -2.086000000 |
| C | 3.280300000  | -2.402400000 | -1.851700000 |
| C | -3.245500000 | 2.084800000  | -2.346700000 |
| C | 3.174600000  | -2.211100000 | 2.426600000  |
| H | 5.937000000  | -2.056700000 | -1.495800000 |
| H | -5.871700000 | -2.048200000 | -1.800500000 |
| H | 4.900900000  | -5.847200000 | -4.524400000 |
| H | -4.737200000 | -5.873100000 | -4.749000000 |
| H | 7.786000000  | -3.416500000 | -2.445100000 |
| H | -7.686200000 | -3.452500000 | -2.747200000 |
| H | 5.874800000  | 1.981600000  | -1.642500000 |
| H | -5.899000000 | 1.830200000  | -1.986300000 |
| H | 4.876900000  | 5.534100000  | -4.959800000 |
| H | -4.774300000 | 5.498300000  | -5.131200000 |
| H | 7.734600000  | 3.290500000  | -2.644500000 |
| H | -7.714900000 | 3.205600000  | -2.972200000 |
| H | -7.139900000 | -5.409200000 | -4.210200000 |
| H | 7.286100000  | -5.356800000 | -3.944800000 |
| H | -7.172900000 | 5.077500000  | -4.544800000 |
| H | 7.252000000  | 5.109100000  | -4.293600000 |
| H | -4.101094000 | -2.666618000 | 2.881887000  |
| H | 3.964843000  | 3.004750000  | 2.662583000  |
| H | -4.111859000 | 2.914440000  | 2.636930000  |
| H | 3.948377000  | -2.768397000 | 2.911976000  |
| O | -3.663700000 | 1.472100000  | 1.337400000  |
| O | -3.610000000 | 1.255400000  | -1.456700000 |
| O | -3.654000000 | -1.258600000 | 1.542900000  |
| O | -2.127300000 | -2.310200000 | 2.835700000  |
| O | 1.970300000  | -2.521800000 | 2.683600000  |
| O | 2.090000000  | -2.742700000 | -2.140600000 |
| O | 3.548200000  | -1.286100000 | 1.640800000  |
| O | 3.614200000  | -1.448400000 | -1.083700000 |
| O | 3.557200000  | 1.485700000  | 1.438500000  |
| O | 3.591800000  | 1.320300000  | -1.285300000 |
| O | 2.046400000  | 2.547800000  | -2.386400000 |
| O | 1.986500000  | 2.771300000  | 2.435700000  |



|    |              |              |              |
|----|--------------|--------------|--------------|
| O  | -2.020200000 | -2.554500000 | -2.444700000 |
| O  | -3.604000000 | -1.474700000 | -1.248400000 |
| O  | -2.134300000 | 2.562400000  | 2.592300000  |
| O  | -2.045100000 | 2.316700000  | -2.694300000 |
| H  | -1.952733000 | -2.852171000 | 0.217627000  |
| H  | -1.017442000 | 1.830658000  | 4.301606000  |
| H  | -0.139195000 | 0.513721000  | 4.137711000  |
| H  | -0.517876000 | 1.579518000  | -4.631150000 |
| H  | -0.030132000 | 4.075403000  | -0.398258000 |
| H  | 0.640966000  | 4.480110000  | 1.609951000  |
| H  | 0.821454000  | 4.315008000  | -1.712100000 |
| H  | 1.860199000  | 0.163439000  | 2.991209000  |
| H  | -1.959546000 | 2.886945000  | -0.089226000 |
| H  | -0.810958000 | -1.494369000 | 4.543497000  |
| H  | -0.407236000 | -2.062842000 | -4.487835000 |
| H  | 0.840016000  | -4.208935000 | 1.908774000  |
| H  | 0.651482000  | -4.508639000 | -1.393655000 |
| H  | -0.012886000 | -4.020726000 | 0.577453000  |
| O  | -1.115146000 | 0.119637000  | 1.529265000  |
| O  | -0.006905000 | -3.879221000 | 1.583130000  |
| O  | 1.045374000  | 1.475646000  | -0.001103000 |
| O  | 1.320322000  | 0.154285000  | 2.193249000  |
| O  | -0.080458000 | -1.088977000 | 4.064295000  |
| O  | -0.152553000 | 1.522200000  | 4.002022000  |
| O  | 0.203845000  | -1.834767000 | -3.779222000 |
| O  | 1.049741000  | -1.427966000 | 0.176091000  |
| O  | -1.414336000 | -2.052917000 | 0.212995000  |
| O  | -0.057143000 | -3.964740000 | -1.036216000 |
| O  | -0.078100000 | 3.983122000  | 1.205389000  |
| O  | -0.011046000 | 3.935378000  | -1.405261000 |
| O  | -1.422467000 | 2.087368000  | -0.056742000 |
| O  | 0.152784000  | 1.472810000  | -3.949004000 |
| O  | 1.313924000  | -0.107401000 | -2.227549000 |
| O  | -1.102921000 | -0.085398000 | -1.434067000 |
| Zr | 2.507719000  | 0.010951000  | 0.135130000  |
| Zr | -0.082169000 | -1.614548000 | 2.027182000  |
| Zr | -0.039736000 | 1.950103000  | 1.744305000  |
| Zr | -0.029414000 | 1.642375000  | -1.789176000 |
| Zr | -2.566186000 | -0.000527000 | 0.047441000  |
| Zr | 0.009223000  | -1.917291000 | -1.567447000 |
| O  | 2.864354000  | -4.589929000 | -3.730157000 |
| H  | 2.250773000  | -3.950220000 | -3.315133000 |
| O  | -2.724914000 | -4.582274000 | -3.913300000 |
| H  | -2.130003000 | -3.979294000 | -3.424424000 |
| O  | 2.828112000  | 4.303406000  | -4.119119000 |
| H  | 2.229775000  | 3.639543000  | -3.723590000 |
| O  | -2.764103000 | 4.232217000  | -4.274262000 |
| H  | -2.163077000 | 3.647776000  | -3.771971000 |
| Fe | 1.158321000  | -0.200064000 | -4.085304000 |
| O  | 1.010231000  | -0.280000000 | -5.796547000 |
| C  | 4.023917000  | -0.654010000 | -4.835597000 |
| C  | 5.201135000  | -0.184286000 | -4.025287000 |
| H  | 3.646090000  | -1.619388000 | -4.461595000 |
| H  | 4.307511000  | -0.822520000 | -5.883466000 |
| H  | 5.572490000  | 0.769698000  | -4.409972000 |
| H  | 4.920881000  | -0.046839000 | -2.975991000 |

|   |             |              |              |
|---|-------------|--------------|--------------|
| H | 6.009805000 | -0.919657000 | -4.074561000 |
| O | 2.978778000 | 0.324920000  | -4.815690000 |
| H | 2.157774000 | 0.104654000  | -5.711716000 |

Fe-NU-1000-OH (Int\_4)

Free Energy: -4588.694658

Electronic Energy: -4588.9947954

|   |              |              |              |
|---|--------------|--------------|--------------|
| C | 5.726500000  | -2.889200000 | -2.160200000 |
| C | -5.638900000 | -2.885100000 | -2.451400000 |
| C | 4.388900000  | -3.187700000 | -2.460000000 |
| C | -4.293000000 | -3.161900000 | -2.734600000 |
| C | 4.106400000  | -4.252600000 | -3.328500000 |
| C | -3.986000000 | -4.236300000 | -3.582700000 |
| C | 5.138200000  | -5.020700000 | -3.859400000 |
| C | -4.998200000 | -5.035200000 | -4.107600000 |
| C | 6.482800000  | -4.751200000 | -3.537700000 |
| C | -6.351100000 | -4.782200000 | -3.807100000 |
| C | 6.755800000  | -3.657500000 | -2.694900000 |
| C | -6.649700000 | -3.679700000 | -2.983400000 |
| C | 5.673400000  | 2.762000000  | -2.369400000 |
| C | -5.668800000 | 2.628900000  | -2.684600000 |
| C | 4.341400000  | 3.021300000  | -2.724800000 |
| C | -4.324800000 | 2.872000000  | -3.008000000 |
| C | 4.069900000  | 4.017800000  | -3.673300000 |
| C | -4.019400000 | 3.907100000  | -3.904900000 |
| C | 5.105900000  | 4.760700000  | -4.231200000 |
| C | -5.033000000 | 4.692700000  | -4.448900000 |
| C | 6.444700000  | 4.526400000  | -3.861700000 |
| C | -6.384200000 | 4.462600000  | -4.123400000 |
| C | 6.708200000  | 3.500400000  | -2.934600000 |
| C | -6.680500000 | 3.408600000  | -3.237600000 |
| C | -3.223400000 | -2.332300000 | -2.105800000 |
| C | -3.315200000 | -2.089500000 | 2.441200000  |
| C | -3.322900000 | 2.330100000  | 2.211500000  |
| C | 3.188500000  | 2.437000000  | 2.193700000  |
| C | 3.242000000  | 2.242000000  | -2.086000000 |
| C | 3.280300000  | -2.402400000 | -1.851700000 |
| C | -3.245500000 | 2.084800000  | -2.346700000 |
| C | 3.174600000  | -2.211100000 | 2.426600000  |
| H | 5.937000000  | -2.056700000 | -1.495800000 |
| H | -5.871700000 | -2.048200000 | -1.800500000 |
| H | 4.900900000  | -5.847200000 | -4.524400000 |
| H | -4.737200000 | -5.873100000 | -4.749000000 |
| H | 7.786000000  | -3.416500000 | -2.445100000 |
| H | -7.686200000 | -3.452500000 | -2.747200000 |
| H | 5.874800000  | 1.981600000  | -1.642500000 |
| H | -5.899000000 | 1.830200000  | -1.986300000 |
| H | 4.876900000  | 5.534100000  | -4.959800000 |
| H | -4.774300000 | 5.498300000  | -5.131200000 |
| H | 7.734600000  | 3.290500000  | -2.644500000 |
| H | -7.714900000 | 3.205600000  | -2.972200000 |
| H | -7.139900000 | -5.409200000 | -4.210200000 |
| H | 7.286100000  | -5.356800000 | -3.944800000 |
| H | -7.172900000 | 5.077500000  | -4.544800000 |
| H | 7.252000000  | 5.109100000  | -4.293600000 |
| H | -4.101094000 | -2.666618000 | 2.881887000  |

|    |              |              |              |
|----|--------------|--------------|--------------|
| H  | 3.964843000  | 3.004750000  | 2.662583000  |
| H  | -4.111859000 | 2.914440000  | 2.636930000  |
| H  | 3.948377000  | -2.768397000 | 2.911976000  |
| O  | -3.663700000 | 1.472100000  | 1.337400000  |
| O  | -3.610000000 | 1.255400000  | -1.456700000 |
| O  | -3.654000000 | -1.258600000 | 1.542900000  |
| O  | -2.127300000 | -2.310200000 | 2.835700000  |
| O  | 1.970300000  | -2.521800000 | 2.683600000  |
| O  | 2.090000000  | -2.742700000 | -2.140600000 |
| O  | 3.548200000  | -1.286100000 | 1.640800000  |
| O  | 3.614200000  | -1.448400000 | -1.083700000 |
| O  | 3.557200000  | 1.485700000  | 1.438500000  |
| O  | 3.591800000  | 1.320300000  | -1.285300000 |
| O  | 2.046400000  | 2.547800000  | -2.386400000 |
| O  | 1.986500000  | 2.771300000  | 2.435700000  |
| O  | -2.020200000 | -2.554500000 | -2.444700000 |
| O  | -3.604000000 | -1.474700000 | -1.248400000 |
| O  | -2.134300000 | 2.562400000  | 2.592300000  |
| O  | -2.045100000 | 2.316700000  | -2.694300000 |
| H  | -1.959406000 | -2.862724000 | 0.241253000  |
| H  | -1.020002000 | 1.840282000  | 4.303236000  |
| H  | -0.137080000 | 0.527046000  | 4.149104000  |
| H  | -0.398124000 | 1.359836000  | -4.645380000 |
| H  | -0.040826000 | 4.055454000  | -0.415235000 |
| H  | 0.636851000  | 4.482011000  | 1.591835000  |
| H  | 0.834638000  | 4.274502000  | -1.711797000 |
| H  | 1.865203000  | 0.175514000  | 2.993443000  |
| H  | -1.963022000 | 2.875170000  | -0.097233000 |
| H  | -0.810672000 | -1.484711000 | 4.567728000  |
| H  | -0.715317000 | -1.589641000 | -4.075827000 |
| H  | 0.840093000  | -4.199127000 | 1.957819000  |
| H  | 0.611283000  | -4.562197000 | -1.367147000 |
| H  | -0.018173000 | -4.041765000 | 0.630342000  |
| O  | -1.116119000 | 0.117515000  | 1.536521000  |
| O  | -0.014815000 | -3.888637000 | 1.632890000  |
| O  | 1.036493000  | 1.480373000  | 0.001775000  |
| O  | 1.317932000  | 0.159009000  | 2.200799000  |
| O  | -0.080428000 | -1.081955000 | 4.085995000  |
| O  | -0.153215000 | 1.533443000  | 4.007637000  |
| O  | 0.155571000  | -1.789706000 | -3.708975000 |
| O  | 1.055069000  | -1.455383000 | 0.220762000  |
| O  | -1.421770000 | -2.063137000 | 0.233730000  |
| O  | -0.061949000 | -3.988990000 | -0.989053000 |
| O  | -0.084500000 | 3.981834000  | 1.195417000  |
| O  | -0.012329000 | 3.913800000  | -1.421283000 |
| O  | -1.424599000 | 2.076772000  | -0.061199000 |
| O  | 0.239086000  | 1.272604000  | -3.931304000 |
| O  | 1.352377000  | -0.133847000 | -2.066673000 |
| O  | -1.108352000 | -0.101957000 | -1.428945000 |
| Zr | 2.501674000  | 0.011672000  | 0.126277000  |
| Zr | -0.082135000 | -1.614190000 | 2.051595000  |
| Zr | -0.040285000 | 1.951553000  | 1.744150000  |
| Zr | -0.027833000 | 1.615453000  | -1.800737000 |
| Zr | -2.563859000 | -0.000450000 | 0.053567000  |
| Zr | 0.013242000  | -1.941335000 | -1.507698000 |
| O  | 2.863777000  | -4.593175000 | -3.728400000 |

|    |              |              |              |
|----|--------------|--------------|--------------|
| H  | 2.248555000  | -3.963869000 | -3.300739000 |
| O  | -2.726231000 | -4.580654000 | -3.918617000 |
| H  | -2.126527000 | -3.973549000 | -3.440550000 |
| O  | 2.827178000  | 4.300158000  | -4.120372000 |
| H  | 2.231219000  | 3.639739000  | -3.714328000 |
| O  | -2.764656000 | 4.230875000  | -4.275883000 |
| H  | -2.163232000 | 3.642821000  | -3.778012000 |
| Fe | 1.490007000  | -0.320624000 | -3.905615000 |
| O  | 1.490183000  | -0.732109000 | -5.665133000 |
| C  | 4.122409000  | -0.403193000 | -4.894934000 |
| C  | 5.480032000  | 0.220090000  | -4.657846000 |
| H  | 4.164289000  | -1.491028000 | -4.720393000 |
| H  | 3.777424000  | -0.258081000 | -5.927879000 |
| H  | 5.475152000  | 1.284474000  | -4.906092000 |
| H  | 5.769101000  | 0.117767000  | -3.607951000 |
| H  | 6.228980000  | -0.281281000 | -5.278062000 |
| O  | 3.199662000  | 0.184541000  | -4.003683000 |
| H  | 0.931204000  | -1.512807000 | -5.786760000 |

Fe-NU-1000-OH (TS2\_4)

Free Energy: -4588.678904

Electronic Energy: -4588.973514

|   |              |              |              |
|---|--------------|--------------|--------------|
| C | 5.726500000  | -2.889200000 | -2.160200000 |
| C | -5.638900000 | -2.885100000 | -2.451400000 |
| C | 4.388900000  | -3.187700000 | -2.460000000 |
| C | -4.293000000 | -3.161900000 | -2.734600000 |
| C | 4.106400000  | -4.252600000 | -3.328500000 |
| C | -3.986000000 | -4.236300000 | -3.582700000 |
| C | 5.138200000  | -5.020700000 | -3.859400000 |
| C | -4.998200000 | -5.035200000 | -4.107600000 |
| C | 6.482800000  | -4.751200000 | -3.537700000 |
| C | -6.351100000 | -4.782200000 | -3.807100000 |
| C | 6.755800000  | -3.657500000 | -2.694900000 |
| C | -6.649700000 | -3.679700000 | -2.983400000 |
| C | 5.673400000  | 2.762000000  | -2.369400000 |
| C | -5.668800000 | 2.628900000  | -2.684600000 |
| C | 4.341400000  | 3.021300000  | -2.724800000 |
| C | -4.324800000 | 2.872000000  | -3.008000000 |
| C | 4.069900000  | 4.017800000  | -3.673300000 |
| C | -4.019400000 | 3.907100000  | -3.904900000 |
| C | 5.105900000  | 4.760700000  | -4.231200000 |
| C | -5.033000000 | 4.692700000  | -4.448900000 |
| C | 6.444700000  | 4.526400000  | -3.861700000 |
| C | -6.384200000 | 4.462600000  | -4.123400000 |
| C | 6.708200000  | 3.500400000  | -2.934600000 |
| C | -6.680500000 | 3.408600000  | -3.237600000 |
| C | -3.223400000 | -2.332300000 | -2.105800000 |
| C | -3.315200000 | -2.089500000 | 2.441200000  |
| C | -3.322900000 | 2.330100000  | 2.211500000  |
| C | 3.188500000  | 2.437000000  | 2.193700000  |
| C | 3.242000000  | 2.242000000  | -2.086000000 |
| C | 3.280300000  | -2.402400000 | -1.851700000 |
| C | -3.245500000 | 2.084800000  | -2.346700000 |
| C | 3.174600000  | -2.211100000 | 2.426600000  |
| H | 5.937000000  | -2.056700000 | -1.495800000 |
| H | -5.871700000 | -2.048200000 | -1.800500000 |

|   |              |              |              |
|---|--------------|--------------|--------------|
| H | 4.900900000  | -5.847200000 | -4.524400000 |
| H | -4.737200000 | -5.873100000 | -4.749000000 |
| H | 7.786000000  | -3.416500000 | -2.445100000 |
| H | -7.686200000 | -3.452500000 | -2.747200000 |
| H | 5.874800000  | 1.981600000  | -1.642500000 |
| H | -5.899000000 | 1.830200000  | -1.986300000 |
| H | 4.876900000  | 5.534100000  | -4.959800000 |
| H | -4.774300000 | 5.498300000  | -5.131200000 |
| H | 7.734600000  | 3.290500000  | -2.644500000 |
| H | -7.714900000 | 3.205600000  | -2.972200000 |
| H | -7.139900000 | -5.409200000 | -4.210200000 |
| H | 7.286100000  | -5.356800000 | -3.944800000 |
| H | -7.172900000 | 5.077500000  | -4.544800000 |
| H | 7.252000000  | 5.109100000  | -4.293600000 |
| H | -4.101094000 | -2.666618000 | 2.881887000  |
| H | 3.964843000  | 3.004750000  | 2.662583000  |
| H | -4.111859000 | 2.914440000  | 2.636930000  |
| H | 3.948377000  | -2.768397000 | 2.911976000  |
| O | -3.663700000 | 1.472100000  | 1.337400000  |
| O | -3.610000000 | 1.255400000  | -1.456700000 |
| O | -3.654000000 | -1.258600000 | 1.542900000  |
| O | -2.127300000 | -2.310200000 | 2.835700000  |
| O | 1.970300000  | -2.521800000 | 2.683600000  |
| O | 2.090000000  | -2.742700000 | -2.140600000 |
| O | 3.548200000  | -1.286100000 | 1.640800000  |
| O | 3.614200000  | -1.448400000 | -1.083700000 |
| O | 3.557200000  | 1.485700000  | 1.438500000  |
| O | 3.591800000  | 1.320300000  | -1.285300000 |
| O | 2.046400000  | 2.547800000  | -2.386400000 |
| O | 1.986500000  | 2.771300000  | 2.435700000  |
| O | -2.020200000 | -2.554500000 | -2.444700000 |
| O | -3.604000000 | -1.474700000 | -1.248400000 |
| O | -2.134300000 | 2.562400000  | 2.592300000  |
| O | -2.045100000 | 2.316700000  | -2.694300000 |
| H | -1.962596000 | -2.854136000 | 0.231878000  |
| H | -1.023967000 | 1.830646000  | 4.316022000  |
| H | -0.136948000 | 0.520362000  | 4.153879000  |
| H | -0.603345000 | 1.226315000  | -4.476174000 |
| H | -0.040594000 | 4.058925000  | -0.403768000 |
| H | 0.636517000  | 4.485253000  | 1.601101000  |
| H | 0.835684000  | 4.283059000  | -1.699518000 |
| H | 1.868158000  | 0.172950000  | 2.992017000  |
| H | -1.962804000 | 2.878353000  | -0.098812000 |
| H | -0.810558000 | -1.486532000 | 4.569380000  |
| H | -0.716766000 | -1.677343000 | -4.118912000 |
| H | 0.842068000  | -4.193599000 | 1.944611000  |
| H | 0.600089000  | -4.561519000 | -1.370497000 |
| H | -0.022139000 | -4.032639000 | 0.621346000  |
| O | -1.115914000 | 0.120859000  | 1.538673000  |
| O | -0.017540000 | -3.889200000 | 1.626335000  |
| O | 1.038173000  | 1.508116000  | 0.021274000  |
| O | 1.314380000  | 0.160029000  | 2.203945000  |
| O | -0.079924000 | -1.083131000 | 4.088898000  |
| O | -0.156512000 | 1.528752000  | 4.017954000  |
| O | 0.148957000  | -1.768796000 | -3.706997000 |
| O | 1.049946000  | -1.466262000 | 0.231610000  |

|    |              |              |              |
|----|--------------|--------------|--------------|
| O  | -1.423367000 | -2.055684000 | 0.228585000  |
| O  | -0.066896000 | -3.980349000 | -0.994605000 |
| O  | -0.090973000 | 3.990336000  | 1.209220000  |
| O  | -0.009352000 | 3.917489000  | -1.410000000 |
| O  | -1.424892000 | 2.079970000  | -0.057097000 |
| O  | 0.205231000  | 1.248175000  | -3.954458000 |
| O  | 1.389946000  | -0.120849000 | -1.997764000 |
| O  | -1.103527000 | -0.091577000 | -1.427633000 |
| Zr | 2.479242000  | 0.010103000  | 0.127355000  |
| Zr | -0.083958000 | -1.615948000 | 2.050919000  |
| Zr | -0.044402000 | 1.958114000  | 1.756823000  |
| Zr | -0.011016000 | 1.615402000  | -1.781491000 |
| Zr | -2.561045000 | 0.000437000  | 0.054982000  |
| Zr | 0.013266000  | -1.929664000 | -1.524959000 |
| O  | 2.856903000  | -4.577726000 | -3.732062000 |
| H  | 2.249998000  | -3.981084000 | -3.242225000 |
| O  | -2.725826000 | -4.580737000 | -3.917048000 |
| H  | -2.127169000 | -3.972884000 | -3.437923000 |
| O  | 2.829441000  | 4.294447000  | -4.127170000 |
| H  | 2.232863000  | 3.628496000  | -3.731059000 |
| O  | -2.764812000 | 4.231142000  | -4.275898000 |
| H  | -2.162546000 | 3.644538000  | -3.776885000 |
| Fe | 1.522913000  | -0.263124000 | -3.884123000 |
| O  | 2.379477000  | -1.491433000 | -5.106330000 |
| C  | 4.125440000  | 0.223377000  | -5.031835000 |
| C  | 5.398084000  | -0.027160000 | -4.266499000 |
| H  | 3.612230000  | -0.882730000 | -5.311855000 |
| H  | 4.244219000  | 0.661124000  | -6.038632000 |
| H  | 5.987133000  | 0.895686000  | -4.201615000 |
| H  | 5.165348000  | -0.347442000 | -3.246466000 |
| H  | 6.014767000  | -0.790874000 | -4.749495000 |
| O  | 3.108631000  | 0.747524000  | -4.348684000 |
| H  | 2.215142000  | -2.445844000 | -5.084205000 |

Fe-NU-1000-OH (Prod\_4)

Free Energy: -4588.727259

Electronic Energy: -4589.0216379

|   |              |              |              |
|---|--------------|--------------|--------------|
| C | 5.726500000  | -2.889200000 | -2.160200000 |
| C | -5.638900000 | -2.885100000 | -2.451400000 |
| C | 4.388900000  | -3.187700000 | -2.460000000 |
| C | -4.293000000 | -3.161900000 | -2.734600000 |
| C | 4.106400000  | -4.252600000 | -3.328500000 |
| C | -3.986000000 | -4.236300000 | -3.582700000 |
| C | 5.138200000  | -5.020700000 | -3.859400000 |
| C | -4.998200000 | -5.035200000 | -4.107600000 |
| C | 6.482800000  | -4.751200000 | -3.537700000 |
| C | -6.351100000 | -4.782200000 | -3.807100000 |
| C | 6.755800000  | -3.657500000 | -2.694900000 |
| C | -6.649700000 | -3.679700000 | -2.983400000 |
| C | 5.673400000  | 2.762000000  | -2.369400000 |
| C | -5.668800000 | 2.628900000  | -2.684600000 |
| C | 4.341400000  | 3.021300000  | -2.724800000 |
| C | -4.324800000 | 2.872000000  | -3.008000000 |
| C | 4.069900000  | 4.017800000  | -3.673300000 |
| C | -4.019400000 | 3.907100000  | -3.904900000 |
| C | 5.105900000  | 4.760700000  | -4.231200000 |

|   |              |              |              |
|---|--------------|--------------|--------------|
| C | -5.033000000 | 4.692700000  | -4.448900000 |
| C | 6.444700000  | 4.526400000  | -3.861700000 |
| C | -6.384200000 | 4.462600000  | -4.123400000 |
| C | 6.708200000  | 3.500400000  | -2.934600000 |
| C | -6.680500000 | 3.408600000  | -3.237600000 |
| C | -3.223400000 | -2.332300000 | -2.105800000 |
| C | -3.315200000 | -2.089500000 | 2.441200000  |
| C | -3.322900000 | 2.330100000  | 2.211500000  |
| C | 3.188500000  | 2.437000000  | 2.193700000  |
| C | 3.242000000  | 2.242000000  | -2.086000000 |
| C | 3.280300000  | -2.402400000 | -1.851700000 |
| C | -3.245500000 | 2.084800000  | -2.346700000 |
| C | 3.174600000  | -2.211100000 | 2.426600000  |
| H | 5.937000000  | -2.056700000 | -1.495800000 |
| H | -5.871700000 | -2.048200000 | -1.800500000 |
| H | 4.900900000  | -5.847200000 | -4.524400000 |
| H | -4.737200000 | -5.873100000 | -4.749000000 |
| H | 7.786000000  | -3.416500000 | -2.445100000 |
| H | -7.686200000 | -3.452500000 | -2.747200000 |
| H | 5.874800000  | 1.981600000  | -1.642500000 |
| H | -5.899000000 | 1.830200000  | -1.986300000 |
| H | 4.876900000  | 5.534100000  | -4.959800000 |
| H | -4.774300000 | 5.498300000  | -5.131200000 |
| H | 7.734600000  | 3.290500000  | -2.644500000 |
| H | -7.714900000 | 3.205600000  | -2.972200000 |
| H | -7.139900000 | -5.409200000 | -4.210200000 |
| H | 7.286100000  | -5.356800000 | -3.944800000 |
| H | -7.172900000 | 5.077500000  | -4.544800000 |
| H | 7.252000000  | 5.109100000  | -4.293600000 |
| H | -4.101094000 | -2.666618000 | 2.881887000  |
| H | 3.964843000  | 3.004750000  | 2.662583000  |
| H | -4.111859000 | 2.914440000  | 2.636930000  |
| H | 3.948377000  | -2.768397000 | 2.911976000  |
| O | -3.663700000 | 1.472100000  | 1.337400000  |
| O | -3.610000000 | 1.255400000  | -1.456700000 |
| O | -3.654000000 | -1.258600000 | 1.542900000  |
| O | -2.127300000 | -2.310200000 | 2.835700000  |
| O | 1.970300000  | -2.521800000 | 2.683600000  |
| O | 2.090000000  | -2.742700000 | -2.140600000 |
| O | 3.548200000  | -1.286100000 | 1.640800000  |
| O | 3.614200000  | -1.448400000 | -1.083700000 |
| O | 3.557200000  | 1.485700000  | 1.438500000  |
| O | 3.591800000  | 1.320300000  | -1.285300000 |
| O | 2.046400000  | 2.547800000  | -2.386400000 |
| O | 1.986500000  | 2.771300000  | 2.435700000  |
| O | -2.020200000 | -2.554500000 | -2.444700000 |
| O | -3.604000000 | -1.474700000 | -1.248400000 |
| O | -2.134300000 | 2.562400000  | 2.592300000  |
| O | -2.045100000 | 2.316700000  | -2.694300000 |
| H | -1.954671000 | -2.861143000 | 0.229412000  |
| H | -1.035850000 | 1.819805000  | 4.310103000  |
| H | -0.136856000 | 0.518228000  | 4.155814000  |
| H | -0.518981000 | 1.398146000  | -4.527994000 |
| H | -0.041982000 | 4.045871000  | -0.398116000 |
| H | 0.633565000  | 4.482302000  | 1.602461000  |
| H | 0.828607000  | 4.288150000  | -1.688831000 |

|    |              |              |              |
|----|--------------|--------------|--------------|
| H  | 1.878734000  | 0.168654000  | 2.987340000  |
| H  | -1.965167000 | 2.871291000  | -0.104057000 |
| H  | -0.822793000 | -1.486765000 | 4.568837000  |
| H  | -0.775140000 | -1.959567000 | -4.068536000 |
| H  | 0.843288000  | -4.194343000 | 1.940345000  |
| H  | 0.603159000  | -4.547995000 | -1.375659000 |
| H  | -0.017169000 | -4.025315000 | 0.614218000  |
| O  | -1.114580000 | 0.118222000  | 1.539349000  |
| O  | -0.017414000 | -3.891992000 | 1.623703000  |
| O  | 1.039227000  | 1.522134000  | 0.032936000  |
| O  | 1.310596000  | 0.157862000  | 2.209982000  |
| O  | -0.084535000 | -1.088698000 | 4.095638000  |
| O  | -0.161895000 | 1.526493000  | 4.022565000  |
| O  | 0.136939000  | -1.984613000 | -3.755882000 |
| O  | 1.050219000  | -1.482758000 | 0.244315000  |
| O  | -1.423579000 | -2.057580000 | 0.230718000  |
| O  | -0.062096000 | -3.970350000 | -0.991580000 |
| O  | -0.101074000 | 3.993475000  | 1.216394000  |
| O  | -0.010612000 | 3.908914000  | -1.403571000 |
| O  | -1.426216000 | 2.074347000  | -0.056193000 |
| O  | 0.254796000  | 1.396123000  | -3.955005000 |
| O  | 1.343422000  | -0.117515000 | -1.988272000 |
| O  | -1.133898000 | -0.105626000 | -1.436013000 |
| Zr | 2.447316000  | 0.008078000  | 0.121617000  |
| Zr | -0.087723000 | -1.620752000 | 2.055256000  |
| Zr | -0.047504000 | 1.958472000  | 1.757101000  |
| Zr | -0.011363000 | 1.590130000  | -1.786398000 |
| Zr | -2.561687000 | -0.001617000 | 0.052526000  |
| Zr | 0.022758000  | -1.911342000 | -1.529978000 |
| O  | 2.866038000  | -4.581592000 | -3.732895000 |
| H  | 2.248676000  | -3.951589000 | -3.300041000 |
| O  | -2.724067000 | -4.580311000 | -3.916181000 |
| H  | -2.125951000 | -3.986453000 | -3.417360000 |
| O  | 2.828383000  | 4.300755000  | -4.118877000 |
| H  | 2.221832000  | 3.663484000  | -3.687687000 |
| O  | -2.763450000 | 4.228542000  | -4.274614000 |
| H  | -2.163750000 | 3.639518000  | -3.773093000 |
| Fe | 1.300891000  | -0.337495000 | -3.986256000 |
| O  | 0.670960000  | -0.680820000 | -6.197595000 |
| C  | 4.258845000  | -1.189899000 | -4.656972000 |
| C  | 5.009241000  | -0.142274000 | -3.937901000 |
| H  | 4.806647000  | -2.024719000 | -5.126509000 |
| H  | 1.416451000  | -0.671793000 | -6.809160000 |
| H  | 4.814955000  | 0.835765000  | -4.395402000 |
| H  | 4.632210000  | -0.073431000 | -2.906722000 |
| H  | 6.083563000  | -0.328404000 | -3.924622000 |
| O  | 3.026325000  | -1.177182000 | -4.777740000 |
| H  | 0.488470000  | -1.620764000 | -6.053207000 |
